# Supplementary material
Source: PubMed Central journal article supplement (PMC4784868)
Supplement: baol025359.ww1_default.pdf [file baol025359.ww1_default.pdf]

**Web appendix 1: Included study selection and characteristics**

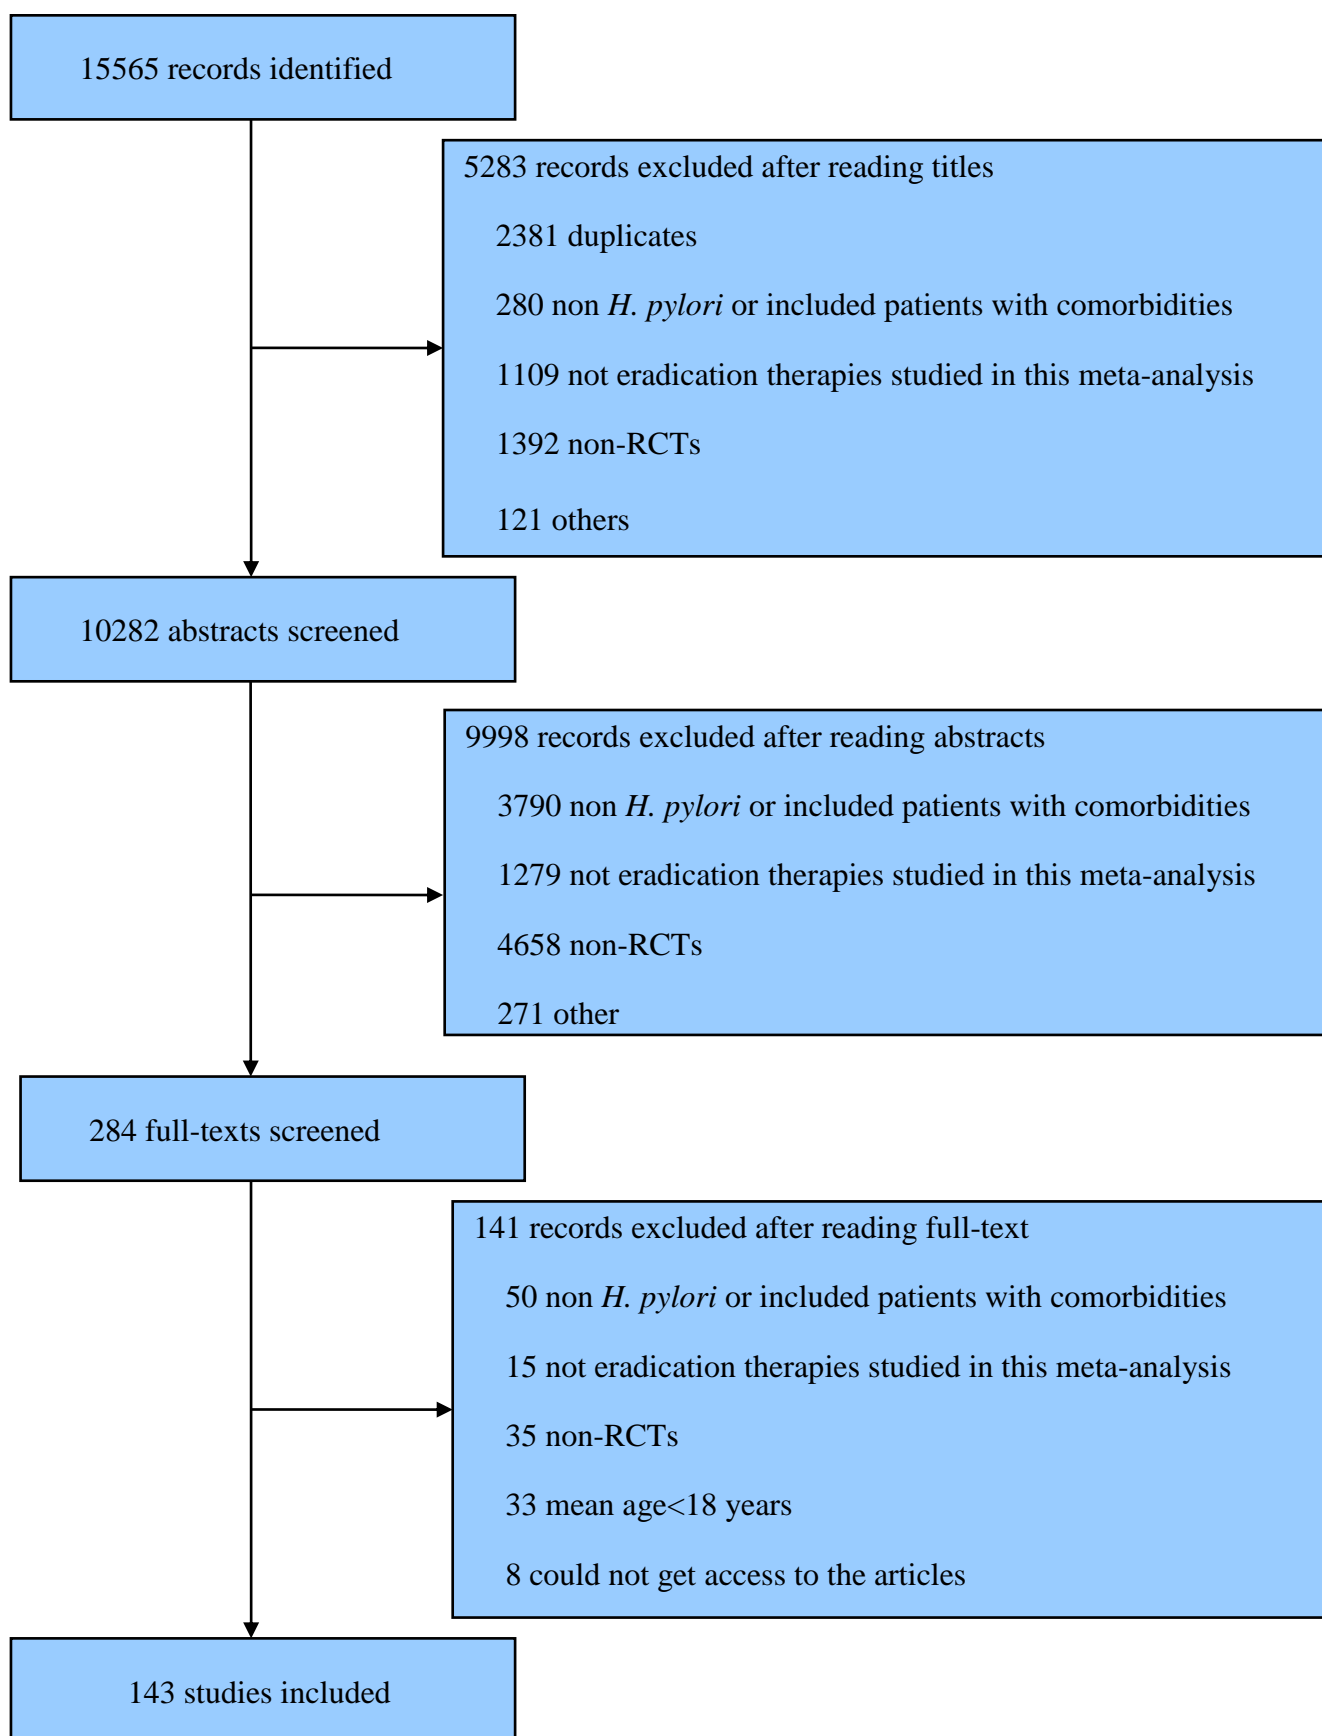

**Fig S1.1 Flow diagram of study selection**

**Table S1.1 Characteristics of studies included in systematic review and meta-analysis**

| Authors               | Country | Jadad score     | Study design          | Patients' characteristic |                   |                               |                   |             |                                                   |                             | Treatment      |             |          |
|-----------------------|---------|-----------------|-----------------------|--------------------------|-------------------|-------------------------------|-------------------|-------------|---------------------------------------------------|-----------------------------|----------------|-------------|----------|
|                       |         |                 |                       | Treatment                | No. of patients   | Age(range) or $\pm$ (SD) year | Man/Women (n1/n2) | Follow-up   | Confirmation of <i>H. pylori</i> infection        | Confirmation of Eradication | Intervention   | Dosage      | Duration |
| Alkim H<br>2011 (1)   | Turkey  | 3               | RCT,<br>single-center | 14d                      | 63                | 36.2 $\pm$ 10.4               | 37/26             | 6-8 weeks   | histological<br>examination, rapid<br>urease test | <sup>13</sup> C-UBT         | ranitidine     | 400 mg bid  | 14d      |
|                       |         |                 |                       | 14d triple               | 64                | 39.6 $\pm$ 12.6               | 35/29             | 6-8 weeks   |                                                   |                             | omeprazole     | 20 mg bid   | 14d      |
|                       |         |                 |                       | 14d triple               | 61                | 38.9 $\pm$ 11.6               | 35/26             | 6-8 weeks   | histological<br>examination, rapid<br>urease test | <sup>13</sup> C-UBT         | amoxicillin    | 1000 mg bid | 14d      |
|                       |         |                 |                       | 14d triple               | 64                | 35.3 $\pm$ 7.7                | 37/27             | 6-8 weeks   | clarithromycin                                    |                             | 500 mg bid     | 14d         |          |
|                       |         |                 |                       | 14d triple               | 64                | 37.6 $\pm$ 10.2               | 33/31             | 6-8 weeks   | histological<br>examination, rapid<br>urease test | <sup>13</sup> C-UBT         | esomeprazole   | 40 mg bid   | 14d      |
|                       |         |                 |                       | 14d triple               | 63                | 36.4 $\pm$ 8.4                | 37/26             | 6-8 weeks   | amoxicillin                                       |                             | 1000 mg bid    | 14d         |          |
|                       |         |                 |                       | 14d triple               | 64                | 37.6 $\pm$ 10.2               | 33/31             | 6-8 weeks   | histological<br>examination, rapid<br>urease test | <sup>13</sup> C-UBT         | clarithromycin | 500 mg bid  | 14d      |
|                       |         |                 |                       | 14d triple               | 63                | 36.4 $\pm$ 8.4                | 37/26             | 6-8 weeks   | esomeprazole                                      |                             | 40 mg bid      | 14d         |          |
| Aminian K<br>2010 (2) | Iran    | 3               | RCT                   | 10d triple               | 107               | 45.3 $\pm$ 13.1               | 42/65             | 8 weeks     | rapid urease test                                 | stool antigen<br>test       | omeprazole     | 20 mg bid   | 10d      |
|                       |         |                 |                       | 10d triple               | 107               | 45.3 $\pm$ 13.1               | 42/65             | 8 weeks     | rapid urease test                                 | stool antigen<br>test       | amoxicillin    | 1000 mg bid | 10d      |
|                       |         |                 |                       | 10d triple               | 107               | 45.3 $\pm$ 13.1               | 42/65             | 8 weeks     | rapid urease test                                 | stool antigen<br>test       | clarithromycin | 500 mg bid  | 10d      |
|                       |         |                 |                       | 10d sequential           | 107               | 43.7 $\pm$ 11.9               | 45/62             | 8 weeks     | rapid urease test                                 | stool antigen<br>test       | omeprazole     | 20 mg bid   | 1-5d     |
| 10d sequential        | 107     | 43.7 $\pm$ 11.9 | 45/62                 | 8 weeks                  | rapid urease test | stool antigen<br>test         | amoxicillin       | 1000 mg bid | 1-5d                                              |                             |                |             |          |

| Authors             | Country                   | Jadad score    | Study design         | Patients' characteristic     |                    |                               |                   |           |                                                        | Treatment                                              |                     |                 |             |     |
|---------------------|---------------------------|----------------|----------------------|------------------------------|--------------------|-------------------------------|-------------------|-----------|--------------------------------------------------------|--------------------------------------------------------|---------------------|-----------------|-------------|-----|
|                     |                           |                |                      | Treatment                    | No. of patients    | Age(range) or $\pm$ (SD) year | Man/Women (n1/n2) | Follow-up | Confirmation of <i>H. pylori</i> infection             | Confirmation of Eradication                            | Intervention        | Dosage          | Duration    |     |
| Assem M<br>2010 (3) | Egypt and<br>Saudi Arabia | 3              | RCT,<br>multi-center | 14d bismuth                  | 107                | 46.7 $\pm$ 14.2               | 51/56             | 8 weeks   | rapid urease test                                      | stool antigen<br>test                                  | omeprazole          | 20 mg bid       | 6-10d       |     |
|                     |                           |                |                      |                              |                    |                               |                   |           |                                                        |                                                        | metronidazole       | 500 mg bid      | 6-10d       |     |
|                     |                           |                |                      |                              |                    |                               |                   |           |                                                        |                                                        | clarithromycin      | 500 mg bid      | 6-10d       |     |
|                     |                           |                |                      |                              | 7d triple          | 150                           | 33.3 (20-75)      | 89/61     | 6 weeks                                                | <sup>13</sup> C-UBT                                    | <sup>13</sup> C-UBT | omeprazole      | 20 mg bid   | 14d |
|                     |                           |                |                      |                              |                    |                               |                   |           |                                                        |                                                        |                     | amoxicillin     | 1000 mg bid | 14d |
|                     |                           |                |                      |                              |                    |                               |                   |           |                                                        |                                                        |                     | metronidazole   | 500 mg bid  | 14d |
|                     |                           |                |                      |                              | 7d<br>levofloxacin | 150                           | 32.3 (20-64)      | 96/54     | 6 weeks                                                | <sup>13</sup> C-UBT                                    | <sup>13</sup> C-UBT | bismuth         | 240 mg bid  | 14d |
|                     |                           |                |                      |                              |                    |                               |                   |           |                                                        |                                                        |                     | clarithromycin  | 500 mg bid  | 7d  |
|                     |                           |                |                      |                              |                    |                               |                   |           |                                                        |                                                        |                     | esomeprazole    | 20 mg bid   | 7d  |
|                     |                           |                |                      |                              | 7d<br>levofloxacin | 150                           | 33.6 (20-60)      | 102/48    | 6 weeks                                                | <sup>13</sup> C-UBT                                    | <sup>13</sup> C-UBT | levofloxacin    | 500 mg qd   | 7d  |
|                     |                           | clarithromycin | 500 mg bid           | 7d                           |                    |                               |                   |           |                                                        |                                                        |                     |                 |             |     |
|                     |                           | esomeprazole   | 20 mg bid            | 7d                           |                    |                               |                   |           |                                                        |                                                        |                     |                 |             |     |
| Avşar E<br>2013 (4) | Turkey                    | 3              | RCT,<br>multi-center | 14d<br>ranitidine<br>bismuth | 149                | 40.9 (18-62)                  | 68/81             | 6 weeks   | histopathological<br>examination, rapid<br>urease test | <sup>13</sup> C-UBT                                    | ranitidine          | 400 mg bid      | 14d         |     |
|                     |                           |                |                      |                              |                    |                               |                   |           |                                                        |                                                        |                     | bismuth citrate |             |     |
|                     |                           |                |                      |                              | 14d triple         | 130                           | 42.6 (19-64)      | 55/75     | 6 weeks                                                | histopathological<br>examination, rapid<br>urease test | <sup>13</sup> C-UBT | amoxicillin     | 1000 mg bid | 14d |
|                     |                           |                |                      |                              |                    |                               |                   |           |                                                        |                                                        |                     | clarithromycin  | 500 mg bid  | 14d |
|                     |                           |                |                      |                              |                    |                               |                   |           |                                                        |                                                        |                     | lansoprazole    | 30 mg bid   | 14d |
| Aydin A<br>2007 (5) | Turkey                    | 2              | RCT                  | 7d triple                    | 36                 | 43.8 $\pm$ 14.2               | 15/19             | 1 month   | rapid urease test,<br>histopathologic                  | rapid urease<br>test,                                  | pantoprazole        | 40 mg bid       | 7d          |     |
|                     |                           |                |                      |                              |                    |                               |                   |           |                                                        |                                                        |                     | amoxicillin     | 1000 mg bid | 7d  |

| Authors          | Country | Jadad score | Study design                     | Patients' characteristic |                 |                           |                   |              |                                             |                             | Treatment      |             |          |                                                |                                                |                |             |     |
|------------------|---------|-------------|----------------------------------|--------------------------|-----------------|---------------------------|-------------------|--------------|---------------------------------------------|-----------------------------|----------------|-------------|----------|------------------------------------------------|------------------------------------------------|----------------|-------------|-----|
|                  |         |             |                                  | Treatment                | No. of patients | Age(range) or ± (SD) year | Man/Women (n1/n2) | Follow-up    | Confirmation of <i>H. pylori</i> infection  | Confirmation of Eradication | Intervention   | Dosage      | Duration |                                                |                                                |                |             |     |
|                  |         |             |                                  |                          |                 |                           |                   |              | examination                                 | histopathologic examination | clarithromycin | 500 mg bid  | 7d       |                                                |                                                |                |             |     |
|                  |         |             |                                  |                          |                 |                           |                   |              | 14d triple                                  | 37                          | 44.7±6.4       | 16/18       | 1 month  | rapid urease test, histopathologic examination | rapid urease test, histopathologic examination | pantoprazole   | 40 mg bid   | 14d |
|                  |         |             |                                  |                          |                 |                           |                   |              |                                             |                             |                |             |          |                                                |                                                | amoxicillin    | 1000 mg bid | 14d |
|                  |         |             |                                  |                          |                 |                           |                   |              |                                             |                             |                |             |          |                                                |                                                | clarithromycin | 500 mg bid  | 14d |
| Basu PP 2011 (6) | US      | 3           | open-label, RCT                  | 7d concomitant           | 90              | 37 (26-58)                | 52/38             | 4 weeks      | endoscopy, monoclonal stool antigen testing | stool antigen testing       | levofloxacin   | 250 mg qd   | 7d       |                                                |                                                |                |             |     |
|                  |         |             |                                  |                          |                 |                           |                   |              |                                             |                             | omeprazole     | 40 mg qd    | 7d       |                                                |                                                |                |             |     |
|                  |         |             |                                  |                          |                 |                           |                   |              |                                             |                             | nitazoxanide   | 500 mg bid  | 7d       |                                                |                                                |                |             |     |
|                  |         |             |                                  |                          |                 |                           |                   |              |                                             |                             | doxycycline    | 100 mg qd   | 7d       |                                                |                                                |                |             |     |
|                  |         |             |                                  |                          |                 |                           |                   |              | 10d concomitant                             | 90                          | 36 (22-48)     | 51/39       | 4 weeks  | endoscopy, monoclonal stool antigen testing    | stool antigen testing                          | levofloxacin   | 250 mg qd   | 10d |
|                  |         |             |                                  |                          |                 |                           |                   |              |                                             |                             |                |             |          |                                                |                                                | omeprazole     | 40 mg qd    | 10d |
|                  |         |             |                                  |                          |                 |                           |                   | nitazoxanide | 500 mg bid                                  | 10d                         |                |             |          |                                                |                                                |                |             |     |
|                  |         |             |                                  |                          |                 |                           |                   |              | doxycycline                                 | 100 mg qd                   | 10d            |             |          |                                                |                                                |                |             |     |
|                  |         |             |                                  | 10d triple               | 90              | 37 (28-52)                | 53/37             | 4 weeks      | endoscopy, monoclonal stool antigen testing | stool antigen testing       | lansoprazole   | 30 mg bid   | 10d      |                                                |                                                |                |             |     |
|                  |         |             |                                  |                          |                 |                           |                   |              |                                             |                             | clarithromycin | 500 mg bid  | 10d      |                                                |                                                |                |             |     |
|                  |         |             |                                  |                          |                 |                           |                   |              |                                             |                             | amoxicillin    | 1000 mg bid | 10d      |                                                |                                                |                |             |     |
| Bekar O 2010 (7) | Turkey  | 3           | RCT, double-blind, single-center | 14d probiotic            | 46              | 46±12                     | 26/20             | 31 days      | <sup>14</sup> C-UBT                         | <sup>14</sup> C-UBT         | lansoprazole   | 30 mg bid   | 14d      |                                                |                                                |                |             |     |
|                  |         |             |                                  |                          |                 |                           |                   |              |                                             |                             | amoxicillin    | 1000 mg bid | 14d      |                                                |                                                |                |             |     |
|                  |         |             |                                  |                          |                 |                           |                   |              |                                             |                             | clarithromycin | 500 mg bid  | 14d      |                                                |                                                |                |             |     |
|                  |         |             |                                  |                          |                 |                           |                   |              |                                             |                             | kefir          | 250 ml bid  | 14d      |                                                |                                                |                |             |     |
|                  |         |             |                                  | 14d triple               | 36              | 43±12                     | 20/16             | 31 days      | <sup>14</sup> C-UBT                         | <sup>14</sup> C-UBT         | lansoprazole   | 30 mg bid   | 14d      |                                                |                                                |                |             |     |
|                  |         |             |                                  |                          |                 |                           |                   |              |                                             |                             | amoxicillin    | 1000 mg bid | 14d      |                                                |                                                |                |             |     |
|                  |         |             |                                  |                          |                 |                           |                   |              |                                             |                             | clarithromycin | 500 mg bid  | 14d      |                                                |                                                |                |             |     |
| Bhasin DK        | India   | 2           | RCT                              | 7d triple                | 22              | 45±15                     | 12/10             | 1 month      | rapid urease test,                          | rapid urease                | lansoprazole   | 30 mg qd    | 7d       |                                                |                                                |                |             |     |

| Authors             | Country            | Jadad score | Study design                    | Patients' characteristic |                 |                               |                   |           |                                                                                       | Treatment                                |                               |            |                 |            |         |                                                                                       |                                                  |                |             |             |     |  |  |  |
|---------------------|--------------------|-------------|---------------------------------|--------------------------|-----------------|-------------------------------|-------------------|-----------|---------------------------------------------------------------------------------------|------------------------------------------|-------------------------------|------------|-----------------|------------|---------|---------------------------------------------------------------------------------------|--------------------------------------------------|----------------|-------------|-------------|-----|--|--|--|
|                     |                    |             |                                 | Treatment                | No. of patients | Age(range) or $\pm$ (SD) year | Man/Women (n1/n2) | Follow-up | Confirmation of <i>H. pylori</i> infection                                            | Confirmation of Eradication              | Intervention                  | Dosage     | Duration        |            |         |                                                                                       |                                                  |                |             |             |     |  |  |  |
| 2000 (8)            |                    |             |                                 |                          |                 |                               |                   |           |                                                                                       |                                          | histopathological examination | test,      | clarithromycin  | 250 mg bid | 7d      |                                                                                       |                                                  |                |             |             |     |  |  |  |
|                     |                    |             |                                 |                          |                 |                               |                   |           |                                                                                       |                                          |                               |            |                 |            |         |                                                                                       |                                                  |                |             |             |     |  |  |  |
|                     |                    |             |                                 |                          |                 |                               |                   |           |                                                                                       |                                          | 14d triple                    | 24         | 36 $\pm$ 12     | 18/6       | 1 month | rapid urease test, histopathological examination                                      | rapid urease test, histopathological examination | lansoprazole   | 30 mg qd    | 14d         |     |  |  |  |
|                     |                    |             |                                 |                          |                 |                               |                   |           |                                                                                       |                                          |                               |            |                 |            |         |                                                                                       |                                                  |                | amoxicillin | 500 mg tid  | 14d |  |  |  |
| Bujanda L 2001 (9)  | Spain and Portugal | 4           | multi-center, double-blind, RCT | 7d triple                | 49              | 43.1 $\pm$ 13.6               | 28/21             | 4 weeks   | rapid urease test, <sup>13</sup> C-UBT                                                | <sup>13</sup> C-UBT                      | omeprazole                    | 20 mg bid  | 7d              |            |         |                                                                                       |                                                  |                |             |             |     |  |  |  |
|                     |                    |             |                                 |                          |                 |                               |                   |           |                                                                                       |                                          |                               |            |                 |            |         |                                                                                       |                                                  |                |             |             |     |  |  |  |
|                     |                    |             |                                 |                          |                 |                               |                   |           |                                                                                       |                                          | 7d ranitidine bismuth         | 53         | 42.5 $\pm$ 13.2 | 21/32      | 4 weeks | rapid urease test, <sup>13</sup> C-UBT                                                | <sup>13</sup> C-UBT                              | clarithromycin | 500 mg bid  | 7d          |     |  |  |  |
|                     |                    |             |                                 |                          |                 |                               |                   |           |                                                                                       |                                          |                               |            |                 |            |         |                                                                                       |                                                  |                | amoxicillin | 1000 mg bid | 7d  |  |  |  |
| Bujanda L 2001 (10) | Spain              | 2           | RCT                             | 7d triple                | 100             | 50                            | 45/55             | 1 month   | histological examination, rapid urease test, <sup>13</sup> C-UBT, <sup>14</sup> C-UBT | <sup>13</sup> C-UBT, <sup>14</sup> C-UBT | omeprazole                    | 20 mg bid  | 7d              |            |         |                                                                                       |                                                  |                |             |             |     |  |  |  |
|                     |                    |             |                                 |                          |                 |                               |                   |           |                                                                                       |                                          |                               |            |                 |            |         |                                                                                       |                                                  |                |             |             |     |  |  |  |
|                     |                    |             |                                 |                          |                 |                               |                   |           |                                                                                       |                                          | 7d ranitidine bismuth         | 100        | 46              | 43/57      | 1 month | histological examination, rapid urease test, <sup>13</sup> C-UBT, <sup>14</sup> C-UBT | <sup>13</sup> C-UBT, <sup>14</sup> C-UBT         | clarithromycin | 500 mg bid  | 7d          |     |  |  |  |
|                     |                    |             |                                 |                          |                 |                               |                   |           |                                                                                       |                                          |                               |            |                 |            |         |                                                                                       |                                                  |                | amoxicillin | 1000 mg bid | 7d  |  |  |  |
| Calvet X 2005 (11)  | Spain              | 3           | RCT, multi-center               | 7d triple                | 237             | 51.3 $\pm$ 15                 | 148/89            | 2 months  | histological examination, rapid                                                       | <sup>13</sup> C-UBT, or histological     | ranitidine                    | 400 mg bid | 7d              |            |         |                                                                                       |                                                  |                |             |             |     |  |  |  |
|                     |                    |             |                                 |                          |                 |                               |                   |           |                                                                                       |                                          |                               |            |                 |            |         |                                                                                       |                                                  |                |             |             |     |  |  |  |
|                     |                    |             |                                 |                          |                 |                               |                   |           |                                                                                       |                                          | clarithromycin                | 500 mg bid | 7d              |            |         |                                                                                       |                                                  |                |             |             |     |  |  |  |

| Authors                 | Country | Jadad score | Study design             | Patients' characteristic |                 |                           |                   |                |                                                                        | Treatment                                                |                |             |          |
|-------------------------|---------|-------------|--------------------------|--------------------------|-----------------|---------------------------|-------------------|----------------|------------------------------------------------------------------------|----------------------------------------------------------|----------------|-------------|----------|
|                         |         |             |                          | Treatment                | No. of patients | Age(range) or ± (SD) year | Man/Women (n1/n2) | Follow-up      | Confirmation of <i>H. pylori</i> infection                             | Confirmation of Eradication                              | Intervention   | Dosage      | Duration |
| Calvet X<br>2002 (12)   | Spain   | 2           | RCT                      | 7d bismuth               | 168             | 52.6±17.4                 | 120/48            | 2 months       | urease test, or<br><sup>13</sup> C-UBT                                 | examination                                              | amoxicillin    | 1000 mg bid | 7d       |
|                         |         |             |                          |                          |                 |                           |                   |                | histological examination, rapid urease test, or<br><sup>13</sup> C-UBT | <sup>13</sup> C-UBT, or histological examination         | rabeprazole    | 20 mg bid   | 10d      |
|                         |         |             |                          | 10d triple               | 221             | 51.4±16                   | 145/76            | 2 months       | <sup>13</sup> C-UBT, gastric histological examination, or urease test  | <sup>13</sup> C-UBT, biopsy of the antrum                | clarithromycin | 500 mg bid  | 10d      |
|                         |         |             |                          |                          |                 |                           |                   |                |                                                                        |                                                          | amoxicillin    | 1000 mg bid | 10d      |
| Canducci F<br>2000 (13) | Italy   | 2           | RCT, open, single-center | 7d triple                | 60              | 51.5±15.9                 | 117/54            | 2 months       | <sup>13</sup> C-UBT, gastric histological examination, or urease test  | <sup>13</sup> C-UBT, biopsy of the antrum                | omeprazole     | 20 mg bid   | 7d       |
|                         |         |             |                          |                          |                 |                           |                   |                |                                                                        |                                                          | clarithromycin | 500 mg bid  | 7d       |
|                         |         |             |                          | 7d probiotic             | 60              | 38±11                     | 64/56             | 6 weeks        | histological examination, <sup>13</sup> C-UBT                          | <sup>13</sup> C-UBT, endoscopy, histological examination | amoxicillin    | 1000 mg bid | 7d       |
|                         |         |             |                          |                          |                 |                           |                   |                |                                                                        |                                                          | rabeprazole    | 20 mg bid   | 7d       |
|                         |         |             |                          |                          |                 |                           | amoxicillin       | 500 mg tds     | 7d                                                                     |                                                          |                |             |          |
|                         |         |             |                          |                          |                 |                           |                   | clarithromycin | 250 mg tds                                                             | 7d                                                       |                |             |          |
|                         |         |             |                          |                          |                 |                           |                   | rabeprazole    | 20 mg bid                                                              | 7d                                                       |                |             |          |
|                         |         |             |                          |                          |                 |                           |                   | amoxicillin    | 500 mg tds                                                             | 7d                                                       |                |             |          |
|                         |         |             |                          |                          |                 |                           |                   | clarithromycin | 250 mg tds                                                             | 7d                                                       |                |             |          |
|                         |         |             |                          |                          |                 |                           |                   | Lactéol Fort   | tds                                                                    | 10d                                                      |                |             |          |

| Authors              | Country | Jadad score | Study design                | Patients' characteristic |                 |                           |                   |                 |                                                                  |                                                      | Treatment      |             |          |
|----------------------|---------|-------------|-----------------------------|--------------------------|-----------------|---------------------------|-------------------|-----------------|------------------------------------------------------------------|------------------------------------------------------|----------------|-------------|----------|
|                      |         |             |                             | Treatment                | No. of patients | Age(range) or ± (SD) year | Man/Women (n1/n2) | Follow-up       | Confirmation of <i>H. pylori</i> infection                       | Confirmation of Eradication                          | Intervention   | Dosage      | Duration |
| Catalano F 2000 (14) | Italy   | 3           | RCT                         | 10d triple               | 55              | 45.14±12.9                | 29/26             | 4 weeks         | rapid urease test, histological examination                      | rapid urease test, histological examination          | omeprazole     | 40 mg om    | 10d      |
|                      |         |             |                             | 10d ranitidine bismuth   | 54              | 43.18±16.20               | 28/26             | 4 weeks         | rapid urease test, histological examination                      | rapid urease test, histological examination          | amoxicillin    | 1000 mg bid | 10d      |
|                      |         |             |                             |                          | clarithromycin  | 500 mg bid                | 10d               | ranitidine      | 400 mg bid                                                       | 10d                                                  |                |             |          |
|                      |         |             |                             |                          |                 |                           |                   | bismuth citrate | amoxicillin                                                      | 1000 mg bid                                          | 10d            |             |          |
| Catalano F 1998 (15) | Italy   | 2           | single-blind, RCT           | 7d triple                | 39              | 51.7±11.9                 | 14/25             | 4 weeks         | culture/ histological examination, rapid urease test             | culture/ histological examination, rapid urease test | omeprazole     | 20 mg bid   | 14d      |
|                      |         |             |                             | 7d ranitidine bismuth    | 42              | 53.7±17                   | 14/28             | 4 weeks         | culture/ histological examination, rapid urease test             | culture/ histological examination, rapid urease test | amoxicillin    | 1000 mg bid | 7d       |
|                      |         |             |                             |                          |                 |                           |                   |                 |                                                                  |                                                      | clarithromycin | 500 mg bid  | 7d       |
|                      |         |             |                             |                          |                 |                           |                   |                 |                                                                  |                                                      | ranitidine     | 400 mg bid  | 14d      |
| Chen LW 2010 (16)    | Taiwan  | 3           | RCT, open-label             | 7d levofloxacin          | 90              | 49.7±15.3                 | 51/38             | 14 weeks        | histological examination, rapid urease test, <sup>14</sup> C-UBT | <sup>14</sup> C-UBT                                  | levofloxacin   | 500 mg qd   | 7d       |
|                      |         |             |                             | 7d triple                | 99              | 49.5±16.1                 | 57/41             | 14 weeks        | histological examination, rapid urease test, <sup>14</sup> C-UBT | <sup>14</sup> C-UBT                                  | esomeprazole   | 40 mg qd    | 7d       |
|                      |         |             |                             |                          |                 |                           |                   |                 |                                                                  |                                                      | amoxicillin    | 1000 mg bid | 7d       |
|                      |         |             |                             |                          |                 |                           |                   |                 |                                                                  |                                                      | clarithromycin | 500 mg bid  | 7d       |
| Cheng H 2010 (17)    | China   | 2           | RCT, parallel, multi-center | 7d levofloxacin          | 150             | 48±13                     | 76/74             | 4 weeks         | <sup>13</sup> C-UBT, or rapid urease test                        | <sup>13</sup> C-UBT                                  | lansoprazole   | 30 mg bid   | 7d       |
|                      |         |             |                             | 7d triple                | 150             | 48±15                     | 71/79             | 4 weeks         | <sup>13</sup> C-UBT, or rapid urease test                        | <sup>13</sup> C-UBT                                  | amoxicillin    | 1000 mg bid | 7d       |
|                      |         |             |                             |                          |                 |                           |                   |                 |                                                                  |                                                      | levofloxacin   | 500 mg qd   | 7d       |
|                      |         |             |                             | 7d triple                | 150             | 48±15                     | 71/79             | 4 weeks         | <sup>13</sup> C-UBT, or rapid urease test                        | <sup>13</sup> C-UBT                                  | lansoprazole   | 30 mg bid   | 7d       |

| Authors               | Country     | Jadad score | Study design | Patients' characteristic |                 |                               |                    |            |                                                                        |                                    | Treatment      |             |          |
|-----------------------|-------------|-------------|--------------|--------------------------|-----------------|-------------------------------|--------------------|------------|------------------------------------------------------------------------|------------------------------------|----------------|-------------|----------|
|                       |             |             |              | Treatment                | No. of patients | Age(range) or $\pm$ (SD) year | Man/Women (n1/n2)  | Follow-up  | Confirmation of <i>H. pylori</i> infection                             | Confirmation of Eradication        | Intervention   | Dosage      | Duration |
| Ching SS<br>2008 (18) | UK          | 3           | RCT          | 7d triple                | 50              | 55.2 $\pm$ 10.9               | 26/24              | 2 months   | urease test, culture, or <sup>13</sup> C-UBT                           | <sup>13</sup> C-UBT                | amoxicillin    | 1000 mg bid | 7d       |
|                       |             |             |              |                          |                 |                               |                    |            |                                                                        |                                    | clarithromycin | 500 mg bid  | 7d       |
|                       |             |             |              | 7d bismuth               | 44              | 53.7 $\pm$ 11.4               | 27/17              | 2 months   | histological examination, urease test, culture, or <sup>13</sup> C-UBT | <sup>13</sup> C-UBT                | lansoprazole   | 30 mg bid   | 7d       |
|                       |             |             |              |                          |                 |                               |                    |            |                                                                        |                                    | metronidazole  | 400 mg tds  | 7d       |
|                       |             |             |              |                          |                 |                               | bismuth subcitrate | 240 mg bid | 7d                                                                     |                                    |                |             |          |
|                       |             |             |              |                          |                 |                               |                    |            |                                                                        | tetracycline chloride              | 500 mg qds     | 7d          |          |
| Choi HS<br>2012 (19)  | South Korea | 2           | RCT          | 7d triple                | 115             |                               | 60/55              | 4 weeks    | UBT, rapid urease test, or histopathological examination               | UBT, histopathological examination | rabeprazole    | 20 mg bid   | 7d       |
|                       |             |             |              |                          |                 |                               |                    |            |                                                                        |                                    | amoxicillin    | 1000 mg bid | 7d       |
|                       |             |             |              | 10d sequential           | 115             | 46.8                          | 59/56              | 4 weeks    | UBT, rapid urease test, or histopathological examination               | UBT, histopathological examination | amoxicillin    | 1000 mg bid | 1-5d     |
|                       |             |             |              |                          |                 |                               |                    |            |                                                                        |                                    | rabeprazole    | 20 mg bid   | 1-5d     |
|                       |             |             |              |                          |                 |                               |                    |            |                                                                        |                                    | rabeprazole    | 20 mg bid   | 6-10d    |
|                       |             |             |              |                          |                 |                               | clarithromycin     | 500 mg bid | 6-10d                                                                  |                                    |                |             |          |
|                       |             |             |              |                          |                 |                               |                    |            |                                                                        | tinidazole                         | 500 mg bid     | 6-10d       |          |
|                       |             |             |              | 10d triple               | 115             |                               | 58/57              | 4 weeks    | UBT, rapid urease test, or histopathological examination               | UBT, histopathological examination | rabeprazole    | 20 mg bid   | 10d      |
|                       |             |             | amoxicillin  |                          |                 |                               |                    |            |                                                                        |                                    | 1000 mg bid    | 10d         |          |
|                       |             |             |              | 14d triple               | 115             |                               | 62/53              | 4 weeks    | UBT, rapid urease test, or histopathological examination               | UBT, histopathological examination | clarithromycin | 500 mg bid  | 10d      |
|                       |             |             |              |                          |                 |                               |                    |            |                                                                        |                                    |                |             |          |



| Authors               | Country     | Jadad score | Study design         | Patients' characteristic |                 |                               |                   |           |                                                      | Treatment                      |                |             |          |
|-----------------------|-------------|-------------|----------------------|--------------------------|-----------------|-------------------------------|-------------------|-----------|------------------------------------------------------|--------------------------------|----------------|-------------|----------|
|                       |             |             |                      | Treatment                | No. of patients | Age(range) or $\pm$ (SD) year | Man/Women (n1/n2) | Follow-up | Confirmation of <i>H. pylori</i> infection           | Confirmation of Eradication    | Intervention   | Dosage      | Duration |
| Choi KH<br>2011 (20)  | South Korea | 4           | double-blind,<br>RCT | 7d triple                | 99              | 55.6 $\pm$ 16.2               | 54/45             | 6 weeks   | test, or<br>histopathological<br>examination         | <sup>13</sup> C-UBT            | amoxicillin    | 1000 mg bid | 14d      |
|                       |             |             |                      |                          |                 |                               |                   |           |                                                      |                                | clarithromycin | 500 mg bid  | 14d      |
|                       |             |             |                      | 7d<br>levofloxacin       | 98              | 55.5 $\pm$ 11.1               | 58/40             | 6 weeks   | rapid urease test,<br>or histological<br>examination | <sup>13</sup> C-UBT            | omeprazole     | 20 mg bid   | 7d       |
|                       |             |             |                      |                          |                 |                               |                   |           |                                                      |                                | amoxicillin    | 1000 mg bid | 7d       |
| Choi WH<br>2008 (21)  | South Korea | 2           | RCT                  | 10d<br>sequential        | 77              | 48.7 $\pm$ 11.1               | 34/43             | 8 weeks   | biopsy                                               | <sup>13</sup> C-UBT,<br>biopsy | omeprazole     | 20 mg bid   | 1-5d     |
|                       |             |             |                      |                          |                 |                               |                   |           |                                                      |                                | amoxicillin    | 1000 mg bid | 1-5d     |
|                       |             |             |                      | 7d triple                | 81              | 50.9 $\pm$ 11.6               | 42/39             | 8 weeks   | biopsy                                               | <sup>13</sup> C-UBT,<br>biopsy | omeprazole     | 20 mg bid   | 7d       |
|                       |             |             |                      |                          |                 |                               |                   |           |                                                      |                                | amoxicillin    | 1000 mg bid | 7d       |
| Chung JW<br>2012 (22) | South Korea | 3           | open-label,<br>RCT   | 10d triple               | 80              | 50.2 $\pm$ 12.1               | 51/29             | 4 weeks   | rapid urease test,<br>giemsa staining,<br>culture    | <sup>13</sup> C-UBT            | lansoprazole   | 30 mg bid   | 10d      |
|                       |             |             |                      |                          |                 |                               |                   |           |                                                      |                                | clarithromycin | 500 mg bid  | 10d      |
|                       |             |             |                      | 10d<br>sequential        | 79              | 49.0 $\pm$ 11.4               | 52/27             | 4 weeks   | rapid urease test,<br>giemsa staining,<br>culture    | <sup>13</sup> C-UBT            | amoxicillin    | 1000 mg bid | 10d      |
|                       |             |             |                      |                          |                 |                               |                   |           |                                                      |                                | lansoprazole   | 30 mg bid   | 1-5d     |
|                       |             |             |                      |                          |                 |                               |                   |           |                                                      |                                | amoxicillin    | 1000 mg bid | 1-5d     |
|                       |             |             |                      |                          |                 |                               |                   |           |                                                      |                                | lansoprazole   | 30 mg bid   | 6-10d    |
|                       |             |             |                      |                          |                 |                               |                   |           |                                                      |                                | metronidazole  | 500 mg bid  | 6-10d    |
|                       |             |             |                      |                          |                 |                               |                   |           |                                                      |                                | clarithromycin | 500 mg bid  | 6-10d    |

| Authors                    | Country | Jadad score | Study design      | Patients' characteristic |                 |                           |                   |                  |                                                                     |                                         | Treatment      |             |                                               |                     |                |             |     |
|----------------------------|---------|-------------|-------------------|--------------------------|-----------------|---------------------------|-------------------|------------------|---------------------------------------------------------------------|-----------------------------------------|----------------|-------------|-----------------------------------------------|---------------------|----------------|-------------|-----|
|                            |         |             |                   | Treatment                | No. of patients | Age(range) or ± (SD) year | Man/Women (n1/n2) | Follow-up        | Confirmation of <i>H. pylori</i> infection                          | Confirmation of Eradication             | Intervention   | Dosage      | Duration                                      |                     |                |             |     |
| Cindoruk M 2007 (23)       | Turkey  | 5           | RCT               | 14d probiotic            | 62              | 45.82±13.35               | 36/26             | 6 weeks          | endoscopy, biopsy                                                   | <sup>13</sup> C-UBT                     | clarithromycin | 500 mg bid  | 14d                                           |                     |                |             |     |
|                            |         |             |                   |                          |                 |                           |                   |                  |                                                                     |                                         | amoxicillin    | 1000 mg bid | 14d                                           |                     |                |             |     |
|                            |         |             |                   |                          |                 |                           |                   |                  |                                                                     |                                         | lansoprazole   | 30 mg bid   | 14d                                           |                     |                |             |     |
|                            |         |             |                   |                          |                 |                           |                   |                  |                                                                     |                                         |                |             |                                               |                     |                |             |     |
|                            |         |             |                   |                          |                 |                           |                   | 14d triple       | 62                                                                  | 47.56±13.53                             | 18/44          | 6 weeks     | endoscopy, biopsy                             | <sup>13</sup> C-UBT | clarithromycin | 500 mg bid  | 14d |
|                            |         |             |                   |                          |                 |                           |                   |                  |                                                                     |                                         |                |             |                                               |                     | amoxicillin    | 1000 mg bid | 14d |
|                            |         |             |                   |                          |                 |                           |                   |                  |                                                                     |                                         | lansoprazole   | 30 mg bid   | 14d                                           |                     |                |             |     |
| Cuadrado-Lavín A 2012 (24) | Spain   | 3           | single-blind, RCT | 10d triple               | 128             | 42 (19-73)                | 66/62             | 4 weeks          | rapid urease test, histological examination                         | <sup>13</sup> C-UBT                     | clarithromycin | 500 mg bid  | 10d                                           |                     |                |             |     |
|                            |         |             |                   |                          |                 |                           |                   |                  |                                                                     |                                         | omeprazole     | 20 mg bid   | 10d                                           |                     |                |             |     |
|                            |         |             |                   |                          |                 |                           |                   | 10d levofloxacin | 122                                                                 | 44 (18-75)                              | 54/68          | 4 weeks     | rapid urease test, histological examination   | <sup>13</sup> C-UBT | levofloxacin   | 500 mg bid  | 10d |
|                            |         |             |                   |                          |                 |                           |                   |                  |                                                                     |                                         |                |             |                                               |                     | amoxicillin    | 1000 mg bid | 10d |
|                            |         |             |                   |                          |                 |                           |                   |                  |                                                                     |                                         | omeprazole     | 20 mg bid   | 10d                                           |                     |                |             |     |
| Daghaghzadeh H 2007 (25)   | Iran    | 2           | RCT               | 7d bismuth               | 78              | 40.23                     | 36/42             | 4 weeks          | histological examination or rapid urease test                       | <sup>14</sup> C-UBT                     | omeprazole     | 20 mg bid   | 7d                                            |                     |                |             |     |
|                            |         |             |                   |                          |                 |                           |                   |                  |                                                                     |                                         | amoxicillin    | 1000 mg bid | 7d                                            |                     |                |             |     |
|                            |         |             |                   |                          |                 |                           |                   |                  |                                                                     |                                         | bismuth        | 240 mg bid  | 7d                                            |                     |                |             |     |
|                            |         |             |                   |                          |                 |                           |                   |                  |                                                                     |                                         |                |             |                                               |                     | furazolidone   | 200 mg bid  | 7d  |
|                            |         |             |                   |                          |                 |                           |                   | 14d bismuth      | 78                                                                  | 44.84                                   | 41/37          | 4 weeks     | histological examination or rapid urease test | <sup>14</sup> C-UBT | omeprazole     | 20 mg bid   | 14d |
|                            |         |             |                   |                          |                 |                           |                   |                  |                                                                     |                                         |                |             |                                               |                     | amoxicillin    | 1000 mg bid | 14d |
|                            |         |             |                   |                          |                 |                           |                   |                  |                                                                     |                                         | bismuth        | 240 mg bid  | 14d                                           |                     |                |             |     |
|                            |         |             |                   |                          |                 |                           |                   |                  |                                                                     |                                         | furazolidone   | 200 mg bid  | 14d                                           |                     |                |             |     |
| Dal Bo' N 1998 (26)        | Italy   | 2           | RCT               | 14d triple               | 33              | 53.6 (27-74)              | 23/10             | 2 months         | histological examination, rapid urease test, serum <i>H. pylori</i> | serum anti- <i>H. pylori</i> antibodies | omeprazole     | 20 mg bid   | 14d                                           |                     |                |             |     |
|                            |         |             |                   |                          |                 |                           |                   |                  |                                                                     |                                         | clarithromycin | 250 mg bid  | 14d                                           |                     |                |             |     |
|                            |         |             |                   |                          |                 |                           |                   |                  |                                                                     |                                         | metronidazole  | 250 mg qid  | 14d                                           |                     |                |             |     |

| Authors                  | Country    | Jadad score | Study design                    | Patients' characteristic |                                                                  |                                                                  |                   |           |                                                                           |                                                                                | Treatment                               |            |           |    |
|--------------------------|------------|-------------|---------------------------------|--------------------------|------------------------------------------------------------------|------------------------------------------------------------------|-------------------|-----------|---------------------------------------------------------------------------|--------------------------------------------------------------------------------|-----------------------------------------|------------|-----------|----|
|                          |            |             |                                 | Treatment                | No. of patients                                                  | Age(range) or ± (SD) year                                        | Man/Women (n1/n2) | Follow-up | Confirmation of <i>H. pylori</i> infection                                | Confirmation of Eradication                                                    | Intervention                            | Dosage     | Duration  |    |
| Dammann HG 2000 (27)     | Germany    | 4           | double-blind, RCT, multi-center | 7d triple                | 66                                                               | 54.4 (28-76)                                                     | 42/24             | 2 months  | antibodies                                                                | histological examination, rapid urease test, serum <i>H. pylori</i> antibodies | serum anti- <i>H. pylori</i> antibodies | omeprazole | 20 mg bid | 7d |
|                          |            |             |                                 |                          |                                                                  |                                                                  |                   |           | clarithromycin                                                            | 250 mg bid                                                                     | 7d                                      |            |           |    |
|                          |            |             |                                 |                          |                                                                  |                                                                  |                   |           | metronidazole                                                             | 250 mg qid                                                                     | 7d                                      |            |           |    |
|                          |            |             |                                 | 14d triple               | 106                                                              | 49.7±15.1                                                        | 67/39             | 6 weeks   | histological examination, <sup>13</sup> C-UBT, culture, rapid urease test | histological examination, <sup>13</sup> C-UBT, culture, rapid urease test      | pantoprazole                            | 40 mg bid  | 7d        |    |
|                          |            |             |                                 |                          |                                                                  |                                                                  |                   |           | clarithromycin                                                            | 500 mg bid                                                                     | 7d                                      |            |           |    |
|                          |            |             |                                 |                          |                                                                  |                                                                  |                   |           | metronidazole                                                             | 500 mg bid                                                                     | 7d                                      |            |           |    |
| De Francesco V 2004 (28) | Italy      | 3           | RCT                             | 7d triple                | 115                                                              | 47±13.5                                                          | 65/50             | 6–8 weeks | rapid urease test, histological examination, <sup>13</sup> C-UBT          | rapid urease test, histological examination, <sup>13</sup> C-UBT               | rabeprazole                             | 20 mg bid  | 7d        |    |
|                          |            |             |                                 |                          |                                                                  |                                                                  |                   |           | clarithromycin                                                            | 500 mg bid                                                                     | 7d                                      |            |           |    |
|                          |            |             |                                 |                          |                                                                  |                                                                  |                   |           | amoxicillin                                                               | 1000 mg bid                                                                    | 7d                                      |            |           |    |
|                          |            |             |                                 | 10d sequential           | 116                                                              | 46±12.3                                                          | 54/62             | 6–8 weeks | rapid urease test, histological examination, <sup>13</sup> C-UBT          | rapid urease test, histological examination, <sup>13</sup> C-UBT               | rabeprazole                             | 20 mg bid  | 1-5d      |    |
|                          |            |             |                                 |                          |                                                                  |                                                                  |                   |           | amoxicillin                                                               | 1000 mg bid                                                                    | 1-5d                                    |            |           |    |
|                          |            |             |                                 |                          |                                                                  |                                                                  |                   |           | rabeprazole                                                               | 20 mg bid                                                                      | 6-10d                                   |            |           |    |
| clarithromycin           | 500 mg bid | 6-10d       |                                 |                          |                                                                  |                                                                  |                   |           |                                                                           |                                                                                |                                         |            |           |    |
| tinidazole               | 500 mg bid | 6-10d       |                                 |                          |                                                                  |                                                                  |                   |           |                                                                           |                                                                                |                                         |            |           |    |
| 10d triple               | 116        | 49±13.8     | 57/59                           | 6–8 weeks                | rapid urease test, histological examination, <sup>13</sup> C-UBT | rapid urease test, histological examination, <sup>13</sup> C-UBT | rabeprazole       | 20 mg bid | 10d                                                                       |                                                                                |                                         |            |           |    |

| Authors                     | Country | Jadad score | Study design | Patients' characteristic |                 |                           |                   |           |                                                                                        |                                                     | Treatment                                                        |                             |          |
|-----------------------------|---------|-------------|--------------|--------------------------|-----------------|---------------------------|-------------------|-----------|----------------------------------------------------------------------------------------|-----------------------------------------------------|------------------------------------------------------------------|-----------------------------|----------|
|                             |         |             |              | Treatment                | No. of patients | Age(range) or ± (SD) year | Man/Women (n1/n2) | Follow-up | Confirmation of <i>H. pylori</i> infection                                             | Confirmation of Eradication                         | Intervention                                                     | Dosage                      | Duration |
| De Francesco V<br>2004 (29) | Italy   | 3           | RCT          | 10d sequential           | 45              | 44.2±16.2                 | 20/25             | 6–8 weeks | histological examination, <sup>13</sup> C-UBT                                          | test, histological examination, <sup>13</sup> C-UBT | clarithromycin                                                   | 500 mg bid                  | 10d      |
|                             |         |             |              |                          |                 |                           |                   |           | histological examination, rapid urease test, <sup>13</sup> C-UBT                       | <sup>13</sup> C-UBT                                 | amoxicillin                                                      | 1000 mg bid                 | 10d      |
|                             |         |             |              |                          |                 |                           |                   |           | histological examination, rapid urease test, <sup>13</sup> C-UBT                       | <sup>13</sup> C-UBT                                 | rabeprazole                                                      | 20 mg bid                   | 1-5d     |
|                             |         |             |              | 10d triple               | 52              | 46.0±15.3                 | 21/31             | 6–8 weeks | histological examination, rapid urease test, <sup>13</sup> C-UBT                       | <sup>13</sup> C-UBT                                 | amoxicillin                                                      | 1000 mg bid                 | 1-5d     |
|                             |         |             |              |                          |                 |                           |                   |           | histological examination, rapid urease test, <sup>13</sup> C-UBT                       | <sup>13</sup> C-UBT                                 | rabeprazole                                                      | 20 mg bid                   | 6-10d    |
|                             |         |             |              |                          |                 |                           |                   |           | histological examination, rapid urease test, <sup>13</sup> C-UBT                       | <sup>13</sup> C-UBT                                 | tinidazole                                                       | 500 mg bid                  | 6-10d    |
| Deguchi R<br>2012 (30)      | Japan   | 3           | RCT          | 7d probiotic             | 115             | 55.9                      | 76/39             | 8 weeks   | culture, histological examination, rapid urease test                                   | <sup>13</sup> C-UBT, stool antigen test             | clarithromycin                                                   | 500 mg bid                  | 6-10d    |
|                             |         |             |              |                          |                 |                           |                   |           | culture, histological examination, rapid urease test                                   | <sup>13</sup> C-UBT, stool antigen test             | amoxicillin                                                      | 750 mg bid                  | 10d      |
|                             |         |             |              |                          |                 |                           |                   |           | culture, histological examination, rapid urease test                                   | <sup>13</sup> C-UBT, stool antigen test             | clarithromycin                                                   | 200 mg bid                  | 10d      |
|                             |         |             |              | 7d triple                | 114             | 57.8                      | 66/48             | 8 weeks   | culture, histological examination, rapid urease test                                   | <sup>13</sup> C-UBT, stool antigen test             | yogurt containing Lactobacillus gasseri OLL2716                  | 112 ×10 <sup>3</sup> mg bid | 4 weeks  |
|                             |         |             |              |                          |                 |                           |                   |           | culture, histological examination, rapid urease test                                   | <sup>13</sup> C-UBT, stool antigen test             | rabeprazole                                                      | 10 mg bid                   | 7d       |
|                             |         |             |              |                          |                 |                           |                   |           | culture, histological examination, rapid urease test                                   | <sup>13</sup> C-UBT, stool antigen test             | amoxicillin                                                      | 750 mg bid                  | 7d       |
| Du YQ<br>2012 (31)          | China   | 3           | RCT          | 7d probiotic             | 76              | 44.9±13.8                 | 32/44             | 4 weeks   | <sup>13</sup> C-UBT, <sup>14</sup> C-UBT, rapid urease test, or pathologic examination | <sup>13</sup> C-UBT, or <sup>14</sup> C-UBT         | clarithromycin                                                   | 200 mg bid                  | 7d       |
|                             |         |             |              |                          |                 |                           |                   |           | <sup>13</sup> C-UBT, <sup>14</sup> C-UBT, rapid urease test, or pathologic examination | <sup>13</sup> C-UBT, or <sup>14</sup> C-UBT         | probiotic containing 3×10 <sup>7</sup> Lactobacillus acidophilus | qd                          | 1-14d    |

| Authors             | Country | Jadad score      | Study design | Patients' characteristic |                                  |                               |                    | Treatment   |                                                                                        |                                             |                                                                           |             |          |
|---------------------|---------|------------------|--------------|--------------------------|----------------------------------|-------------------------------|--------------------|-------------|----------------------------------------------------------------------------------------|---------------------------------------------|---------------------------------------------------------------------------|-------------|----------|
|                     |         |                  |              | Treatment                | No. of patients                  | Age(range) or $\pm$ (SD) year | Man/Women (n1/n2)  | Follow-up   | Confirmation of <i>H. pylori</i> infection                                             | Confirmation of Eradication                 | Intervention                                                              | Dosage      | Duration |
| Fakheri H 2012 (32) | Iran    | 3                | RCT          | 7d triple                | 78                               | 48.0 $\pm$ 13.3               | 33/45              | 4 weeks     | <sup>13</sup> C-UBT, <sup>14</sup> C-UBT, rapid urease test, or pathologic examination | <sup>13</sup> C-UBT, or <sup>14</sup> C-UBT | omeprazole                                                                | 20 mg bid   | 15-21d   |
|                     |         |                  |              |                          |                                  |                               |                    |             |                                                                                        |                                             | clarithromycin                                                            | 500 mg bid  | 15-21d   |
|                     |         |                  |              |                          |                                  |                               |                    |             |                                                                                        |                                             | amoxicillin                                                               | 1000 mg bid | 15-21d   |
|                     |         |                  |              |                          |                                  |                               |                    |             |                                                                                        |                                             | omeprazole                                                                | 20 mg bid   | 7d       |
|                     |         |                  |              |                          |                                  |                               |                    |             |                                                                                        |                                             | clarithromycin                                                            | 500 mg bid  | 7d       |
|                     |         |                  |              | 7d probiotic             | 74                               | 48.2 $\pm$ 12.2               | 26/48              | 4 weeks     | <sup>13</sup> C-UBT, <sup>14</sup> C-UBT, rapid urease test, or pathologic examination | <sup>13</sup> C-UBT, or <sup>14</sup> C-UBT | omeprazole                                                                | 20 mg bid   | 1-7d     |
|                     |         |                  |              |                          |                                  |                               |                    |             |                                                                                        |                                             | clarithromycin                                                            | 500 mg bid  | 1-7d     |
|                     |         |                  |              |                          |                                  |                               |                    |             |                                                                                        |                                             | amoxicillin                                                               | 1000 mg bid | 1-7d     |
|                     |         |                  |              |                          |                                  |                               |                    |             |                                                                                        |                                             | probiotic containing 3 $\times$ 10 <sup>7</sup> Lactobacillus acidophilus | qd          | 8-21d    |
|                     |         |                  |              |                          |                                  |                               |                    |             |                                                                                        |                                             | antiprimary                                                               | 40 mg bid   | 1-5d     |
| 10d sequential      | 148     | 39.8 $\pm$ 12.88 | 79/69        | 8 weeks                  | antral biopsy, rapid urease test | <sup>14</sup> C-UBT           | amoxicillin        | 1000 mg bid | 1-5d                                                                                   |                                             |                                                                           |             |          |
|                     |         |                  |              |                          |                                  |                               | pantoprazole       | 40 mg bid   | 6-10d                                                                                  |                                             |                                                                           |             |          |
|                     |         |                  |              |                          |                                  |                               | clarithromycin     | 500 mg bid  | 6-10d                                                                                  |                                             |                                                                           |             |          |
|                     |         |                  |              |                          |                                  |                               | tinidazole         | 500 mg bid  | 6-10d                                                                                  |                                             |                                                                           |             |          |
|                     |         |                  |              |                          |                                  |                               | antiprimary        | 40 mg bid   | 14d                                                                                    |                                             |                                                                           |             |          |
| 14d bismuth         | 148     | 38.0 $\pm$ 11.24 | 82/66        | 8 weeks                  | antral biopsy, rapid urease test | <sup>14</sup> C-UBT           | amoxicillin        | 1000 mg bid | 14d                                                                                    |                                             |                                                                           |             |          |
|                     |         |                  |              |                          |                                  |                               | bismuth subcitrate | 240 mg bid  | 14d                                                                                    |                                             |                                                                           |             |          |
|                     |         |                  |              |                          |                                  |                               | furazolidone       | 200 mg bid  | 1-7d                                                                                   |                                             |                                                                           |             |          |
|                     |         |                  |              |                          |                                  |                               |                    |             |                                                                                        |                                             |                                                                           |             |          |

| Authors                           | Country    | Jadad score | Study design | Patients' characteristic    |                 |                           |                   |            |                                                                    |                                                                    | Treatment             |             |          |
|-----------------------------------|------------|-------------|--------------|-----------------------------|-----------------|---------------------------|-------------------|------------|--------------------------------------------------------------------|--------------------------------------------------------------------|-----------------------|-------------|----------|
|                                   |            |             |              | Treatment                   | No. of patients | Age(range) or ± (SD) year | Man/Women (n1/n2) | Follow-up  | Confirmation of <i>H. pylori</i> infection                         | Confirmation of Eradication                                        | Intervention          | Dosage      | Duration |
| Fakheri HT<br>2011 (33)           | Iran       | 2           | RCT          | 14d<br>concomitant          | 80              | 37.48±11.6                | 53/27             | 12 weeks   | rapid urease test,<br>biopsy                                       | <sup>14</sup> C-UBT                                                | omeprazole            | 20 mg bid   | 14d      |
|                                   |            |             |              |                             |                 |                           |                   |            |                                                                    |                                                                    | amoxicillin           | 1000 mg bid | 14d      |
|                                   |            |             |              |                             |                 |                           |                   |            |                                                                    |                                                                    | metronidazole         | 500 mg bid  | 14d      |
|                                   |            |             |              | 14d bismuth                 | 80              | 35.34±10.5                | 52/28             | 12 weeks   | rapid urease test,<br>biopsy                                       | <sup>14</sup> C-UBT                                                | omeprazole            | 20 mg bid   | 14d      |
|                                   |            |             |              |                             |                 |                           |                   |            |                                                                    |                                                                    | amoxicillin           | 1000 mg bid | 14d      |
|                                   |            |             |              |                             |                 |                           |                   |            |                                                                    |                                                                    | bismuth<br>subcitrate | 240 mg bid  | 14d      |
| furazolidone                      | 200 mg bid | 1-7d        |              |                             |                 |                           |                   |            |                                                                    |                                                                    |                       |             |          |
| Fallone CA<br>2013 (34)           | Canada     | 1           | RCT          | 7d triple                   | 148             | 60±14                     | 53/95             | 4 weeks    | histological<br>examination, UBT                                   | histological<br>examination,<br>UBT                                | amoxicillin           | 1000 mg bid | 7d       |
|                                   |            |             |              |                             |                 |                           |                   |            |                                                                    |                                                                    | clarithromycin        | 500 mg bid  | 7d       |
|                                   |            |             |              | 14d triple                  | 166             | 61±13                     | 79/87             | 4 weeks    | histological<br>examination, UBT                                   | histological<br>examination,<br>UBT                                | amoxicillin           | 1000 mg bid | 14d      |
|                                   |            |             |              |                             |                 |                           |                   |            |                                                                    |                                                                    | clarithromycin        | 500 mg bid  | 14d      |
| lansoprazole                      | 30 mg bid  | 14d         |              |                             |                 |                           |                   |            |                                                                    |                                                                    |                       |             |          |
| Farup PG<br>2002 (35)             | Norway     | 3           | RCT          | 7d triple                   | 137             | 59±14                     | 82/55             | 7-14 weeks | UBT                                                                | UBT                                                                | omeprazole            | 20 mg bid   | 7d       |
|                                   |            |             |              |                             |                 |                           |                   |            |                                                                    |                                                                    | clarithromycin        | 250 mg bid  | 7d       |
|                                   |            |             |              |                             |                 |                           |                   |            |                                                                    |                                                                    | metronidazole         | 500 mg bid  | 7d       |
|                                   |            |             |              | 7d<br>ranitidine<br>bismuth | 146             | 58±14                     | 76/70             | 7-14 weeks | UBT                                                                | UBT                                                                | ranitidine            | 400 mg bid  | 7d       |
|                                   |            |             |              |                             |                 |                           |                   |            |                                                                    |                                                                    | bismuth citrate       |             |          |
|                                   |            |             |              |                             |                 |                           |                   |            |                                                                    |                                                                    | clarithromycin        | 250 mg bid  | 7d       |
| metronidazole                     | 500 mg bid | 7d          |              |                             |                 |                           |                   |            |                                                                    |                                                                    |                       |             |          |
| Filipec<br>Kanizaj T<br>2009 (36) | Croatia    | 3           | RCT          | 7d triple                   | 120             | 52.6±12.8                 | 56/64             | 4-6 weeks  | histological<br>examination,<br>microbiology,<br>rapid urease test | histological<br>examination,<br>microbiology,<br>rapid urease test | pantoprazole          | 40 mg bid   | 7d       |
|                                   |            |             |              |                             |                 |                           |                   |            |                                                                    |                                                                    | amoxicillin           | 1000 mg bid | 7d       |
|                                   |            |             |              |                             |                 |                           |                   |            |                                                                    |                                                                    | clarithromycin        | 500 mg bid  | 7d       |

| Authors                 | Country | Jadad score | Study design              | Patients' characteristic |                 |                           |                   |           |                                                                  | Treatment                                                 |                                                                                    |                |                |            |       |
|-------------------------|---------|-------------|---------------------------|--------------------------|-----------------|---------------------------|-------------------|-----------|------------------------------------------------------------------|-----------------------------------------------------------|------------------------------------------------------------------------------------|----------------|----------------|------------|-------|
|                         |         |             |                           | Treatment                | No. of patients | Age(range) or ± (SD) year | Man/Women (n1/n2) | Follow-up | Confirmation of <i>H. pylori</i> infection                       | Confirmation of Eradication                               | Intervention                                                                       | Dosage         | Duration       |            |       |
| Francavilla R 2013 (37) | Italy   | 5           | double-blind, RCT         | 10d triple               | 118             | 51.3±13.0                 | 70/48             | 4-6 weeks | histological examination, microbiology, rapid urease test        | histological examination, microbiology, rapid urease test | pantoprazole                                                                       | 40 mg bid      | 10d            |            |       |
|                         |         |             |                           |                          |                 |                           |                   |           |                                                                  |                                                           | amoxicillin                                                                        | 1000 mg bid    | 10d            |            |       |
|                         |         |             |                           |                          |                 |                           |                   |           |                                                                  |                                                           |                                                                                    | clarithromycin | 500 mg bid     | 10d        |       |
|                         |         |             |                           | 14d triple               | 57              | 48.8±13.3                 | 29/28             | 4-6 weeks | histological examination, microbiology, rapid urease test        | histological examination, microbiology, rapid urease test | pantoprazole                                                                       | 40 mg bid      | 14d            |            |       |
|                         |         |             |                           |                          |                 |                           |                   |           |                                                                  |                                                           |                                                                                    | amoxicillin    | 1000 mg bid    | 14d        |       |
|                         |         |             |                           |                          |                 |                           |                   |           |                                                                  |                                                           |                                                                                    | clarithromycin | 500 mg bid     | 14d        |       |
| Francavilla R 2013 (37) | Italy   | 5           | double-blind, RCT         | 7d probiotic             | 50              | 49 (22-65)                | 18/32             | 8 weeks   | <sup>13</sup> C-UBT, rapid urease test, histological examination | <sup>13</sup> C-UBT                                       | Gastrus Lactobacillus reuteri combination (2*10 <sup>8</sup> Colony Forming Units) | qd             | pre-treatment  |            |       |
|                         |         |             |                           |                          |                 |                           |                   |           |                                                                  |                                                           | PPI                                                                                | NA             | 7d             |            |       |
|                         |         |             |                           |                          |                 |                           |                   |           |                                                                  |                                                           |                                                                                    | clarithromycin | NA             | 7d         |       |
|                         |         |             |                           |                          |                 |                           |                   |           |                                                                  |                                                           |                                                                                    | amoxicillin    | NA             | 7d         |       |
| Francavilla R 2013 (37) | Italy   | 5           | double-blind, RCT         | 7d triple                | 50              | 44 (18-61)                | 21/29             | 8 weeks   | <sup>13</sup> C-UBT, rapid urease test, histological examination | <sup>13</sup> C-UBT                                       | PPI                                                                                | NA             | 7d             |            |       |
|                         |         |             |                           |                          |                 |                           |                   |           |                                                                  |                                                           |                                                                                    | clarithromycin | NA             | 7d         |       |
|                         |         |             |                           |                          |                 |                           |                   |           |                                                                  |                                                           |                                                                                    |                | amoxicillin    | NA         | 7d    |
|                         |         |             |                           |                          |                 |                           |                   |           |                                                                  |                                                           |                                                                                    |                |                |            |       |
| Gao XZ 2010 (38)        | China   | 3           | parallel, open-label, RCT | 10d                      | 72              | 47±13                     | 35/37             | 4-6 weeks | histological examination, rapid urease test                      | <sup>13</sup> C-UBT                                       | omeprazole                                                                         | 20 mg bid      | 1-5d           |            |       |
|                         |         |             |                           |                          |                 |                           |                   |           |                                                                  |                                                           |                                                                                    | amoxicillin    | 1000 mg bid    | 1-5d       |       |
|                         |         |             |                           |                          |                 |                           |                   |           |                                                                  |                                                           |                                                                                    |                | omeprazole     | 20 mg bid  | 6-10d |
|                         |         |             |                           |                          |                 |                           |                   |           |                                                                  |                                                           |                                                                                    |                | tinidazole     | 500 mg bid | 6-10d |
|                         |         |             |                           |                          |                 |                           |                   |           |                                                                  |                                                           |                                                                                    |                | clarithromycin | 500 mg bid | 6-10d |
| Gao XZ 2010 (38)        | China   | 3           | parallel, open-label, RCT | 7d triple                | 71              | 43±15                     | 34/37             | 4-6 weeks | histological                                                     | <sup>13</sup> C-UBT                                       | omeprazole                                                                         | 20 mg bid      | 7d             |            |       |

| Authors                    | Country | Jadad score | Study design                                                     | Patients' characteristic |                 |                               |                                                                  |                     |                                                                  | Treatment                   |                |             |          |
|----------------------------|---------|-------------|------------------------------------------------------------------|--------------------------|-----------------|-------------------------------|------------------------------------------------------------------|---------------------|------------------------------------------------------------------|-----------------------------|----------------|-------------|----------|
|                            |         |             |                                                                  | Treatment                | No. of patients | Age(range) or $\pm$ (SD) year | Man/Women (n1/n2)                                                | Follow-up           | Confirmation of <i>H. pylori</i> infection                       | Confirmation of Eradication | Intervention   | Dosage      | Duration |
| Garza González E 2007 (39) | Mexico  | 1           | RCT                                                              | 10d bismuth              | 72              | 45 $\pm$ 10                   | 31/41                                                            | 4-6 weeks           | examination, rapid urease test                                   | <sup>13</sup> C-UBT         | amoxicillin    | 1000 mg bid | 7d       |
|                            |         |             |                                                                  |                          |                 |                               |                                                                  |                     |                                                                  |                             | clarithromycin | 500 mg bid  | 7d       |
|                            |         |             |                                                                  |                          |                 |                               |                                                                  |                     |                                                                  |                             | rabeprazole    | 20 mg bid   | 10d      |
|                            |         |             |                                                                  | 7d triple                | 30              | 4 weeks                       | culture, rapid urease test, histological examination             | stool antigen       | amoxicillin                                                      | 1000 mg bid                 | 10d            |             |          |
|                            |         |             |                                                                  |                          |                 |                               |                                                                  |                     | bismuth pectin                                                   | 100 mg qid                  | 10d            |             |          |
|                            |         |             |                                                                  |                          |                 |                               |                                                                  |                     | levofloxacin                                                     | 500 mg qd                   | 10d            |             |          |
| 14d triple                 | 29      | 4 weeks     | culture, rapid urease test, histological examination             | stool antigen            | rabeprazole     | 20 mg qd                      | 14d                                                              |                     |                                                                  |                             |                |             |          |
|                            |         |             |                                                                  |                          | clarithromycin  | 500 mg bid                    | 14d                                                              |                     |                                                                  |                             |                |             |          |
|                            |         |             |                                                                  |                          | amoxicillin     | 1000 mg bid                   | 14d                                                              |                     |                                                                  |                             |                |             |          |
| Georgopoulos S 2013 (40)   | Greece  | 3           | open-label, RCT                                                  | 10d concomitant          | 127             | 44.8 $\pm$ 16.9               | 69/58                                                            | 46-56 days          | rapid urease test, histological examination, <sup>13</sup> C-UBT | <sup>13</sup> C-UBT         | esomeprazole   | 40 mg bid   | 10d      |
|                            |         |             |                                                                  |                          |                 |                               |                                                                  |                     |                                                                  |                             | metronidazole  | 500 mg bid  | 10d      |
|                            |         |             |                                                                  |                          |                 |                               |                                                                  |                     |                                                                  |                             | clarithromycin | 500 mg bid  | 10d      |
|                            |         |             |                                                                  | 10d triple               | 130             | 46-56 days                    | rapid urease test, histological examination, <sup>13</sup> C-UBT | <sup>13</sup> C-UBT | amoxicillin                                                      | 1000 mg bid                 | 10d            |             |          |
|                            |         |             |                                                                  |                          |                 |                               |                                                                  |                     | esomeprazole                                                     | 40 mg bid                   | 10d            |             |          |
|                            |         |             |                                                                  |                          |                 |                               |                                                                  |                     | clarithromycin                                                   | 500 mg bid                  | 10d            |             |          |
| 7d triple                  | 75      | 4 weeks     | histological examination, rapid urease test, <sup>13</sup> C-UBT | <sup>13</sup> C-UBT      | pantoprazole    | 40 mg bid                     | 7d                                                               |                     |                                                                  |                             |                |             |          |
|                            |         |             |                                                                  |                          | amoxicillin     | 1000 mg bid                   | 7d                                                               |                     |                                                                  |                             |                |             |          |
|                            |         |             |                                                                  |                          | clarithromycin  | 500 mg bid                    | 7d                                                               |                     |                                                                  |                             |                |             |          |



| Authors              | Country | Jadad score | Study design            | Patients' characteristic |                 |                               |                   |           |                                                                  |                             | Treatment                                                                     |                        |          |         |                                                                  |                     |                |            |    |
|----------------------|---------|-------------|-------------------------|--------------------------|-----------------|-------------------------------|-------------------|-----------|------------------------------------------------------------------|-----------------------------|-------------------------------------------------------------------------------|------------------------|----------|---------|------------------------------------------------------------------|---------------------|----------------|------------|----|
|                      |         |             |                         | Treatment                | No. of patients | Age(range) or $\pm$ (SD) year | Man/Women (n1/n2) | Follow-up | Confirmation of <i>H. pylori</i> infection                       | Confirmation of Eradication | Intervention                                                                  | Dosage                 | Duration |         |                                                                  |                     |                |            |    |
| Gisbert JP 2005 (42) | Spain   | 3           | open, multi-center, RCT | 7d                       | 75              | 45 $\pm$ 11                   | 43/32             | 4 weeks   | histological examination, rapid urease test, <sup>13</sup> C-UBT | <sup>13</sup> C-UBT         | ranitidine                                                                    | 400 mg bid             | 7d       |         |                                                                  |                     |                |            |    |
|                      |         |             |                         | ranitidine bismuth       |                 |                               |                   |           |                                                                  |                             | bismuth citrate                                                               |                        |          |         |                                                                  |                     |                |            |    |
|                      |         |             |                         | 7d triple                |                 |                               |                   |           |                                                                  |                             | 150                                                                           | 51.5 $\pm$ 10          | 74/76    | 8 weeks | histological examination, rapid urease test, <sup>13</sup> C-UBT | <sup>13</sup> C-UBT | esomeprazole   | 40 mg bid  | 7d |
|                      |         |             |                         | 10d triple               |                 |                               |                   |           |                                                                  |                             | 150                                                                           | 49.6 $\pm$ 12          | 67/83    | 8 weeks | histological examination, rapid urease test, <sup>13</sup> C-UBT | <sup>13</sup> C-UBT | clarithromycin | 500 mg bid | 7d |
| Gisbert JP 2001 (43) | Spain   | 1           | RCT                     | 7d triple                | 297             | NA                            | NA                | 4 weeks   | histological examination, rapid urease test, <sup>13</sup> C-UBT | <sup>13</sup> C-UBT         | PPI(omeprazole 20 mg bid , lansoprazole 30 mg bid, or pantoprazole 40 mg bid) |                        |          |         |                                                                  |                     |                |            |    |
|                      |         |             |                         |                          |                 |                               |                   |           |                                                                  |                             | clarithromycin                                                                | 500 mg bid             | 7d       |         |                                                                  |                     |                |            |    |
|                      |         |             |                         |                          |                 |                               |                   |           |                                                                  |                             | amoxicillin/ metronidazole                                                    | 1000 mg bid/500 mg bid | 7d       |         |                                                                  |                     |                |            |    |
|                      |         |             |                         | 7d                       |                 |                               |                   |           |                                                                  |                             | 79                                                                            |                        |          | 4 weeks | histological examination, rapid urease test, <sup>13</sup> C-UBT | <sup>13</sup> C-UBT | ranitidine     | 400 mg bid | 7d |
| Gopal R              | India   | 3           | RCT                     | 10d triple               | 39              | 38 $\pm$ 11.99                | 37/2              | 3 months  | urease test,                                                     | urease test,                | clarithromycin                                                                | 500 mg bid             | 7d       |         |                                                                  |                     |                |            |    |
|                      |         |             |                         |                          |                 |                               |                   |           |                                                                  |                             | amoxicillin                                                                   | 1000 mg bid            | 7d       |         |                                                                  |                     |                |            |    |

| Authors                | Country       | Jadad score    | Study design  | Patients' characteristic |                 |                           |                   |             |                                            | Treatment                   |                |             |             |                          |                          |              |             |       |
|------------------------|---------------|----------------|---------------|--------------------------|-----------------|---------------------------|-------------------|-------------|--------------------------------------------|-----------------------------|----------------|-------------|-------------|--------------------------|--------------------------|--------------|-------------|-------|
|                        |               |                |               | Treatment                | No. of patients | Age(range) or ± (SD) year | Man/Women (n1/n2) | Follow-up   | Confirmation of <i>H. pylori</i> infection | Confirmation of Eradication | Intervention   | Dosage      | Duration    |                          |                          |              |             |       |
| 2013 (44)              |               |                |               |                          |                 |                           |                   |             | histological examination                   | histological examination    | clarithromycin | 500 mg bid  | 10d         |                          |                          |              |             |       |
|                        |               |                |               |                          |                 |                           |                   |             |                                            |                             |                |             |             |                          | omeprazole               | 20 mg bid    | 10d         |       |
|                        |               |                |               |                          |                 |                           |                   |             | 10d                                        | 35                          | 43± 12.25      | 34/1        | 3 months    | urease test,             | urease test,             | amoxicillin  | 1000 mg bid | 10d   |
|                        |               |                |               |                          |                 |                           |                   |             | levofloxacin                               |                             |                |             |             | histological examination | histological examination | levofloxacin | 500 mg bid  | 10d   |
| Greenberg ER 2011 (45) | South America | 3              | RCT           | 14d triple               | 488             |                           | 201/287           | 6-8 weeks   | <sup>13</sup> C-UBT                        | <sup>13</sup> C-UBT         | lansoprazole   | 30 mg bid   | 14d         |                          |                          |              |             |       |
|                        |               |                |               |                          |                 |                           |                   |             |                                            |                             | amoxicillin    | 1000 mg bid | 14d         |                          |                          |              |             |       |
|                        |               |                |               |                          |                 |                           |                   |             |                                            |                             | clarithromycin | 500 mg bid  | 14d         |                          |                          |              |             |       |
|                        |               |                |               |                          |                 |                           |                   |             | 10d                                        | 486                         | 21-65          | 200/286     | 6-8 weeks   | <sup>13</sup> C-UBT      | <sup>13</sup> C-UBT      | lansoprazole | 30 mg bid   | 1-5d  |
|                        |               |                |               |                          |                 |                           |                   |             | sequential                                 |                             |                |             |             |                          |                          | amoxicillin  | 1000 mg bid | 1-5d  |
|                        |               |                |               |                          |                 |                           |                   |             |                                            |                             |                |             |             |                          |                          | lansoprazole | 30 mg bid   | 6-10d |
|                        |               | clarithromycin | 500 mg bid    | 6-10d                    |                 |                           |                   |             |                                            |                             |                |             |             |                          |                          |              |             |       |
| Gumurdulu Y 2004 (46)  | Turkey        | 1              | RCT           | 7d triple                | 53              | 49±12                     | 23/30             | 45- 60 days | endoscopy,                                 | endoscopy,                  | omeprazole     | 20 mg bid   | 7d          |                          |                          |              |             |       |
|                        |               |                |               |                          |                 |                           |                   |             | histological examination                   | histological examination    | clarithromycin | 500 mg bid  | 7d          |                          |                          |              |             |       |
|                        |               |                |               |                          |                 |                           |                   |             |                                            |                             | amoxicillin    | 1000 mg bid | 7d          |                          |                          |              |             |       |
|                        |               |                |               |                          |                 |                           |                   |             | 14d triple                                 | 59                          | 48±11          | 24/35       | 45- 60 days | endoscopy,               | endoscopy,               | omeprazole   | 20 mg bid   | 14d   |
|                        |               |                |               |                          |                 |                           |                   |             | histological examination                   | histological examination    | clarithromycin | 500 mg bid  | 14d         |                          |                          |              |             |       |
|                        |               |                |               |                          |                 |                           |                   |             |                                            |                             | amoxicillin    | 1000 mg bid | 14d         |                          |                          |              |             |       |
|                        |               |                |               | 10d bismuth              | 52              | 45±12                     | 21/31             | 45-60 days  | endoscopy,                                 | endoscopy,                  | omeprazole     | 20 mg bid   | 10d         |                          |                          |              |             |       |
|                        |               |                |               |                          |                 |                           |                   |             | histological examination                   | histological examination    | bismute        | 300 mg qid  | 10d         |                          |                          |              |             |       |
|                        |               |                |               |                          |                 |                           | tetracycline      | 500 mg qid  | 10d                                        |                             |                |             |             |                          |                          |              |             |       |
|                        |               |                |               |                          |                 |                           | metronidazole     | 500 mg qid  | 10d                                        |                             |                |             |             |                          |                          |              |             |       |
| Hu FL 2012             | China         | 2              | multi-center, | 7d triple                | 100             | 44±13                     | 68/32             | 28 days     | rapid urease test,                         | <sup>13</sup> C-UBT         | lansoprazole   | 30 mg bid   | 7d          |                          |                          |              |             |       |

| Authors            | Country | Jadad score | Study design | Patients' characteristic |                 |                               |                   |           |                                                      | Treatment                      |                   |             |          |
|--------------------|---------|-------------|--------------|--------------------------|-----------------|-------------------------------|-------------------|-----------|------------------------------------------------------|--------------------------------|-------------------|-------------|----------|
|                    |         |             |              | Treatment                | No. of patients | Age(range) or $\pm$ (SD) year | Man/Women (n1/n2) | Follow-up | Confirmation of <i>H. pylori</i> infection           | Confirmation of Eradication    | Intervention      | Dosage      | Duration |
| (47)               |         |             | RCT          |                          |                 |                               |                   |           | UBT, gastroscop                                      |                                | amoxicillin       | 1000 mg bid | 7d       |
|                    |         |             |              |                          |                 |                               |                   |           |                                                      |                                | clarithromycin    | 500 mg bid  | 7d       |
|                    |         |             |              | 7d bismuth               | 101             | 42 $\pm$ 13                   | 71/40             | 28 days   | rapid urease test, UBT, gastroscop                   | <sup>13</sup> C-UBT            | lansoprazole      | 30 mg bid   | 21d      |
|                    |         |             |              |                          |                 |                               |                   |           |                                                      |                                | amoxicillin       | 1000 mg bid | 7d       |
|                    |         |             |              |                          |                 |                               |                   |           |                                                      |                                | clarithromycin    | 500 mg bid  | 7d       |
|                    |         |             |              |                          |                 |                               |                   |           |                                                      |                                | bismuth           | 220 mg bid  | 21d      |
|                    |         |             |              |                          |                 |                               |                   |           |                                                      |                                | potassium citrate |             |          |
| Hu SQ 2009 (48)    | China   | 3           | RCT          | 10d sequential           | 39              | 46.72 $\pm$ 6.23              | 22/17             | 4 weeks   | histological examination, rapid urease test          | <sup>13</sup> C-UBT            | esomeprazole      | 20 mg bid   | 1-5d     |
|                    |         |             |              |                          |                 |                               |                   |           |                                                      |                                | amoxicillin       | 1000 mg bid | 1-5d     |
|                    |         |             |              |                          |                 |                               |                   |           |                                                      |                                | esomeprazole      | 20 mg bid   | 6-10d    |
|                    |         |             |              |                          |                 |                               |                   |           |                                                      |                                | clarithromycin    | 500 mg bid  | 6-10d    |
|                    |         |             |              |                          |                 |                               |                   |           |                                                      |                                | tinidazole        | 500 mg bid  | 6-10d    |
|                    |         |             |              | 7d triple                | 40              | 46.81 $\pm$ 7.13              | 21/19             | 4 weeks   | histological examination, rapid urease test          | <sup>13</sup> C-UBT            | esomeprazole      | 20 mg bid   | 7d       |
|                    |         |             |              |                          |                 |                               |                   |           |                                                      |                                | clarithromycin    | 500 mg bid  | 7d       |
|                    |         |             |              |                          |                 |                               |                   |           |                                                      |                                | amoxicillin       | 1000 mg bid | 7d       |
| Huang YK 2012 (49) | Taiwan  | 3           | RCT          | 10d sequential           | 85              | 51.31 $\pm$ 15.02             | 48/37             | 12 weeks  | culture, histological examination, rapid urease test | endoscopy, <sup>13</sup> C-UBT | lansoprazole      | 30 mg bid   | 10d      |
|                    |         |             |              |                          |                 |                               |                   |           |                                                      |                                | amoxicillin       | 1000 mg bid | 1-5d     |
|                    |         |             |              |                          |                 |                               |                   |           |                                                      |                                | clarithromycin    | 500 mg bid  | 6-10d    |
|                    |         |             |              |                          |                 |                               |                   |           |                                                      |                                | metronidazole     | 500 mg bid  | 6-10d    |
|                    |         |             |              | 10d concomitant          | 84              | 53.82 $\pm$ 15.20             | 48/36             | 12 weeks  | culture, histological examination, rapid urease test | endoscopy, <sup>13</sup> C-UBT | lansoprazole      | 30 mg bid   | 10d      |
|                    |         |             |              |                          |                 |                               |                   |           |                                                      |                                | amoxicillin       | 1000 mg bid | 10d      |
|                    |         |             |              |                          |                 |                               |                   |           |                                                      |                                | clarithromycin    | 500 mg bid  | 10d      |
|                    |         |             |              |                          |                 |                               |                   |           |                                                      |                                | metronidazole     | 500 mg bid  | 10d      |

| Authors                      | Country            | Jadad score | Study design         | Patients' characteristic |                 |                           |                   |           |                                                                                          |                                                                 | Treatment      |                |            |    |
|------------------------------|--------------------|-------------|----------------------|--------------------------|-----------------|---------------------------|-------------------|-----------|------------------------------------------------------------------------------------------|-----------------------------------------------------------------|----------------|----------------|------------|----|
|                              |                    |             |                      | Treatment                | No. of patients | Age(range) or ± (SD) year | Man/Women (n1/n2) | Follow-up | Confirmation of <i>H. pylori</i> infection                                               | Confirmation of Eradication                                     | Intervention   | Dosage         | Duration   |    |
| Hung IF<br>2009 (50)         | China              | 2           | open-label,<br>RCT   | 7d<br>levofloxacin       | 150             | 53.6±15.5                 | 65/ 85            | 6 weeks   | rapid urease test,<br>histological<br>examination                                        | <sup>13</sup> C-UBT                                             | esomeprazole   | 20 mg bid      | 7d         |    |
|                              |                    |             |                      |                          |                 |                           |                   |           |                                                                                          |                                                                 | amoxicillin    | 1000 mg bid    | 7d         |    |
|                              |                    |             |                      |                          |                 |                           |                   |           |                                                                                          |                                                                 |                | levofloxacin   | 500 mg qd  | 7d |
|                              |                    |             |                      | 7d triple                | 150             | 52.4±14.0                 | 54/ 96            | 6 weeks   | rapid urease test,<br>histological<br>examination                                        | <sup>13</sup> C-UBT                                             | esomeprazole   | 20 mg bid      | 7d         |    |
|                              |                    |             |                      |                          |                 |                           |                   |           | amoxicillin                                                                              | 1000 mg bid                                                     | 7d             |                |            |    |
|                              |                    |             |                      |                          |                 |                           |                   |           |                                                                                          | clarithromycin                                                  | 500 mg bid     | 7d             |            |    |
| Hurenkamp<br>GJ 2000<br>(51) | The<br>Netherlands | 3           | double-blind,<br>RCT | 7d triple                | 25              | 51 (21-81)                | 18/7              | 4-6 weeks | histological<br>examination,<br>culture                                                  | <sup>13</sup> C-UBT,<br>histological<br>examination,<br>culture | metronidazole  | 400 mg bid     | 7d         |    |
|                              |                    |             |                      |                          |                 |                           |                   |           |                                                                                          |                                                                 | clarithromycin | 250 mg bid     | 7d         |    |
|                              |                    |             |                      |                          |                 |                           |                   |           |                                                                                          |                                                                 |                | omeprazole     | 20 mg bid  | 7d |
|                              |                    |             |                      | 10d triple               | 24              | 52 (28-77)                | 14/10             | 4-6 weeks | histological<br>examination,<br>culture                                                  | <sup>13</sup> C-UBT,<br>histological<br>examination,<br>culture | metronidazole  | 400 mg bid     | 10d        |    |
|                              |                    |             |                      |                          |                 |                           |                   |           | clarithromycin                                                                           | 250 mg bid                                                      | 10d            |                |            |    |
|                              |                    |             |                      |                          |                 |                           |                   |           |                                                                                          | omeprazole                                                      | 20 mg bid      | 10d            |            |    |
| Iacopini F<br>2005 (52)      | Italy              | 3           | RCT,<br>open-label   | 7d<br>levofloxacin       | 83              | 53±15                     | 21/61             | 8 weeks   | histopathological<br>examination,<br><sup>13</sup> C-UBT                                 | <sup>13</sup> C-UBT, H<br>pylori stool<br>antigens              | esomeprazole   | 20 mg qd       | 7d         |    |
|                              |                    |             |                      |                          |                 |                           |                   |           |                                                                                          |                                                                 | levofloxacin   | 500mg qd       | 7d         |    |
|                              |                    |             |                      |                          |                 |                           |                   |           |                                                                                          |                                                                 |                | azithromycin   | 500 mg qd  | 7d |
|                              |                    |             |                      | 7d triple                | 81              | 56±15                     | 21/60             | 8 weeks   | histopathological<br>examination,<br><sup>13</sup> C-UBT                                 | <sup>13</sup> C-UBT, H<br>pylori stool<br>antigens              | esomeprazole   | 20 mg bid      | 7d         |    |
|                              |                    |             |                      |                          |                 |                           |                   |           | clarithromycin                                                                           | 500 mg bid                                                      | 7d             |                |            |    |
|                              |                    |             |                      |                          |                 |                           |                   |           | amoxicillin                                                                              | 1000 mg bid                                                     | 7d             |                |            |    |
| Jang HJ<br>2005 (53)         | South Korea        | 2           | RCT                  | 7d triple                | 75              | 49.6±12.4                 | 52/23             | 4-6 weeks | histological<br>examination,<br>culture, rapid<br>urease testing,<br><sup>13</sup> C-UBT | <sup>13</sup> C-UBT                                             | PPI            | bid            | 7d         |    |
|                              |                    |             |                      |                          |                 |                           |                   |           |                                                                                          |                                                                 | amoxicillin    | 1000 mg bid    | 7d         |    |
|                              |                    |             |                      |                          |                 |                           |                   |           |                                                                                          |                                                                 |                | clarithromycin | 500 mg bid | 7d |

| Authors                 | Country | Jadad score | Study design                   | Patients' characteristic |                 |                               |                   |           |                                                                              | Treatment                                      |                |               |            |    |
|-------------------------|---------|-------------|--------------------------------|--------------------------|-----------------|-------------------------------|-------------------|-----------|------------------------------------------------------------------------------|------------------------------------------------|----------------|---------------|------------|----|
|                         |         |             |                                | Treatment                | No. of patients | Age(range) or $\pm$ (SD) year | Man/Women (n1/n2) | Follow-up | Confirmation of <i>H. pylori</i> infection                                   | Confirmation of Eradication                    | Intervention   | Dosage        | Duration   |    |
| Javid G 2013 (54)       | India   | 3           | single-center, RCT, open-label | 7d bismuth               | 74              | 50.0 $\pm$ 13.4               | 46/28             | 4-6 weeks | histological examination, culture, rapid urease testing, <sup>13</sup> C-UBT | <sup>13</sup> C-UBT                            | PPI            | bid           | 7d         |    |
|                         |         |             |                                |                          |                 |                               |                   |           |                                                                              |                                                | bismuth        | 300 mg qid    | 7d         |    |
|                         |         |             |                                |                          |                 |                               |                   |           |                                                                              |                                                |                | metronidazole | 500 mg tid | 7d |
|                         |         |             |                                |                          |                 |                               |                   |           |                                                                              |                                                |                | tetracycline  | 500 mg qid | 7d |
|                         |         |             |                                | 10d triple               | 134             | 37.80 $\pm$ 12.30             | 80/54             | 4 weeks   | rapid urease test, histological examination                                  | rapid urease test, histological examination    | pantoprazole   | 40 mg bid     | 10d        |    |
|                         |         |             |                                | 10d sequential           | 138             | 38.40 $\pm$ 12.60             | 87/51             | 4 weeks   | rapid urease test, histological examination                                  | rapid urease test, histological examination    | clarithromycin | 500 mg bid    | 10d        |    |
| Jiang YA 2013 (55)      | China   | 1           | RCT                            | 7d                       | 40              | 44.4                          | 28/12             | 4 weeks   | rapid urease test, histological examination                                  | <sup>13</sup> C-UBT                            | lansoprazole   | 30 mg bid     | 7d         |    |
|                         |         |             |                                | levofloxacin             |                 |                               |                   |           |                                                                              |                                                | amoxicillin    | 1000 mg bid   | 7d         |    |
|                         |         |             |                                |                          |                 |                               |                   |           |                                                                              |                                                | levofloxacin   | 500 mg qd     | 7d         |    |
|                         |         |             |                                | 7d bismuth               | 40              | 42.8                          | 34/6              | 4 weeks   | rapid urease test, histological examination                                  | <sup>13</sup> C-UBT                            | lansoprazole   | 30 mg bid     | 7d         |    |
|                         |         |             |                                |                          |                 |                               |                   |           |                                                                              |                                                | amoxicillin    | 1000 mg bid   | 7d         |    |
|                         |         |             |                                |                          |                 |                               |                   |           |                                                                              |                                                | levofloxacin   | 500 mg qd     | 7d         |    |
| Karatapanis S 2011 (56) | Greece  | 3           | open-label, RCT, multi-center  | 7d triple                | 102             | 47 (20-72)                    | 55/47             | 4-6 weeks | rapid urease testing, histological examination                               | rapid urease testing, histological examination | rabeprazole    | 20 mg bid     | 7d         |    |
|                         |         |             |                                |                          |                 |                               |                   |           |                                                                              |                                                | clarithromycin | 500 mg bid    | 7d         |    |
|                         |         |             |                                |                          |                 |                               |                   |           |                                                                              |                                                | amoxicillin    | 1000 mg bid   | 7d         |    |
|                         |         |             |                                | 10d triple               | 103             | 48 (22-77)                    | 60/43             | 4-6 weeks | rapid urease                                                                 | rapid urease                                   | rabeprazole    | 20 mg bid     | 10d        |    |

| Authors                | Country                   | Jadad score | Study design      | Patients' characteristic |                                                            |                               |                   |                                      |                                                            | Treatment                                      |                    |             |          |
|------------------------|---------------------------|-------------|-------------------|--------------------------|------------------------------------------------------------|-------------------------------|-------------------|--------------------------------------|------------------------------------------------------------|------------------------------------------------|--------------------|-------------|----------|
|                        |                           |             |                   | Treatment                | No. of patients                                            | Age(range) or $\pm$ (SD) year | Man/Women (n1/n2) | Follow-up                            | Confirmation of <i>H. pylori</i> infection                 | Confirmation of Eradication                    | Intervention       | Dosage      | Duration |
| Katelaris PH 2002 (57) | Australia and New Zealand | 3           | multi-center, RCT | 14d triple               | 102                                                        | 47 (24-73)                    | 58/44             | 4-6 weeks                            | testing, histological examination                          | testing, histological examination              | clarithromycin     | 500 mg bid  | 10d      |
|                        |                           |             |                   |                          |                                                            |                               |                   |                                      | rapid urease testing, histological examination             | rapid urease testing, histological examination | amoxicillin        | 1000 mg bid | 10d      |
|                        |                           |             |                   |                          |                                                            |                               |                   |                                      | rapid urease testing, histological examination             | rapid urease testing, histological examination | rabeprazole        | 20 mg bid   | 14d      |
|                        |                           |             |                   | 7d bismuth               | 134                                                        | 50 $\pm$ 14                   | 69/65             | 8 weeks                              | urease test, histological examination, <sup>13</sup> C-UBT | <sup>13</sup> C-UBT                            | pantoprazole       | 40 mg bid   | 7d       |
|                        |                           |             |                   |                          |                                                            |                               |                   |                                      | urease test, histological examination, <sup>13</sup> C-UBT | <sup>13</sup> C-UBT                            | bismuth subcitrate | 108 mg qid  | 7d       |
|                        |                           |             |                   |                          |                                                            |                               |                   |                                      | urease test, histological examination, <sup>13</sup> C-UBT | <sup>13</sup> C-UBT                            | tetracycline       | 500 mg qid  | 7d       |
| 7d triple              | 134                       | 51 $\pm$ 14 | 58/76             | 8 weeks                  | urease test, histological examination, <sup>13</sup> C-UBT | <sup>13</sup> C-UBT           | metronidazole     | 200 mg tid daytime + 400 mg at night | 7d                                                         |                                                |                    |             |          |
|                        |                           |             |                   |                          | urease test, histological examination, <sup>13</sup> C-UBT | <sup>13</sup> C-UBT           | pantoprazole      | 40 mg bid                            | 7d                                                         |                                                |                    |             |          |
|                        |                           |             |                   |                          | urease test, histological examination, <sup>13</sup> C-UBT | <sup>13</sup> C-UBT           | amoxicillin       | 1000 mg bid                          | 7d                                                         |                                                |                    |             |          |
| Keum B 2005 (58)       | South Korea               | 1           | quasi-RCT         | 7d triple                | 42                                                         |                               |                   | 4 weeks                              | endoscopy, UBT                                             | rapid urease test, UBT                         | omeprazole         | 20 mg bid   | 7d       |
|                        |                           |             |                   |                          |                                                            |                               |                   |                                      | endoscopy, UBT                                             | rapid urease test, UBT                         | amoxicillin        | 1000 mg bid | 7d       |
|                        |                           |             |                   | 14d triple               | 52                                                         | 47.7 $\pm$ 11.8               | 55/39             | 4 weeks                              | endoscopy, UBT                                             | rapid urease test, UBT                         | clarithromycin     | 500 mg bid  | 7d       |
|                        |                           |             |                   |                          |                                                            |                               |                   |                                      | endoscopy, UBT                                             | rapid urease test, UBT                         | omeprazole         | 20 mg bid   | 14d      |
|                        |                           |             |                   | 7d triple                | 45                                                         | 41.9 $\pm$ 11.3               | 49/28             | 4 weeks                              | endoscopy, UBT                                             | rapid urease                                   | amoxicillin        | 1000 mg bid | 14d      |
|                        |                           |             |                   |                          | endoscopy, UBT                                             | rapid urease                  | clarithromycin    | 500 mg bid                           | 14d                                                        |                                                |                    |             |          |
|                        |                           |             |                   |                          |                                                            |                               |                   | endoscopy, UBT                       | rapid urease                                               | rabeprazole                                    | 10 mg bid          | 7d          |          |

| Authors            | Country | Jadad score | Study design       | Patients' characteristic |                 |                               |                   |                        |                                             | Treatment                   |                 |             |          |
|--------------------|---------|-------------|--------------------|--------------------------|-----------------|-------------------------------|-------------------|------------------------|---------------------------------------------|-----------------------------|-----------------|-------------|----------|
|                    |         |             |                    | Treatment                | No. of patients | Age(range) or $\pm$ (SD) year | Man/Women (n1/n2) | Follow-up              | Confirmation of <i>H. pylori</i> infection  | Confirmation of Eradication | Intervention    | Dosage      | Duration |
|                    |         |             |                    | 14d triple               | 32              | 45.7 $\pm$ 12.2               | 63/35             | 4 weeks                | endoscopy, UBT                              | rapid urease test, UBT      | amoxicillin     | 1000 mg bid | 7d       |
|                    |         |             |                    |                          |                 |                               |                   |                        |                                             |                             | clarithromycin  | 500 mg bid  | 7d       |
|                    |         |             |                    |                          |                 |                               |                   |                        |                                             |                             | esomeprazole    | 10 mg bid   | 14d      |
|                    |         |             |                    |                          |                 |                               |                   |                        |                                             |                             | amoxicillin     | 1000 mg bid | 14d      |
|                    |         |             |                    |                          |                 |                               |                   |                        |                                             |                             | clarithromycin  | 500 mg bid  | 14d      |
|                    |         |             |                    |                          |                 |                               |                   |                        |                                             |                             | clarithromycin  | 500 mg bid  | 14d      |
|                    |         |             |                    | 7d triple                | 14              | 4 weeks                       | endoscopy, UBT    | rapid urease test, UBT | esomeprazole                                | 20 mg bid                   | 7d              |             |          |
|                    |         |             |                    |                          |                 |                               |                   |                        | amoxicillin                                 | 1000 mg bid                 | 7d              |             |          |
|                    |         |             |                    |                          |                 |                               |                   |                        | clarithromycin                              | 500 mg bid                  | 7d              |             |          |
|                    |         |             |                    | 14d triple               | 84              | 4 weeks                       | endoscopy, UBT    | rapid urease test, UBT | esomeprazole                                | 20 mg bid                   | 14d             |             |          |
|                    |         |             |                    |                          |                 |                               |                   |                        | amoxicillin                                 | 1000 mg bid                 | 14d             |             |          |
|                    |         |             |                    |                          |                 |                               |                   |                        | clarithromycin                              | 500 mg bid                  | 14d             |             |          |
| 7d triple          | 40      | 4 weeks     | endoscopy, UBT     | rapid urease test, UBT   | esomeprazole    | 30 mg bid                     | 7d                |                        |                                             |                             |                 |             |          |
|                    |         |             |                    |                          | amoxicillin     | 1000 mg bid                   | 7d                |                        |                                             |                             |                 |             |          |
|                    |         |             |                    |                          | clarithromycin  | 500 mg bid                    | 7d                |                        |                                             |                             |                 |             |          |
| 14d triple         | 43      | 4 weeks     | endoscopy, UBT     | rapid urease test, UBT   | esomeprazole    | 30 mg bid                     | 14d               |                        |                                             |                             |                 |             |          |
|                    |         |             |                    |                          | amoxicillin     | 1000 mg bid                   | 14d               |                        |                                             |                             |                 |             |          |
|                    |         |             |                    |                          | clarithromycin  | 500 mg bid                    | 14d               |                        |                                             |                             |                 |             |          |
| Kiliç ZM 2008 (59) | Turkey  | 1           | RCT, single-center | 14d                      | 30              | NA                            | 19/11             | 8 weeks                | histological examination, rapid urease test | <sup>13</sup> C-UBT         | ranitidine      | 400 mg bid  | 14d      |
|                    |         |             |                    |                          |                 |                               |                   |                        |                                             |                             | bismuth citrate |             |          |
|                    |         |             |                    |                          |                 |                               |                   |                        |                                             |                             | amoxicillin     | 1000 mg bid | 14d      |
|                    |         |             |                    |                          |                 |                               |                   |                        |                                             |                             | clarithromycin  | 500 mg bid  | 14d      |
|                    |         |             |                    | 14d triple               | 30              |                               | 15/15             | 8 weeks                | histological                                | <sup>13</sup> C-UBT         | esomeprazole    | 40 mg bid   | 14d      |

| Authors             | Country     | Jadad score | Study design         | Patients' characteristic |                 |                           |                   |                |                                                                                                  | Treatment                   |                                                                                                                                                                       |             |          |
|---------------------|-------------|-------------|----------------------|--------------------------|-----------------|---------------------------|-------------------|----------------|--------------------------------------------------------------------------------------------------|-----------------------------|-----------------------------------------------------------------------------------------------------------------------------------------------------------------------|-------------|----------|
|                     |             |             |                      | Treatment                | No. of patients | Age(range) or ± (SD) year | Man/Women (n1/n2) | Follow-up      | Confirmation of <i>H. pylori</i> infection                                                       | Confirmation of Eradication | Intervention                                                                                                                                                          | Dosage      | Duration |
| Kim BG<br>2007 (60) | South Korea | 2           | RCT,<br>open-labeled | 7d triple                | 337             | 49.3(18-78)               | 206/131           | 5 weeks        | examination, rapid urease test, rapid urease test, <sup>13</sup> C-UBT, histological examination | <sup>13</sup> C-UBT         | amoxicillin                                                                                                                                                           | 1000 mg bid | 14d      |
|                     |             |             |                      |                          |                 |                           |                   |                |                                                                                                  |                             | clarithromycin                                                                                                                                                        | 500 mg bid  | 14d      |
|                     |             |             |                      | 14d triple               | 261             | 48.4(18-84)               | 179/82            | 5 weeks        | rapid urease test, <sup>13</sup> C-UBT, histological examination                                 | <sup>13</sup> C-UBT         | omeprazole/equi valent dose of other PPIs                                                                                                                             | 20 mg bid   | 7d       |
|                     |             |             |                      |                          |                 |                           |                   |                |                                                                                                  |                             | amoxicillin                                                                                                                                                           | 1000 mg bid | 7d       |
|                     |             |             |                      |                          |                 |                           |                   | clarithromycin | 500 mg bid                                                                                       | 7d                          |                                                                                                                                                                       |             |          |
| Kim MN<br>2008 (61) | South Korea | 1           | RCT,<br>open-labeled | 7d probiotic             | 168             | 48.1±12.4                 | 71/97             | 4 weeks        | histological examination, rapid urease test, <sup>13</sup> C-UBT                                 | <sup>13</sup> C-UBT         | PPI                                                                                                                                                                   | bid         | 7d       |
|                     |             |             |                      |                          |                 |                           |                   |                |                                                                                                  |                             | clarithromycin                                                                                                                                                        | 500 mg bid  | 7d       |
|                     |             |             |                      |                          |                 |                           |                   |                |                                                                                                  |                             | amoxicillin                                                                                                                                                           | 1000 mg bid | 7d       |
|                     |             |             |                      |                          |                 |                           |                   |                |                                                                                                  |                             | Will yogurt (Lactobacillus acidophilus HY 2177 (> 10 <sup>5</sup> colony-forming units /mL), Lactobacillus casei HY 2743(> 10 <sup>5</sup> colony-forming units /mL), | 150 ml qd   | 3 weeks  |



| Authors          | Country     | Jadad score | Study design      | Patients' characteristic |                 |                           |                   |           |                                                                      | Treatment                   |                                               |                                                                                                                                                               |                       |
|------------------|-------------|-------------|-------------------|--------------------------|-----------------|---------------------------|-------------------|-----------|----------------------------------------------------------------------|-----------------------------|-----------------------------------------------|---------------------------------------------------------------------------------------------------------------------------------------------------------------|-----------------------|
|                  |             |             |                   | Treatment                | No. of patients | Age(range) or ± (SD) year | Man/Women (n1/n2) | Follow-up | Confirmation of <i>H. pylori</i> infection                           | Confirmation of Eradication | Intervention                                  | Dosage                                                                                                                                                        | Duration              |
|                  |             |             |                   |                          |                 |                           |                   |           |                                                                      |                             |                                               | Bifidobacterium longum HY8001 (> 10 <sup>6</sup> colony-forming units /mL), and Streptococcus thermophilus B-1 (> 10 <sup>8</sup> colony-forming units /mL)). |                       |
|                  |             |             |                   | 7d triple                | 179             | 53.7±12.0                 | 89/88             | 4 weeks   | histological examination, the rapid urease test, <sup>13</sup> C-UBT | <sup>13</sup> C-UBT         | PPI<br>clarithromycin<br>amoxicillin          | bid<br>500 mg bid<br>1000 mg bid                                                                                                                              | 7d<br>7d<br>7d        |
| Kim N 2008 (62)  | South Korea | 5           | double-blind, RCT | 7d triple                | 117             | 47.3±11.8                 | 89/28             | 6 weeks   | <sup>13</sup> C-UBT, modified giemsa staining, rapid urease test     | <sup>13</sup> C-UBT         | lansoprazole<br>clarithromycin<br>amoxicillin | 30 mg bid<br>500 mg bid<br>1000 mg bid                                                                                                                        | 7d<br>7d<br>7d        |
|                  |             |             |                   | 14d triple               | 112             | 48.0±10.7                 | 77/35             | 6 weeks   | <sup>13</sup> C-UBT, modified giemsa staining, rapid urease test     | <sup>13</sup> C-UBT         | lansoprazole<br>clarithromycin<br>amoxicillin | 30 mg bid<br>500 mg bid<br>1000 mg bid                                                                                                                        | 14d<br>14d<br>14d     |
| Kim YS 2011 (63) | South Korea | 3           | RCT, single-blind | 10d sequential           | 205             | 51.8±12.5                 | 112/93            | 4 weeks   | histological examination, rapid urease test, <sup>13</sup> C-UBT     | <sup>13</sup> C-UBT         | pantoprazole<br>amoxicillin<br>pantoprazole   | 40 mg bid<br>1000 mg bid<br>40 mg bid                                                                                                                         | 1-5d<br>1-5d<br>6-10d |

| Authors             | Country       | Jadad score | Study design      | Patients' characteristic |                 |                               |                   |           |                                                                  | Treatment                                              |                |             |                |             |       |
|---------------------|---------------|-------------|-------------------|--------------------------|-----------------|-------------------------------|-------------------|-----------|------------------------------------------------------------------|--------------------------------------------------------|----------------|-------------|----------------|-------------|-------|
|                     |               |             |                   | Treatment                | No. of patients | Age(range) or $\pm$ (SD) year | Man/Women (n1/n2) | Follow-up | Confirmation of <i>H. pylori</i> infection                       | Confirmation of Eradication                            | Intervention   | Dosage      | Duration       |             |       |
|                     |               |             |                   | 14d triple               | 204             | 50.6 $\pm$ 13.7               | 100/104           | 4 weeks   | histological examination, rapid urease test, <sup>13</sup> C-UBT | <sup>13</sup> C-UBT                                    | clarithromycin | 500 mg bid  | 6-10d          |             |       |
|                     |               |             |                   |                          |                 |                               |                   |           |                                                                  |                                                        | metronidazole  | 500 mg bid  | 6-10d          |             |       |
|                     |               |             |                   |                          |                 |                               |                   |           |                                                                  |                                                        | pantoprazole   | 40 mg bid   | 14d            |             |       |
|                     |               |             |                   |                          |                 |                               |                   |           |                                                                  |                                                        | amoxicillin    | 1000 mg bid | 14d            |             |       |
|                     |               |             |                   | 14d triple               | 69              | 47.0(17-67)                   | 56/13             | 6 weeks   | histological examination, culture                                | histological examination, culture, <sup>13</sup> C-UBT | clarithromycin | 500 mg bid  | 14d            |             |       |
|                     |               |             |                   |                          |                 |                               |                   |           |                                                                  |                                                        | omeprazole     | 20 mg bid   | 14d            |             |       |
|                     |               |             |                   |                          |                 |                               |                   |           |                                                                  |                                                        | amoxicillin    | 1000 mg bid | 14d            |             |       |
|                     |               |             |                   |                          |                 |                               |                   |           |                                                                  |                                                        | clarithromycin | 400 mg bid  | 14d            |             |       |
| Kiyota K 1999 (64)  | Japan         | 2           | RCT, single-blind | 7d triple                | 78              | 48.2(17-70)                   | 60/18             | 6 weeks   | histological examination, culture                                | histological examination, culture, <sup>13</sup> C-UBT | omeprazole     | 20 mg bid   | 7d             |             |       |
|                     |               |             |                   |                          |                 |                               |                   |           |                                                                  |                                                        |                | amoxicillin | 1000 mg bid    | 7d          |       |
|                     |               |             |                   |                          |                 |                               |                   |           |                                                                  |                                                        |                |             | clarithromycin | 400 mg bid  | 7d    |
|                     |               |             |                   | 14d triple               | 69              | 47.0(17-67)                   | 56/13             | 6 weeks   | histological examination, culture                                | histological examination, culture, <sup>13</sup> C-UBT | omeprazole     | 20 mg bid   | 14d            |             |       |
| Lahbabi M 2013 (65) | Morocco       | 3           | RCT, single-blind | 7d triple                | 115             | 48.5 $\pm$ 14.8               | 52/63             | 3 months  | histological examination, polymerase chain reaction              | <sup>13</sup> C-UBT                                    | PPI            | 20 mg bid   | 7d             |             |       |
|                     |               |             |                   |                          |                 |                               |                   |           |                                                                  |                                                        |                | amoxicillin | 1000 mg bid    | 7d          |       |
|                     |               |             |                   |                          |                 |                               |                   |           |                                                                  |                                                        |                |             | clarithromycin | 500 mg bid  | 7d    |
|                     |               |             |                   | 10d sequential           | 104             | 47.5 $\pm$ 15                 | 57/47             | 3 months  | histological examination, polymerase chain reaction              | <sup>13</sup> C-UBT                                    | PPI            | 20 mg bid   | 1-5d           |             |       |
|                     |               |             |                   |                          |                 |                               |                   |           |                                                                  |                                                        |                |             | amoxicillin    | 1000 mg bid | 1-5d  |
|                     |               |             |                   |                          |                 |                               |                   |           |                                                                  |                                                        |                |             | PPI            | 20 mg bid   | 6-10d |
|                     |               |             |                   |                          |                 |                               |                   |           |                                                                  |                                                        | metronidazole  | 500 mg bid  | 6-10d          |             |       |
|                     |               |             |                   |                          |                 |                               |                   |           |                                                                  |                                                        | clarithromycin | 500 mg bid  | 6-10d          |             |       |
|                     |               |             |                   |                          |                 |                               |                   |           |                                                                  |                                                        | amoxicillin    | 1000 mg bid | 7d             |             |       |
| Laine L             | United States | 3           | RCT               | 7d triple                | 50              | 43 $\pm$ 2                    | 17/33             | 4 weeks   | <sup>13</sup> C-UBT, breath                                      | <sup>13</sup> C-UBT                                    | amoxicillin    | 1000 mg bid | 7d             |             |       |

| Authors              | Country       | Jadad score | Study design      | Patients' characteristic |                 |                               |                   |            |                                                        | Treatment                              |              |                |             |             |       |            |                                                                                               |                     |                |             |     |
|----------------------|---------------|-------------|-------------------|--------------------------|-----------------|-------------------------------|-------------------|------------|--------------------------------------------------------|----------------------------------------|--------------|----------------|-------------|-------------|-------|------------|-----------------------------------------------------------------------------------------------|---------------------|----------------|-------------|-----|
|                      |               |             |                   | Treatment                | No. of patients | Age(range) or $\pm$ (SD) year | Man/Women (n1/n2) | Follow-up  | Confirmation of <i>H. pylori</i> infection             | Confirmation of Eradication            | Intervention | Dosage         | Duration    |             |       |            |                                                                                               |                     |                |             |     |
| 1996 (66)            |               |             |                   |                          |                 |                               |                   |            |                                                        |                                        |              | clarithromycin | 500 mg bid  | 7d          |       |            |                                                                                               |                     |                |             |     |
|                      |               |             |                   |                          |                 |                               |                   |            |                                                        |                                        |              | 10d triple     | 50          | 40 $\pm$ 2  | 23/27 | 4 weeks    | <sup>13</sup> C-UBT, breath test, histological examination, serum <i>H. pylori</i> antibodies | <sup>13</sup> C-UBT | omeprazole     | 20 mg bid   | 7d  |
|                      |               |             |                   |                          |                 |                               |                   |            |                                                        |                                        |              |                |             |             |       |            |                                                                                               |                     | amoxicillin    | 1000 mg bid | 10d |
|                      |               |             |                   |                          |                 |                               |                   |            |                                                        |                                        |              | 14d triple     | 50          | 43 $\pm$ 2  | 24/26 | 4 weeks    | <sup>13</sup> C-UBT, breath test, histological examination, serum <i>H. pylori</i> antibodies | <sup>13</sup> C-UBT | clarithromycin | 500 mg bid  | 10d |
|                      |               |             |                   |                          |                 |                               |                   |            |                                                        |                                        |              |                |             |             |       |            |                                                                                               |                     | omeprazole     | 20 mg bid   | 10d |
|                      |               |             |                   |                          |                 |                               |                   |            |                                                        |                                        |              |                |             |             |       |            |                                                                                               |                     | amoxicillin    | 1000 mg bid | 14d |
| Laine L<br>2003 (67) | North America | 2           | RCT, multi-center | 10d bismuth              | 138             | 47 $\pm$ 13                   | 86/52             | 29-57 days | histological examination, <sup>13</sup> C-UBT, culture | <sup>13</sup> C-UBT                    |              | bismuth        | 140 mg qid  | 10d         |       |            |                                                                                               |                     |                |             |     |
|                      |               |             |                   |                          |                 |                               |                   |            |                                                        |                                        |              | biskalcitrate  |             |             |       |            |                                                                                               |                     |                |             |     |
|                      |               |             |                   |                          |                 |                               |                   |            |                                                        |                                        |              | metronidazole  | 125 mg qid  | 10d         |       |            |                                                                                               |                     |                |             |     |
|                      |               |             |                   |                          |                 |                               |                   |            |                                                        |                                        |              | tetracycline   | 125 mg qid  | 10d         |       |            |                                                                                               |                     |                |             |     |
|                      |               |             |                   |                          |                 |                               |                   |            |                                                        |                                        |              | omeprazole     | 20 mg bid   | 10d         |       |            |                                                                                               |                     |                |             |     |
|                      |               |             |                   |                          |                 |                               |                   |            |                                                        |                                        |              | 10d triple     | 137         | 47 $\pm$ 15 | 80/57 | 29-57 days | histological examination, <sup>13</sup> C-UBT, culture                                        | <sup>13</sup> C-UBT | omeprazole     | 20 mg bid   | 10d |
| amoxicillin          | 1000 mg bid   | 10d         |                   |                          |                 |                               |                   |            |                                                        |                                        |              |                |             |             |       |            |                                                                                               |                     |                |             |     |
| Liang Z<br>2010 (68) | China         | 2           | RCT               | 10d sequential           | 56              | 39.5 (18-75)                  | 56/50             | 4 weeks    | rapid urease test, <sup>14</sup> C-UBT                 | rapid urease test, <sup>14</sup> C-UBT |              | rabeprazole    | 20 mg bid   | 1-5d        |       |            |                                                                                               |                     |                |             |     |
|                      |               |             |                   |                          |                 |                               |                   |            |                                                        |                                        |              | amoxicillin    | 1000 mg bid | 1-5d        |       |            |                                                                                               |                     |                |             |     |
|                      |               |             |                   |                          |                 |                               |                   |            |                                                        |                                        |              | rabeprazole    | 20 mg bid   | 6-10d       |       |            |                                                                                               |                     |                |             |     |
|                      |               |             |                   |                          |                 |                               |                   |            |                                                        |                                        |              | clarithromycin | 500 mg bid  | 6-10d       |       |            |                                                                                               |                     |                |             |     |

| Authors           | Country     | Jadad score | Study design                  | Patients' characteristic |                 |                               |                   |           |                                                      | Treatment                              |                   |             |          |
|-------------------|-------------|-------------|-------------------------------|--------------------------|-----------------|-------------------------------|-------------------|-----------|------------------------------------------------------|----------------------------------------|-------------------|-------------|----------|
|                   |             |             |                               | Treatment                | No. of patients | Age(range) or $\pm$ (SD) year | Man/Women (n1/n2) | Follow-up | Confirmation of <i>H. pylori</i> infection           | Confirmation of Eradication            | Intervention      | Dosage      | Duration |
|                   |             |             |                               | 10d triple               | 50              |                               |                   | 4 weeks   | rapid urease test, <sup>14</sup> C-UBT               | rapid urease test, <sup>14</sup> C-UBT | ornidazole        | 500 mg bid  | 6-10d    |
|                   |             |             |                               |                          |                 |                               |                   |           |                                                      |                                        | rabeprazole       | 20 mg bid   | 10d      |
|                   |             |             |                               |                          |                 |                               |                   |           |                                                      |                                        | amoxicillin       | 1000 mg bid | 10d      |
|                   |             |             |                               |                          |                 |                               |                   |           |                                                      |                                        | clarithromycin    | 500 mg bid  | 10d      |
| Liao J 2013 (69)  | China       | 3           | RCT, open-label               | 14d levofloxacin         | 81              | 48.9 (23-75)                  | 46/35             | 6 weeks   | rapid urease test, histological examination, culture | <sup>13</sup> C-UBT                    | lansoprazole      | 30 mg bid   | 14d      |
|                   |             |             |                               |                          |                 |                               |                   |           |                                                      |                                        | amoxicillin       | 1000 mg bid | 14d      |
|                   |             |             |                               | 14d bismuth              | 80              | 46.7 (23-78)                  | 43/37             | 6 weeks   | rapid urease test, histological examination, culture | <sup>13</sup> C-UBT                    | lansoprazole      | 30 mg bid   | 14d      |
|                   |             |             |                               |                          |                 |                               |                   |           |                                                      |                                        | bismuth           | 220 mg bid  | 14d      |
|                   |             |             |                               |                          |                 |                               |                   |           |                                                      |                                        | potassium citrate |             |          |
|                   |             |             |                               |                          |                 |                               |                   |           |                                                      |                                        | amoxicillin       | 1000 mg bid | 14d      |
|                   |             |             |                               |                          |                 |                               |                   |           |                                                      |                                        | levofloxacin      | 500 mg qd   | 14d      |
| Lim JH 2013 (70)  | South Korea | 3           | RCT, open-label, double-arm   | 14d sequential           | 86              | 57.5 $\pm$ 11.8               | 43/43             | 4 weeks   | histological examination, rapid urease test          | <sup>13</sup> C-UBT                    | rabeprazole       | 20 mg bid   | 1-7d     |
|                   |             |             |                               |                          |                 |                               |                   |           |                                                      |                                        | amoxicillin       | 1000 mg bid | 1-7d     |
|                   |             |             |                               | 14d concomitant          | 78              | 56.0 $\pm$ 12.1               | 45/33             | 4 weeks   | histological examination, rapid urease test          | <sup>13</sup> C-UBT                    | rabeprazole       | 20 mg bid   | 8-14d    |
|                   |             |             |                               |                          |                 |                               |                   |           |                                                      |                                        | clarithromycin    | 500 mg bid  | 8-14d    |
|                   |             |             |                               |                          |                 |                               |                   |           |                                                      |                                        | metronidazole     | 500 mg bid  | 8-14d    |
|                   |             |             |                               |                          |                 |                               |                   |           |                                                      |                                        | rabeprazole       | 20 mg bid   | 14d      |
|                   |             |             |                               |                          |                 |                               |                   |           |                                                      |                                        | amoxicillin       | 1000 mg bid | 14d      |
|                   |             |             |                               |                          |                 |                               |                   |           |                                                      |                                        | clarithromycin    | 500 mg bid  | 14d      |
|                   |             |             |                               |                          |                 |                               |                   |           |                                                      |                                        | metronidazole     | 500 mg bid  | 14d      |
| Liou JM 2013 (71) | Taiwan      | 3           | multi-center, RCT, open-label | 10d sequential           | 300             | 52.8 $\pm$ 13.8               | 159/141           | 6 weeks   | rapid urease test, histological examination,         | <sup>13</sup> C-UBT                    | lansoprazole      | 30 mg bid   | 1-5d     |
|                   |             |             |                               |                          |                 |                               |                   |           |                                                      |                                        | amoxicillin       | 1000 mg bid | 1-5d     |
|                   |             |             |                               |                          |                 |                               |                   |           |                                                      |                                        | lansoprazole      | 30 mg bid   | 6-10d    |

| Authors        | Country    | Jadad score | Study design | Patients' characteristic |                                                      |                           |                   |             |                                            | Treatment                   |                |            |           |         |         |                                                                                     |                     |                |             |       |
|----------------|------------|-------------|--------------|--------------------------|------------------------------------------------------|---------------------------|-------------------|-------------|--------------------------------------------|-----------------------------|----------------|------------|-----------|---------|---------|-------------------------------------------------------------------------------------|---------------------|----------------|-------------|-------|
|                |            |             |              | Treatment                | No. of patients                                      | Age(range) or ± (SD) year | Man/Women (n1/n2) | Follow-up   | Confirmation of <i>H. pylori</i> infection | Confirmation of Eradication | Intervention   | Dosage     | Duration  |         |         |                                                                                     |                     |                |             |       |
|                |            |             |              |                          |                                                      |                           |                   |             | culture, serology, <sup>13</sup> C-UBT     |                             | clarithromycin | 500 mg bid | 6-10d     |         |         |                                                                                     |                     |                |             |       |
|                |            |             |              |                          |                                                      |                           |                   |             |                                            |                             | 14d sequential | 300        | 53.7±12.5 | 165/135 | 6 weeks | rapid urease test, histological examination, culture, serology, <sup>13</sup> C-UBT | <sup>13</sup> C-UBT | metronidazole  | 500 mg bid  | 6-10d |
|                |            |             |              |                          |                                                      |                           |                   |             |                                            |                             |                |            |           |         |         |                                                                                     |                     | lansoprazole   | 30 mg bid   | 1-7d  |
|                |            |             |              |                          |                                                      |                           |                   |             |                                            |                             | 14d triple     | 300        | 53.3±14.1 | 167/133 | 6 weeks | rapid urease test, histological examination, culture, serology, <sup>13</sup> C-UBT | <sup>13</sup> C-UBT | amoxicillin    | 1000 mg bid | 1-7d  |
|                |            |             |              |                          |                                                      |                           |                   |             |                                            |                             |                |            |           |         |         |                                                                                     |                     | lansoprazole   | 30 mg bid   | 8-14d |
|                |            |             |              |                          |                                                      |                           |                   |             |                                            |                             |                |            |           |         |         |                                                                                     |                     | clarithromycin | 500 mg bid  | 8-14d |
| metronidazole  | 500 mg bid | 8-14d       |              |                          |                                                      |                           |                   |             |                                            |                             |                |            |           |         |         |                                                                                     |                     |                |             |       |
| 7d             | 217        | 49.5±13.2   | 94/123       | 6 weeks                  | rapid urease test, histological examination, culture | <sup>13</sup> C-UBT       | lansoprazole      | 30 mg bid   | 14d                                        |                             |                |            |           |         |         |                                                                                     |                     |                |             |       |
|                |            |             |              |                          |                                                      |                           | amoxicillin       | 1000 mg bid | 14d                                        |                             |                |            |           |         |         |                                                                                     |                     |                |             |       |
|                |            |             |              |                          |                                                      |                           | clarithromycin    | 500 mg bid  | 14d                                        |                             |                |            |           |         |         |                                                                                     |                     |                |             |       |
|                |            |             |              |                          |                                                      |                           | levofloxacin      |             |                                            |                             |                |            |           |         |         |                                                                                     |                     |                |             |       |
| 7d triple      | 215        | 51.4±24     | 91/124       | 6 weeks                  | rapid urease test, histological examination, culture | <sup>13</sup> C-UBT       | clarithromycin    | 500 mg bid  | 7d                                         |                             |                |            |           |         |         |                                                                                     |                     |                |             |       |
|                |            |             |              |                          |                                                      |                           | amoxicillin       | 1000 mg bid | 7d                                         |                             |                |            |           |         |         |                                                                                     |                     |                |             |       |
|                |            |             |              |                          |                                                      |                           | lansoprazole      | 30 mg bid   | 7d                                         |                             |                |            |           |         |         |                                                                                     |                     |                |             |       |
|                |            |             |              |                          |                                                      |                           |                   |             |                                            |                             |                |            |           |         |         |                                                                                     |                     |                |             |       |
| 10d sequential | 179        | 56.4±13.7   | 75/104       | 8 weeks                  | rapid urease test, histological examination          | <sup>13</sup> C-UBT       | esomeprazole      | 20 mg bid   | 1-5d                                       |                             |                |            |           |         |         |                                                                                     |                     |                |             |       |
|                |            |             |              |                          |                                                      |                           | amoxicillin       | 1000 mg bid | 1-5d                                       |                             |                |            |           |         |         |                                                                                     |                     |                |             |       |
|                |            |             |              |                          |                                                      |                           | esomeprazole      | 20 mg bid   | 6-10d                                      |                             |                |            |           |         |         |                                                                                     |                     |                |             |       |
|                |            |             |              |                          |                                                      |                           | clarithromycin    | 500 mg bid  | 6-10d                                      |                             |                |            |           |         |         |                                                                                     |                     |                |             |       |

| Authors           | Country      | Jadad score | Study design                                    | Patients' characteristic |                 |                               |                   |           |                                                                   | Treatment                                                         |                    |             |          |
|-------------------|--------------|-------------|-------------------------------------------------|--------------------------|-----------------|-------------------------------|-------------------|-----------|-------------------------------------------------------------------|-------------------------------------------------------------------|--------------------|-------------|----------|
|                   |              |             |                                                 | Treatment                | No. of patients | Age(range) or $\pm$ (SD) year | Man/Women (n1/n2) | Follow-up | Confirmation of <i>H. pylori</i> infection                        | Confirmation of Eradication                                       | Intervention       | Dosage      | Duration |
|                   |              |             |                                                 |                          |                 |                               |                   |           |                                                                   |                                                                   | metronidazole      | 400 mg bid  | 6-10d    |
|                   |              |             |                                                 | 10d bismuth              | 178             | 56.4 $\pm$ 13.9               | 80/98             | 8 weeks   | rapid urease test, histological examination                       | <sup>13</sup> C-UBT                                               | esomeprazole       | 20 mg bid   | 10d      |
|                   |              |             |                                                 |                          |                 |                               |                   |           |                                                                   |                                                                   | bismuth subcitrate | 120 mg qid  | 10d      |
|                   |              |             |                                                 |                          |                 |                               |                   |           |                                                                   |                                                                   | tetracycline       | 500 mg qid  | 10d      |
|                   |              |             |                                                 |                          |                 |                               |                   |           |                                                                   |                                                                   | metronidazole      | 400 mg qid  | 10d      |
| Louw JA 1998 (74) | South Africa | 3           | single-blind, multi-center, parallel group, RCT | 7d triple                | 33              |                               |                   | 4 weeks   | urease reaction, histological examination, culture, body biopsies | urease reaction, histological examination, culture, body biopsies | pantoprazole       | 40 mg bid   | 7d       |
|                   |              |             |                                                 | 14d triple               | 34              | 42 (20-71)                    | 54/23             | 4 weeks   | urease reaction, histological examination, culture, body biopsies | urease reaction, histological examination, culture, body biopsies | amoxicillin        | 1000 mg bid | 7d       |
|                   |              |             |                                                 |                          |                 |                               |                   |           |                                                                   |                                                                   | clarithromycin     | 500 mg bid  | 7d       |
|                   |              |             |                                                 |                          |                 |                               |                   |           |                                                                   |                                                                   | pantoprazole       | 40 mg bid   | 14d      |
|                   |              |             |                                                 |                          |                 |                               |                   |           |                                                                   |                                                                   | amoxicillin        | 1000 mg bid | 14d      |
|                   |              |             |                                                 |                          |                 |                               |                   |           |                                                                   |                                                                   | clarithromycin     | 500 mg bid  | 14d      |
| Louw JA 1998 (75) | South Africa | 2           | single-blind, RCT                               | 7d triple                | 32              | 43 $\pm$ 14                   | 19/13             | 28 days   | urease reaction, histological assessment                          | urease reaction, histological assessment                          | lansoprazole       | 30 mg om    | 7d       |
|                   |              |             |                                                 | 14d triple               | 30              | 41 $\pm$ 12                   | 21/9              | 28 days   | urease reaction, histological assessment                          | urease reaction, histological assessment                          | amoxicillin        | 1000 mg bid | 7d       |
|                   |              |             |                                                 |                          |                 |                               |                   |           |                                                                   |                                                                   | clarithromycin     | 500 mg bid  | 7d       |
|                   |              |             |                                                 |                          |                 |                               |                   |           |                                                                   |                                                                   | lansoprazole       | 30 mg om    | 14d      |
|                   |              |             |                                                 |                          |                 |                               |                   |           |                                                                   |                                                                   | amoxicillin        | 1000 mg bid | 14d      |
|                   |              |             |                                                 |                          |                 |                               |                   |           |                                                                   |                                                                   | clarithromycin     | 500 mg bid  | 14d      |
| Ma CX 2008 (76)   | China        | 3           | RCT                                             | 10d sequential           | 67              | 35.6 $\pm$ 3.4                | 25/42             | 4 weeks   | rapid urease test, <sup>14</sup> C-UBT                            | rapid urease test, <sup>14</sup> C-UBT                            | omeprazole         | 20 mg bid   | 1-5d     |
|                   |              |             |                                                 |                          |                 |                               |                   |           |                                                                   |                                                                   | amoxicillin        | 1000 mg bid | 1-5d     |
|                   |              |             |                                                 |                          |                 |                               |                   |           |                                                                   |                                                                   | omeprazole         | 20 mg bid   | 6-10d    |

| Authors                   | Country                                                    | Jadad score | Study design                   | Patients' characteristic |                 |                           |                   |                |                                                                           | Treatment                              |                |                            |              |                              |             |       |
|---------------------------|------------------------------------------------------------|-------------|--------------------------------|--------------------------|-----------------|---------------------------|-------------------|----------------|---------------------------------------------------------------------------|----------------------------------------|----------------|----------------------------|--------------|------------------------------|-------------|-------|
|                           |                                                            |             |                                | Treatment                | No. of patients | Age(range) or ± (SD) year | Man/Women (n1/n2) | Follow-up      | Confirmation of <i>H. pylori</i> infection                                | Confirmation of Eradication            | Intervention   | Dosage                     | Duration     |                              |             |       |
| Maconi G 2001 (77)        | Italy                                                      | 2           | RCT, open-label, single-center |                          |                 |                           |                   |                |                                                                           |                                        |                | clarithromycin             | 500 mg bid   | 6-10d                        |             |       |
|                           |                                                            |             |                                |                          |                 |                           |                   |                |                                                                           |                                        |                |                            |              | tinidazole                   | 400 mg bid  | 6-10d |
|                           |                                                            |             |                                | 7d triple                | 63              | 36.1±4.5                  | 22/41             | 4 weeks        | rapid urease test, <sup>14</sup> C-UBT                                    | rapid urease test, <sup>14</sup> C-UBT | omeprazole     | 20 mg bid                  | 7d           |                              |             |       |
|                           |                                                            |             |                                |                          |                 |                           |                   |                |                                                                           |                                        |                |                            |              | clarithromycin               | 500 mg bid  | 7d    |
|                           |                                                            |             |                                |                          |                 |                           |                   |                |                                                                           |                                        |                |                            |              | amoxicillin                  | 1000 mg bid | 7d    |
|                           |                                                            |             |                                | 7d triple                | 65              | 47.05±11.09               | 37/28             | 1 month        | <sup>13</sup> C-UBT, histological examination                             | <sup>13</sup> C-UBT                    | lansoprazole   | 30 mg bid                  | 7d           |                              |             |       |
| Malfertheiner P 2011 (78) | France, Germany, Ireland, Italy, Poland, Spain, and the UK | 3           | open-label, RCT                | 14d triple               | 64              | 48.50±11.24               | 33/31             | 1 month        | <sup>13</sup> C-UBT, histological examination                             | <sup>13</sup> C-UBT                    | amoxycillin    | 1000 mg bid                | 7d           |                              |             |       |
|                           |                                                            |             |                                |                          |                 |                           |                   |                |                                                                           |                                        |                |                            | lansoprazole | 30 mg bid                    | 14d         |       |
|                           |                                                            |             |                                |                          |                 |                           |                   |                |                                                                           |                                        |                |                            |              | clarithromycin               | 500 mg bid  | 14d   |
|                           |                                                            |             |                                | 10d bismuth              | 216             | 48.53±14.64               | 113/103           | 28 and 56 days | histological examination, rapid urease test, culture, <sup>13</sup> C-UBT | <sup>13</sup> C-UBT                    | amoxycillin    | 1000 mg bid                | 14d          |                              |             |       |
|                           |                                                            |             |                                |                          |                 |                           |                   |                |                                                                           |                                        |                |                            |              | bismuth subcitrate potassium | 140 mg qid  | 10d   |
|                           |                                                            |             |                                |                          |                 |                           |                   |                |                                                                           |                                        |                |                            |              | metronidazole                | 125 mg qid  | 10d   |
| Mantzaris GJ 2002         | Greece                                                     | 2           | single-center, RCT             |                          |                 |                           |                   |                |                                                                           |                                        |                | tetracycline hydrochloride | 125 mg qid   | 10d                          |             |       |
|                           |                                                            |             |                                |                          |                 |                           |                   |                |                                                                           |                                        |                |                            |              | omeprazole                   | 20 mg qid   | 10d   |
|                           |                                                            |             |                                | 7d triple                | 222             | 47.95±14.52               | 122/100           | 28 and 56 days | histological examination, rapid urease test, culture, <sup>13</sup> C-UBT | <sup>13</sup> C-UBT                    | clarithromycin | 500 mg bid                 | 7d           |                              |             |       |
|                           |                                                            |             |                                |                          |                 |                           |                   |                |                                                                           |                                        |                |                            |              | amoxicillin                  | 1000 mg bid | 7d    |
|                           |                                                            |             |                                |                          |                 |                           |                   |                |                                                                           | omeprazole                             | 20 mg bid      | 7d                         |              |                              |             |       |
|                           |                                                            |             |                                |                          |                 |                           |                   |                |                                                                           |                                        | omeprazole     | 20 mg bid                  | 10d          |                              |             |       |
|                           |                                                            |             |                                |                          |                 |                           |                   |                |                                                                           |                                        | amoxicillin    | 1000 mg bid                | 10d          |                              |             |       |

| Authors                | Country | Jadad score | Study design      | Patients' characteristic |                 |                           |                   |             |                                                                                     | Treatment                                                         |                                                                |                                                                   |                                         |
|------------------------|---------|-------------|-------------------|--------------------------|-----------------|---------------------------|-------------------|-------------|-------------------------------------------------------------------------------------|-------------------------------------------------------------------|----------------------------------------------------------------|-------------------------------------------------------------------|-----------------------------------------|
|                        |         |             |                   | Treatment                | No. of patients | Age(range) or ± (SD) year | Man/Women (n1/n2) | Follow-up   | Confirmation of <i>H. pylori</i> infection                                          | Confirmation of Eradication                                       | Intervention                                                   | Dosage                                                            | Duration                                |
| (79)                   |         |             |                   |                          |                 |                           |                   |             | examination, immunohistochemistry                                                   | examination, immunohistochemistry                                 | clarithromycin                                                 | 500 mg bid                                                        | 10d                                     |
|                        |         |             |                   | 10d bismuth              | 71              | 40.5 (17-70)              | 35/36             | 10-12 weeks | rapid urease test, histological examination, immunohistochemistry                   | rapid urease test, histological examination, immunohistochemistry | omeprazole bismuth subcitrate                                  | 20 mg bid<br>120 mg qid                                           | 10d<br>10d                              |
|                        |         |             |                   |                          |                 |                           |                   |             |                                                                                     |                                                                   | metronidazole tetracycline hydrochloride                       | 500 mg tid<br>500 mg qid                                          | 10d<br>10d                              |
| Mao HV 2000 (80)       | Vietnam | 2           | RCT               | 10d triple               | 57              |                           |                   | 4 weeks     | rapid urease test, histological examination                                         | rapid urease test, histological examination                       | omeprazole clarithromycin amoxicillin                          | 20 mg bid<br>500 mg bid<br>1000 mg bid                            | 10d<br>10d<br>10d                       |
|                        |         |             |                   | 10d ranitidine bismuth   | 47              | 45 (17-75)                | NA                | 4 weeks     | rapid urease test, histological examination                                         | rapid urease test, histological examination                       | ranitidine bismuth citrate clarithromycin                      | 400 mg bid<br>500 mg bid                                          | 10d<br>10d                              |
|                        |         |             |                   |                          |                 |                           |                   |             |                                                                                     |                                                                   | amoxicillin                                                    | 1000 mg bid                                                       | 10d                                     |
| McNicholl AG 2013 (81) | Spain   | 3           | multi-center, RCT | 10d sequential           | 170             | 47.5±14.7                 | 70/100            | 4 weeks     | <sup>13</sup> C-UBT, histological examination, rapid urease test, bacterial culture | <sup>13</sup> C-UBT, histological examination                     | omeprazole amoxicillin omeprazole clarithromycin metronidazole | 20 mg/12h<br>1000 mg/12h<br>20 mg/12h<br>500 mg/12h<br>500 mg/12h | 1-5d<br>1-5d<br>6-10d<br>6-10d<br>6-10d |
|                        |         |             |                   | 10d concomitant          | 168             | 47.3±15.6                 | 63/105            | 4 weeks     | <sup>13</sup> C-UBT, histological examination, rapid urease test,                   | <sup>13</sup> C-UBT, histological examination                     | omeprazole amoxicillin clarithromycin                          | 20 mg/12h<br>1000 mg/12h<br>500 mg/12h                            | 10d<br>10d<br>10d                       |



| Authors                      | Country    | Jadad score | Study design                 | Patients' characteristic |                 |                           |                   |           |                                                                                              |                             | Treatment      |                   |          |
|------------------------------|------------|-------------|------------------------------|--------------------------|-----------------|---------------------------|-------------------|-----------|----------------------------------------------------------------------------------------------|-----------------------------|----------------|-------------------|----------|
|                              |            |             |                              | Treatment                | No. of patients | Age(range) or ± (SD) year | Man/Women (n1/n2) | Follow-up | Confirmation of <i>H. pylori</i> infection                                                   | Confirmation of Eradication | Intervention   | Dosage            | Duration |
| Mirbagheri SA 2006 (82)      | Iran       | 2           | RCT                          | 7d triple                | 110             | 41 (28-79)                | 57/53             | 6 weeks   | bacterial culture<br>rapid urease test                                                       | <sup>14</sup> C-UBT         | metronidazole  | 500 mg/12h        | 10d      |
|                              |            |             |                              |                          |                 |                           |                   |           |                                                                                              |                             | omeprazole     | 20 mg bid         | 7d       |
|                              |            |             |                              |                          |                 |                           |                   |           |                                                                                              |                             | amoxicillin    | 1000 mg bid       | 7d       |
|                              |            |             |                              | 10d bismuth              | 113             | 39 (24-47)                | 60/53             | 6 weeks   | rapid urease test                                                                            | <sup>14</sup> C-UBT         | clarithromycin | 500 mg bid        | 7d       |
|                              |            |             |                              |                          |                 |                           |                   |           |                                                                                              |                             | omeprazole     | 20 mg bid         | 10d      |
|                              |            |             |                              |                          |                 |                           |                   |           |                                                                                              |                             | amoxicillin    | 1000 mg bid       | 10d      |
| colloidal bismuth subcitrate | 240 mg bid | 10d         |                              |                          |                 |                           |                   |           |                                                                                              |                             |                |                   |          |
| Moayyedi P 1996 (83)         | UK         | 2           | RCT, single-center           | 7d triple                | 33              | 50.3±12.5                 | 21/12             | 4-6 weeks | histological examination, rapid urease test, <sup>13</sup> C-UBT, microbiological assessment | <sup>13</sup> C-UBT         | metronidazole  | 500 mg bid        | 10d      |
|                              |            |             |                              |                          |                 |                           |                   |           |                                                                                              |                             | lansoprazole   | 30 mg bid         | 7d       |
|                              |            |             |                              |                          |                 |                           |                   |           |                                                                                              |                             | amoxicillin    | 1000 mg bid       | 7d       |
|                              |            |             |                              | 14d triple               | 37              | 49.0±12.2                 | 13/24             | 4-6 weeks | histological examination, rapid urease test, <sup>13</sup> C-UBT, microbiological assessment | <sup>13</sup> C-UBT         | clarithromycin | 500 mg bid        | 7d       |
|                              |            |             |                              |                          |                 |                           |                   |           |                                                                                              |                             | lansoprazole   | 30 mg bid         | 14d      |
|                              |            |             |                              |                          |                 |                           |                   |           |                                                                                              |                             | amoxicillin    | 1000 mg bid       | 14d      |
| clarithromycin               | 500 mg bid | 14d         |                              |                          |                 |                           |                   |           |                                                                                              |                             |                |                   |          |
| Molina-Infante J 2012 (84)   | Spain      | 3           | prospective, RCT, open-label | 10d sequential (1)       | 9               | 49(27-67)                 | 7/2               | 8 weeks   | culture                                                                                      | histological examination    | PPI            | standard dose bid | 1-5d     |
|                              |            |             |                              |                          |                 |                           |                   |           |                                                                                              |                             | amoxicillin    | 1000 mg bid       | 1-5d     |
|                              |            |             |                              |                          |                 |                           |                   |           |                                                                                              |                             | clarithromycin | 500 mg bid        | 6-10d    |
|                              |            |             |                              |                          |                 |                           |                   |           |                                                                                              |                             | metronidazole  | 500 mg bid        | 6-10d    |

| Authors                    | Country | Jadad score | Study design                   | Patients' characteristic |                                                  |                           |                   |                   | Treatment                                  |                             |                |                   |          |
|----------------------------|---------|-------------|--------------------------------|--------------------------|--------------------------------------------------|---------------------------|-------------------|-------------------|--------------------------------------------|-----------------------------|----------------|-------------------|----------|
|                            |         |             |                                | Treatment                | No. of patients                                  | Age(range) or ± (SD) year | Man/Women (n1/n2) | Follow-up         | Confirmation of <i>H. pylori</i> infection | Confirmation of Eradication | Intervention   | Dosage            | Duration |
| Molina-Infante J 2010 (85) | Spain   | 3           | RCT, open-label, single-center | 10d concomitant (1)      | 9                                                | 52(21-76)                 | 4/5               | 8 weeks           | culture                                    | histological examination    | PPI            | standard dose bid | 6-10d    |
|                            |         |             |                                |                          |                                                  |                           |                   |                   |                                            |                             | PPI            | standard dose bid | 10d      |
|                            |         |             |                                |                          |                                                  |                           |                   |                   |                                            |                             | amoxicillin    | 1000 mg bid       | 10d      |
|                            |         |             |                                |                          |                                                  |                           |                   |                   |                                            |                             | clarithromycin | 500 mg bid        | 10d      |
|                            |         |             |                                |                          |                                                  |                           |                   |                   |                                            |                             | metronidazole  | 500 mg bid        | 10d      |
|                            |         |             |                                |                          |                                                  |                           |                   |                   |                                            |                             |                |                   |          |
|                            |         |             |                                | 10d concomitant (2)      | 36                                               | 50(20-77)                 | 14/22             | 8 weeks           | culture                                    | histological examination    | PPI            | standard dose bid | 10d      |
|                            |         |             |                                |                          |                                                  |                           |                   |                   |                                            |                             | amoxicillin    | 1000 mg bid       | 10d      |
|                            |         |             |                                |                          |                                                  |                           |                   |                   |                                            |                             | clarithromycin | 500 mg bid        | 10d      |
|                            |         |             |                                |                          |                                                  |                           |                   |                   |                                            |                             | metronidazole  | 500 mg bid        | 10d      |
|                            |         |             |                                |                          |                                                  |                           |                   |                   |                                            |                             |                |                   |          |
|                            |         |             |                                |                          |                                                  |                           |                   |                   |                                            |                             |                |                   |          |
| 10d triple (2)             | 33      | 54(29-83)   | 17/16                          | 8 weeks                  | culture                                          | histological examination  | PPI               | standard dose bid | 10d                                        |                             |                |                   |          |
|                            |         |             |                                |                          |                                                  |                           | amoxicillin       | 1000 mg bid       | 10d                                        |                             |                |                   |          |
|                            |         |             |                                |                          |                                                  |                           | clarithromycin    | 500 mg bid        | 10d                                        |                             |                |                   |          |
|                            |         |             |                                |                          |                                                  |                           |                   |                   |                                            |                             |                |                   |          |
|                            |         |             |                                |                          |                                                  |                           |                   |                   |                                            |                             |                |                   |          |
|                            |         |             |                                |                          |                                                  |                           |                   |                   |                                            |                             |                |                   |          |
| 10d triple                 | 115     | 44 (19-78)  | 54/61                          | 8 weeks                  | UBT, rapid urease test, histological examination | <sup>13</sup> C-UBT       | omeprazole        | 20 mg bid         | 10d                                        |                             |                |                   |          |
|                            |         |             |                                |                          |                                                  |                           | clarithromycin    | 500 mg bid        | 10d                                        |                             |                |                   |          |
|                            |         |             |                                |                          |                                                  |                           | amoxicillin       | 1000 mg bid       | 10d                                        |                             |                |                   |          |
|                            |         |             |                                |                          |                                                  |                           |                   |                   |                                            |                             |                |                   |          |
|                            |         |             |                                |                          |                                                  |                           |                   |                   |                                            |                             |                |                   |          |
|                            |         |             |                                |                          |                                                  |                           |                   |                   |                                            |                             |                |                   |          |
| 10d sequential             | 115     | 49(18-80)   | 54/61                          | 8 weeks                  | UBT, rapid urease test, histological examination | <sup>13</sup> C-UBT       | omeprazole        | 20 mg bid         | 1-5d                                       |                             |                |                   |          |
|                            |         |             |                                |                          |                                                  |                           | amoxicillin       | 1000 mg bid       | 1-5d                                       |                             |                |                   |          |
|                            |         |             |                                |                          |                                                  |                           | omeprazole        | 20 mg bid         | 6-10d                                      |                             |                |                   |          |
|                            |         |             |                                |                          |                                                  |                           | clarithromycin    | 500 mg bid        | 6-10d                                      |                             |                |                   |          |
|                            |         |             |                                |                          |                                                  |                           | metronidazole     | 500 mg bid        | 6-10d                                      |                             |                |                   |          |
|                            |         |             |                                |                          |                                                  |                           |                   |                   |                                            |                             |                |                   |          |
| 10d                        | 115     | 51 (18-84)  | 61/54                          | 8 weeks                  | UBT, rapid urease                                | <sup>13</sup> C-UBT       | omeprazole        | 20 mg bid         | 10d                                        |                             |                |                   |          |

| Authors                                          | Country         | Jadad score | Study design | Patients' characteristic |                 |                           |                   |           |                                             |                                                                           | Treatment           |                |             |       |
|--------------------------------------------------|-----------------|-------------|--------------|--------------------------|-----------------|---------------------------|-------------------|-----------|---------------------------------------------|---------------------------------------------------------------------------|---------------------|----------------|-------------|-------|
|                                                  |                 |             |              | Treatment                | No. of patients | Age(range) or ± (SD) year | Man/Women (n1/n2) | Follow-up | Confirmation of <i>H. pylori</i> infection  | Confirmation of Eradication                                               | Intervention        | Dosage         | Duration    |       |
| Molina-Infante J 2013 (86)                       | Italy and Spain | 3           | RCT          | levofloxacin             | 171             | 48 (18-85)                | 81/90             | 8 weeks   | test, histological examination              | <sup>13</sup> C-UBT, rapid urease test, culture, histological examination | <sup>13</sup> C-UBT | omeprazole     | 500 mg bid  | 10d   |
|                                                  |                 |             |              | 14d hybrid               |                 |                           |                   |           |                                             |                                                                           |                     | amoxicillin    | 1000 mg bid | 10d   |
|                                                  |                 |             |              | 14d concomitant          |                 |                           |                   |           |                                             |                                                                           |                     | omeprazole     | 40 mg bid   | 1-14d |
|                                                  |                 |             |              |                          |                 |                           |                   |           |                                             |                                                                           |                     | amoxicillin    | 1000 mg bid | 1-14d |
|                                                  |                 |             |              |                          |                 |                           |                   |           |                                             |                                                                           |                     | clarithromycin | 500 mg bid  | 8-14d |
|                                                  |                 |             |              |                          |                 |                           |                   |           |                                             |                                                                           |                     | nitroimidazole | 500 mg bid  | 8-14d |
| 14d concomitant                                  | omeprazole      | 40mg bid    | 14d          |                          |                 |                           |                   |           |                                             |                                                                           |                     |                |             |       |
| amoxicillin                                      | 1000 mg bid     | 14d         |              |                          |                 |                           |                   |           |                                             |                                                                           |                     |                |             |       |
| clarithromycin                                   | 500 mg bid      | 14d         |              |                          |                 |                           |                   |           |                                             |                                                                           |                     |                |             |       |
| nitroimidazole                                   | 500 mg bid      | 14d         |              |                          |                 |                           |                   |           |                                             |                                                                           |                     |                |             |       |
| Morse AL 2013 (87)                               | Canada          | 3           | RCT          | 10d triple               | 53              | 42(38-47)                 | 26/27             | 10 weeks  | <sup>13</sup> C-UBT, biopsies               | <sup>13</sup> C-UBT                                                       | <sup>13</sup> C-UBT | rabeprazole    | 20 mg bid   | 10d   |
|                                                  |                 |             |              | 10d sequential           |                 |                           |                   |           |                                             |                                                                           |                     | amoxicillin    | 1000 mg bid | 10d   |
|                                                  |                 |             |              |                          |                 |                           |                   |           |                                             |                                                                           |                     | clarithromycin | 500 mg bid  | 10d   |
|                                                  |                 |             |              |                          |                 |                           |                   |           |                                             |                                                                           |                     | rabeprazole    | 20 mg bid   | 1-5d  |
|                                                  |                 |             |              |                          |                 |                           |                   |           |                                             |                                                                           |                     | amoxicillin    | 1000 mg bid | 1-5d  |
|                                                  |                 |             |              | metronidazole            |                 |                           |                   |           |                                             |                                                                           |                     | 500 mg bid     | 6-10d       |       |
| clarithromycin                                   | 500 mg bid      | 6-10d       |              |                          |                 |                           |                   |           |                                             |                                                                           |                     |                |             |       |
| Multiple Center Study Group in Beijing Area 2004 | China           | 2           | RCT          | 7d triple                | 37              | 18-65                     | 197/61            | 4 weeks   | rapid urease test, histological examination | rapid urease test, histological examination                               | <sup>13</sup> C-UBT | omeprazole     | 20 mg bid   | 7d    |
|                                                  |                 |             |              | 14d triple               |                 |                           |                   |           |                                             |                                                                           |                     | amoxicillin    | 1000 mg bid | 7d    |
|                                                  |                 |             |              |                          |                 |                           |                   |           |                                             |                                                                           |                     | clarithromycin | 500 mg bid  | 7d    |
|                                                  |                 |             |              |                          |                 |                           |                   |           |                                             |                                                                           |                     | omeprazole     | 20 mg bid   | 14d   |
|                                                  |                 |             |              |                          |                 |                           |                   |           |                                             |                                                                           |                     | amoxicillin    | 1000 mg bid | 14d   |
|                                                  |                 |             |              | clarithromycin           |                 |                           |                   |           |                                             |                                                                           |                     | 500 mg bid     | 14d         |       |

| Authors                | Country | Jadad score | Study design      | Patients' characteristic |                 |                           |                   |           |                                                           |                                             | Treatment                                                                                                                                                                                                   |                                                                    |          |
|------------------------|---------|-------------|-------------------|--------------------------|-----------------|---------------------------|-------------------|-----------|-----------------------------------------------------------|---------------------------------------------|-------------------------------------------------------------------------------------------------------------------------------------------------------------------------------------------------------------|--------------------------------------------------------------------|----------|
|                        |         |             |                   | Treatment                | No. of patients | Age(range) or ± (SD) year | Man/Women (n1/n2) | Follow-up | Confirmation of <i>H. pylori</i> infection                | Confirmation of Eradication                 | Intervention                                                                                                                                                                                                | Dosage                                                             | Duration |
| (88)                   |         |             |                   | 7d triple                | 45              |                           |                   | 4 weeks   | rapid urease test, histological examination               | rapid urease test, histological examination | omeprazole                                                                                                                                                                                                  | 20 mg bid                                                          | 7d       |
|                        |         |             |                   |                          |                 |                           |                   |           |                                                           |                                             | amoxicillin                                                                                                                                                                                                 | 1000 mg bid                                                        | 7d       |
|                        |         |             |                   |                          |                 |                           |                   |           |                                                           |                                             | clarithromycin                                                                                                                                                                                              | 250 mg bid                                                         | 7d       |
|                        |         |             |                   | 14d triple               | 41              |                           |                   | 4 weeks   | rapid urease test, histological examination               | rapid urease test, histological examination | omeprazole                                                                                                                                                                                                  | 20 mg bid                                                          | 14d      |
|                        |         |             |                   |                          |                 |                           |                   |           |                                                           |                                             | amoxicillin                                                                                                                                                                                                 | 1000 mg bid                                                        | 14d      |
|                        |         |             |                   |                          |                 |                           |                   |           |                                                           |                                             | clarithromycin                                                                                                                                                                                              | 250 mg bid                                                         | 14d      |
| Myllyluoma E 2005 (89) | Finland | 5           | double-blind, RCT | 7d probiotic             | 23              | 57.3                      | 10/13             | 4 weeks   | <sup>13</sup> C-UBT, in-house enzyme immunoassay serology | <sup>13</sup> C-UBT                         | 65 mL milk-based fruit drink containing 1*10 <sup>9</sup> colony-forming units /mL Lactobacillus GG, L. rhamnosus LC705, Bifidobacterium breve Bb99 and Propionibacterium freudenreichii ssp. shermanii JS, | bid during the eradication treatment, qd for the following 3 weeks | 4 weeks  |
|                        |         |             |                   |                          |                 |                           |                   |           |                                                           |                                             | lansoprazole                                                                                                                                                                                                | 30 mg bid                                                          | 7d       |
|                        |         |             |                   |                          |                 |                           |                   |           |                                                           |                                             | clarithromycin                                                                                                                                                                                              | 500 mg bid                                                         | 7d       |
|                        |         |             |                   |                          |                 |                           |                   |           |                                                           |                                             | amoxicillin                                                                                                                                                                                                 | 1000 mg bid                                                        | 7d       |

| Authors            | Country | Jadad score | Study design      | Patients' characteristic |                 |                               |                   |           |                                                           | Treatment                   |                                                                     |                   |                |            |     |
|--------------------|---------|-------------|-------------------|--------------------------|-----------------|-------------------------------|-------------------|-----------|-----------------------------------------------------------|-----------------------------|---------------------------------------------------------------------|-------------------|----------------|------------|-----|
|                    |         |             |                   | Treatment                | No. of patients | Age(range) or $\pm$ (SD) year | Man/Women (n1/n2) | Follow-up | Confirmation of <i>H. pylori</i> infection                | Confirmation of Eradication | Intervention                                                        | Dosage            | Duration       |            |     |
| Nasa M 2013 (90)   | India   | 3           | open-labeled, RCT | 7d triple                | 24              | 53.8                          | 8/16              | 4 weeks   | <sup>13</sup> C-UBT, in-house enzyme immunoassay serology | <sup>13</sup> C-UBT         | lansoprazole                                                        | 30 mg bid         | 7d             |            |     |
|                    |         |             |                   |                          |                 |                               |                   |           |                                                           |                             | clarithromycin                                                      | 500 mg bid        | 7d             |            |     |
|                    |         |             |                   |                          |                 |                               |                   |           |                                                           |                             | amoxicillin                                                         | 1000 mg bid       | 7d             |            |     |
|                    |         |             |                   | 14d triple               | 120             | 39.2 $\pm$ 1.53               | 63/57             | 4 weeks   |                                                           |                             | rapid urease test, histological examination                         | rapid urease test | pantoprazole   | 40 mg bid  | 14d |
|                    |         |             |                   |                          |                 |                               |                   |           |                                                           |                             |                                                                     |                   | clarithromycin | 500 mg bid | 14d |
|                    |         |             |                   | 10d sequential           | 111             | 37.8 $\pm$ 1.49               | 68/43             | 4 weeks   | rapid urease test, histological examination               | rapid urease test           | pantoprazole                                                        | 40 mg bid         | 1-5d           |            |     |
|                    |         |             |                   |                          |                 |                               |                   |           |                                                           |                             | amoxicillin                                                         | 1000 mg bid       | 1-5d           |            |     |
|                    |         |             |                   |                          |                 |                               |                   |           |                                                           |                             | pantoprazole                                                        | 40 mg bid         | 6-10d          |            |     |
|                    |         |             |                   |                          |                 |                               |                   |           |                                                           |                             | clarithromycin                                                      | 500 mg bid        | 6-10d          |            |     |
|                    |         |             |                   |                          |                 |                               |                   |           |                                                           |                             | tinidazole                                                          | 500 mg bid        | 6-10d          |            |     |
| Nista EC 2004 (91) | Italy   | 4           | RCT, double-blind | 7d probiotic             | 60              | 46.2 $\pm$ 12.83              | 33/27             | 6 weeks   | <sup>13</sup> C-UBT                                       | <sup>13</sup> C-UBT         | clarithromycin                                                      | 500 mg bid        | 7d             |            |     |
|                    |         |             |                   |                          |                 |                               |                   |           |                                                           |                             | amoxicillin                                                         | 1000 mg bid       | 7d             |            |     |
|                    |         |             |                   |                          |                 |                               |                   |           |                                                           |                             | rabeprazole                                                         | 20 mg bid         | 7d             |            |     |
|                    |         |             |                   |                          |                 |                               |                   |           |                                                           |                             | vial(2 $\times$ 10 <sup>9</sup> spores of <i>Bacillus clausii</i> ) | tds               | 14d            |            |     |
|                    |         |             |                   | 7d triple                | 60              | 43.1 $\pm$ 13.36              | 25/35             | 6 weeks   | <sup>13</sup> C-UBT                                       | <sup>13</sup> C-UBT         | clarithromycin                                                      | 500 mg bid        | 7d             |            |     |
|                    |         |             |                   |                          |                 |                               |                   |           |                                                           |                             | amoxicillin                                                         | 1000 mg bid       | 7d             |            |     |
|                    |         |             |                   |                          |                 |                               |                   |           |                                                           |                             | rabeprazole                                                         | 20 mg bid         | 7d             |            |     |
| Nista EC 2006 (92) | Italy   | 3           | RCT               | 7d triple                | 100             | 50 $\pm$ 9.2                  | 46/54             | 6 weeks   | histological examination,                                 | <sup>13</sup> C-UBT         | clarithromycin                                                      | 500 mg bid        | 7d             |            |     |
|                    |         |             |                   |                          |                 |                               |                   |           |                                                           |                             | metronidazole                                                       | 500 mg bid        | 7d             |            |     |

| Authors           | Country     | Jadad score | Study design       | Patients' characteristic |                                             |                           |                   |             |                                               |                             | Treatment                                          |             |          |
|-------------------|-------------|-------------|--------------------|--------------------------|---------------------------------------------|---------------------------|-------------------|-------------|-----------------------------------------------|-----------------------------|----------------------------------------------------|-------------|----------|
|                   |             |             |                    | Treatment                | No. of patients                             | Age(range) or ± (SD) year | Man/Women (n1/n2) | Follow-up   | Confirmation of <i>H. pylori</i> infection    | Confirmation of Eradication | Intervention                                       | Dosage      | Duration |
| Oh HS 2012 (93)   | South Korea | 3           | open-label, RCT    | 7d                       | 100                                         | 49±10.3                   | 42/58             | 6 weeks     | histological examination, <sup>13</sup> C-UBT | <sup>13</sup> C-UBT         | esomeprazole                                       | 20 mg bid   | 7d       |
|                   |             |             |                    |                          |                                             |                           |                   |             |                                               |                             | clarithromycin                                     | 500 mg bid  | 7d       |
|                   |             |             |                    |                          |                                             |                           |                   |             |                                               |                             | levofloxacin                                       | 500 mg od   | 7d       |
|                   |             |             |                    |                          |                                             |                           |                   |             |                                               |                             | esomeprazole                                       | 20 mg bid   | 7d       |
|                   |             |             |                    | 7d triple                | 100                                         | 48±9.5                    | 44/56             | 6 weeks     | histological examination, <sup>13</sup> C-UBT | <sup>13</sup> C-UBT         | clarithromycin                                     | 500 mg bid  | 7d       |
|                   |             |             |                    |                          |                                             |                           |                   |             |                                               |                             | amoxicillin                                        | 1000 mg bid | 7d       |
|                   |             |             |                    |                          |                                             |                           |                   |             |                                               |                             | esomeprazole                                       | 20 mg bid   | 7d       |
|                   |             |             |                    |                          |                                             |                           |                   |             |                                               |                             |                                                    |             |          |
| 10d sequential    | 116         | 58.26±11.68 | 54/62              | 4 weeks                  | histological examination, rapid urease test | <sup>13</sup> C-UBT       | rabeprazole       | 20 mg bid   | 1-5d                                          |                             |                                                    |             |          |
|                   |             |             |                    |                          |                                             |                           | amoxicillin       | 1000 mg bid | 1-5d                                          |                             |                                                    |             |          |
|                   |             |             |                    |                          |                                             |                           | rabeprazole       | 20 mg bid   | 6-10d                                         |                             |                                                    |             |          |
|                   |             |             |                    |                          |                                             |                           | clarithromycin    | 500 mg bid  | 6-10d                                         |                             |                                                    |             |          |
| 7d triple         | 130         | 56.78±11.57 | 53/77              | 4 weeks                  | histological examination, rapid urease test | <sup>13</sup> C-UBT       | amoxicillin       | 1000 mg bid | 7d                                            |                             |                                                    |             |          |
|                   |             |             |                    |                          |                                             |                           | clarithromycin    | 500 mg bid  | 7d                                            |                             |                                                    |             |          |
|                   |             |             |                    |                          |                                             |                           | rabeprazole       | 20 mg bid   | 7d                                            |                             |                                                    |             |          |
|                   |             |             |                    |                          |                                             |                           |                   |             |                                               |                             |                                                    |             |          |
| Özdil K 2011 (94) | Turkey      | 2           | single-center, RCT | 14d probiotic            | 98                                          | 41.3±12.8                 | 29/69             | 5 weeks     | giemsa staining                               | stool antigen test          | lansoprazole                                       | 30 mg bid   | 14d      |
|                   |             |             |                    |                          |                                             |                           |                   |             |                                               |                             | clarithromycin                                     | 500 mg bid  | 14d      |
|                   |             |             |                    |                          |                                             |                           |                   |             |                                               |                             | amoxicillin                                        | 1000 mg bid | 14d      |
|                   |             |             |                    |                          |                                             |                           |                   |             |                                               |                             | 250 mg capsules containing saccharomyces boulardii | qd          | 14d      |

| Authors               | Country | Jadad score | Study design | Patients' characteristic |                 |                               |                   |             |                                               |                                               | Treatment                           |               |          |
|-----------------------|---------|-------------|--------------|--------------------------|-----------------|-------------------------------|-------------------|-------------|-----------------------------------------------|-----------------------------------------------|-------------------------------------|---------------|----------|
|                       |         |             |              | Treatment                | No. of patients | Age(range) or $\pm$ (SD) year | Man/Women (n1/n2) | Follow-up   | Confirmation of <i>H. pylori</i> infection    | Confirmation of Eradication                   | Intervention                        | Dosage        | Duration |
| Pai CG<br>2003 (95)   | India   | 2           | RCT          | 14d<br>levofloxacin      | 95              | 41.7 $\pm$ 10.7               | 27/68             | 5 weeks     | giemsa staining                               | stool antigen test                            | amoxicillin                         | 1000 mg bid   | 14d      |
|                       |         |             |              |                          |                 |                               |                   |             |                                               |                                               | esomeprazole                        | 40 mg bid     | 14d      |
|                       |         |             |              |                          |                 |                               |                   |             |                                               |                                               | levofloxacin                        | 500 mg qd     | 14d      |
|                       |         |             |              | 10d triple               | 35              | 41.7(19-69)                   | 32/3              | 30 days     | histological examination                      | endoscopy, biopsies                           | lansoprazole                        | 30 mg bid     | 10d      |
|                       |         |             |              |                          |                 |                               |                   |             |                                               |                                               | amoxicillin                         | 500 mg qid    | 10d      |
|                       |         |             |              |                          |                 |                               |                   |             |                                               |                                               | clarithromycin                      | 500 mg bid    | 10d      |
| Palmas F<br>2002 (96) | Italy   | 2           | RCT          | 10d bismuth              | 33              | 37.5(18-64)                   | 32/1              | 30 days     | histological examination                      | endoscopy, biopsies                           | tri-potassium di-citrato bismuthate | 120 mg qid    | 10d      |
|                       |         |             |              |                          |                 |                               |                   |             |                                               |                                               | metronidazole                       | 400 mg tid    | 10d      |
|                       |         |             |              |                          |                 |                               |                   |             |                                               |                                               | tetracycline                        | 500 mg qid    | 10d      |
|                       |         |             |              |                          |                 |                               |                   |             |                                               |                                               | lansoprazole                        | 30 mg bid     | 10d      |
|                       |         |             |              | 7d triple                | 66              | 54(31-78)                     | 36/30             | 4 weeks     | histological examination, <sup>13</sup> C-UBT | histological examination, <sup>13</sup> C-UBT | PPI                                 | standard dose | 7d       |
|                       |         |             |              |                          |                 |                               |                   |             |                                               |                                               | amoxicillin                         | 1000 mg bid   | 7d       |
|                       |         |             |              |                          |                 |                               |                   |             |                                               |                                               | clarithromycin                      | 500 mg bid    | 7d       |
|                       |         |             |              | 10d triple               | 42              | 57(39-69)                     | 21/21             | 4 weeks     | histological examination, <sup>13</sup> C-UBT | histological examination, <sup>13</sup> C-UBT | PPI                                 | standard dose | 10d      |
|                       |         |             |              |                          |                 |                               | amoxicillin       | 1000 mg bid | 10d                                           |                                               |                                     |               |          |
|                       |         |             |              |                          |                 |                               | clarithromycin    | 500 mg bid  | 10d                                           |                                               |                                     |               |          |
|                       |         |             |              |                          |                 |                               |                   |             | PPI                                           | standard dose                                 | 14d                                 |               |          |
|                       |         |             |              |                          |                 |                               |                   |             | amoxicillin                                   | 1000 mg bid                                   | 14d                                 |               |          |
|                       |         |             |              |                          |                 |                               |                   |             | clarithromycin                                | 500 mg bid                                    | 14d                                 |               |          |

| Authors                 | Country     | Jadad score | Study design                         | Patients' characteristic |                 |                               |                   |           |                                                                       |                                                                       | Treatment    |                |            |       |
|-------------------------|-------------|-------------|--------------------------------------|--------------------------|-----------------|-------------------------------|-------------------|-----------|-----------------------------------------------------------------------|-----------------------------------------------------------------------|--------------|----------------|------------|-------|
|                         |             |             |                                      | Treatment                | No. of patients | Age(range) or $\pm$ (SD) year | Man/Women (n1/n2) | Follow-up | Confirmation of <i>H. pylori</i> infection                            | Confirmation of Eradication                                           | Intervention | Dosage         | Duration   |       |
| Paoluzi OA<br>2010 (97) | Italy       | 3           | open-label,<br>RCT,<br>single-center | 10d<br>sequential        | 90              | 50 $\pm$ 13                   | 38/52             | 2 months  | UBT, stool antigen assay, rapid urease test, histological examination | UBT, stool antigen assay, urease rapid test, histological examination | esomeprazole | 20 mg bid      | 1-10d      |       |
|                         |             |             |                                      |                          |                 |                               |                   |           |                                                                       |                                                                       | amoxicillin  | 1000 mg bid    | 1-5d       |       |
|                         |             |             |                                      |                          |                 |                               |                   |           |                                                                       |                                                                       |              | clarithromycin | 500 mg bid | 6-10d |
|                         |             |             |                                      |                          |                 |                               |                   |           |                                                                       |                                                                       |              | tinidazole     | 500 mg bid | 6-10d |
| Paoluzi P<br>2006 (98)  | Italy       | 3           | RCT                                  | 7d triple                | 117             | 51 $\pm$ 15                   | 49/68             | 2 months  | UBT, stool antigen assay, rapid urease test, histological examination | UBT, stool antigen assay, urease rapid test, histological examination | esomeprazole | 20 mg bid      | 7d         |       |
|                         |             |             |                                      |                          |                 |                               |                   |           |                                                                       |                                                                       | amoxicillin  | 1000 mg bid    | 7d         |       |
|                         |             |             |                                      |                          |                 |                               |                   |           |                                                                       |                                                                       |              | clarithromycin | 500 mg bid | 7d    |
|                         |             |             |                                      | 14d triple               | 126             | 52 $\pm$ 13                   | 54/72             | 2 months  | histopathologic examination, biopsies, <sup>13</sup> C-UBT            | histopathologic examination, <sup>13</sup> C-UBT                      | omeprazole   | 20 mg bid      | 14d        |       |
|                         |             |             |                                      |                          |                 |                               |                   |           | amoxicillin                                                           | 1000 mg bid                                                           | 14d          |                |            |       |
|                         |             |             |                                      |                          |                 |                               |                   |           | clarithromycin                                                        | 500 mg bid                                                            | 14d          |                |            |       |
| Park HG<br>2012 (99)    | South Korea | 3           | open-label,<br>RCT                   | 10d<br>sequential        | 162             | 52.4 $\pm$ 10.6               | 93/69             | 4 weeks   | rapid urease test, <sup>13</sup> C-UBT, histological examination      | <sup>13</sup> C-UBT                                                   | rabeprazole  | 20 mg bid      | 1-5d       |       |
|                         |             |             |                                      |                          |                 |                               |                   |           |                                                                       |                                                                       | amoxicillin  | 1000 mg bid    | 1-5d       |       |
|                         |             |             |                                      |                          |                 |                               |                   |           |                                                                       |                                                                       |              | rabeprazole    | 20 mg bid  | 6-10d |
|                         |             |             |                                      |                          |                 |                               |                   |           |                                                                       |                                                                       |              | clarithromycin | 500mg bid  | 6-10d |
|                         |             |             |                                      |                          |                 |                               |                   |           | metronidazole                                                         | 500 mg bid                                                            | 6-10d        |                |            |       |
|                         |             |             |                                      | 7d triple                | 164             | 53.1 $\pm$ 14.3               | 81/83             | 4 weeks   | rapid urease test, <sup>13</sup> C-UBT, histological examination      | <sup>13</sup> C-UBT                                                   | rabeprazole  | 20 mg bid      | 7d         |       |
|                         |             |             |                                      |                          |                 |                               |                   |           |                                                                       | amoxicillin                                                           | 1000 mg bid  | 7d             |            |       |
|                         |             |             |                                      |                          |                 |                               |                   |           |                                                                       | clarithromycin                                                        | 500 mg bid   | 7d             |            |       |
| Park SK                 | South Korea | 2           | RCT                                  | 7d probiotic             | 176             | 45.2 $\pm$ 19.8               | 96/80             | 4 weeks   | histological                                                          | UBT                                                                   | omeprazole   | 20 mg bid      | 7d         |       |



| Authors                  | Country | Jadad score | Study design               | Patients' characteristic |                 |                               |                   |           |                                                               | Treatment                                                     |                                                                              |                   |                   |       |         |                                           |                     |              |           |      |
|--------------------------|---------|-------------|----------------------------|--------------------------|-----------------|-------------------------------|-------------------|-----------|---------------------------------------------------------------|---------------------------------------------------------------|------------------------------------------------------------------------------|-------------------|-------------------|-------|---------|-------------------------------------------|---------------------|--------------|-----------|------|
|                          |         |             |                            | Treatment                | No. of patients | Age(range) or $\pm$ (SD) year | Man/Women (n1/n2) | Follow-up | Confirmation of <i>H. pylori</i> infection                    | Confirmation of Eradication                                   | Intervention                                                                 | Dosage            | Duration          |       |         |                                           |                     |              |           |      |
| 2007 (100)               |         |             |                            |                          |                 |                               |                   |           | examination                                                   |                                                               | amoxicillin                                                                  | 1000 mg bid       | 7d                |       |         |                                           |                     |              |           |      |
|                          |         |             |                            |                          |                 |                               |                   |           |                                                               |                                                               | clarithromycin                                                               | 500 mg bid        | 7d                |       |         |                                           |                     |              |           |      |
|                          |         |             |                            |                          |                 |                               |                   |           |                                                               |                                                               | bacillus subtilis<br>2.5*10 <sup>9</sup>                                     | 2 capsules<br>tid | 8weeks            |       |         |                                           |                     |              |           |      |
|                          |         |             |                            |                          |                 |                               |                   |           |                                                               |                                                               | colony-forming<br>units /g,<br>streptococcus<br>faecium 22.5*10 <sup>9</sup> |                   |                   |       |         |                                           |                     |              |           |      |
|                          |         |             |                            |                          |                 |                               |                   |           |                                                               |                                                               | colony-forming<br>units /g                                                   |                   |                   |       |         |                                           |                     |              |           |      |
|                          |         |             |                            |                          |                 |                               |                   |           |                                                               |                                                               | 7d triple                                                                    | 176               | 47.6 $\pm$ 18.5   | 95/81 | 4 weeks | histological<br>examination               | UBT                 | omeprazole   | 20 mg bid | 7d   |
| Qian J 2012<br>(101)     | China   | 3           | RCT                        | 7d<br>levofloxacin       | 114             | 45.58 $\pm$ 12.81             | 56/58             | 4 weeks   | rapid urease test,<br><sup>13</sup> C-UBT                     | <sup>13</sup> C-UBT                                           | esomeprazole                                                                 | 20 mg bid         | 7d                |       |         |                                           |                     |              |           |      |
|                          |         |             |                            |                          |                 |                               |                   |           |                                                               |                                                               | amoxicillin                                                                  | 1000 mg bid       | 7d                |       |         |                                           |                     |              |           |      |
|                          |         |             |                            |                          |                 |                               |                   |           |                                                               |                                                               | levofloxacin                                                                 | 500 mg qd         | 7d                |       |         |                                           |                     |              |           |      |
|                          |         |             |                            |                          |                 |                               |                   |           |                                                               |                                                               | 10d<br>sequential                                                            | 115               | 44.22 $\pm$ 11.99 | 61/54 | 4 weeks | rapid urease test,<br><sup>13</sup> C-UBT | <sup>13</sup> C-UBT | esomeprazole | 20 mg bid | 1-5d |
|                          |         |             |                            |                          |                 |                               |                   |           |                                                               |                                                               | amoxicillin                                                                  | 1000 mg bid       | 1-5d              |       |         |                                           |                     |              |           |      |
|                          |         |             |                            |                          |                 |                               |                   |           |                                                               |                                                               | esomeprazole                                                                 | 20 mg bid         | 6-10d             |       |         |                                           |                     |              |           |      |
| Riquelme A<br>2007 (102) | Chile   | 1           | quasi-RCT,<br>open-labeled | 7d triple                | 69              | 47.5 $\pm$ 16                 | 27/42             | 6 weeks   | upper<br>gastro-intestinal<br>endoscopy, rapid<br>urease test | upper<br>gastro-intestinal<br>endoscopy,<br>rapid urease test | esomeprazole                                                                 | 500 mg bid        | 6-10d             |       |         |                                           |                     |              |           |      |
|                          |         |             |                            |                          |                 |                               |                   |           |                                                               |                                                               | omeprazole                                                                   | 20 mg bid         | 7d                |       |         |                                           |                     |              |           |      |
|                          |         |             |                            |                          |                 |                               |                   |           |                                                               |                                                               | amoxicillin                                                                  | 1000 mg bid       | 7d                |       |         |                                           |                     |              |           |      |
|                          |         |             |                            |                          |                 |                               |                   |           |                                                               |                                                               | clarithromycin                                                               | 500 mg bid        | 7d                |       |         |                                           |                     |              |           |      |
|                          |         |             |                            |                          |                 |                               |                   |           |                                                               |                                                               | tinidazole                                                                   | 500 mg bid        | 6-10d             |       |         |                                           |                     |              |           |      |
|                          |         |             |                            |                          |                 |                               |                   |           |                                                               |                                                               | omeprazole                                                                   | 20 mg bid         | 7d                |       |         |                                           |                     |              |           |      |

| Authors                  | Country | Jadad score | Study design                    | Patients' characteristic |                 |                               |                   |           |                                                      |                                                      | Treatment    |                 |                |             |       |
|--------------------------|---------|-------------|---------------------------------|--------------------------|-----------------|-------------------------------|-------------------|-----------|------------------------------------------------------|------------------------------------------------------|--------------|-----------------|----------------|-------------|-------|
|                          |         |             |                                 | Treatment                | No. of patients | Age(range) or $\pm$ (SD) year | Man/Women (n1/n2) | Follow-up | Confirmation of <i>H. pylori</i> infection           | Confirmation of Eradication                          | Intervention | Dosage          | Duration       |             |       |
|                          |         |             |                                 | 14d triple               | 62              | 45 $\pm$ 15                   | 18/44             | 6 weeks   | upper gastro-intestinal endoscopy, rapid urease test | upper gastro-intestinal endoscopy, rapid urease test | omeprazole   | 20 mg bid       | 14d            |             |       |
|                          |         |             |                                 |                          |                 |                               |                   |           |                                                      |                                                      |              | amoxicillin     | 1000 mg bid    | 14d         |       |
|                          |         |             |                                 |                          |                 |                               |                   |           |                                                      |                                                      |              | clarithromycin  | 500 mg bid     | 14d         |       |
|                          |         |             |                                 |                          |                 |                               |                   |           |                                                      |                                                      |              |                 |                |             |       |
| Robles-Jara C 2008 (103) | Ecuador | 2           | RCT, open-label                 | 7d triple                | 68              | 42 $\pm$ 11                   | 23/45             | 8 weeks   | histological examination, rapid urease tests         | histological examination                             | omeprazole   | 20 mg bid       | 7d             |             |       |
|                          |         |             |                                 |                          |                 |                               |                   |           |                                                      |                                                      |              | clarithromycin  | 500 mg bid     | 7d          |       |
|                          |         |             |                                 |                          |                 |                               |                   |           |                                                      |                                                      |              |                 | amoxicillin    | 1000 mg bid | 7d    |
|                          |         |             |                                 | 10d triple               | 68              | 44 $\pm$ 12                   | 27/41             | 8 weeks   | histological examination, rapid urease tests         | histological examination                             | omeprazole   | 20 mg bid       | 10d            |             |       |
|                          |         |             |                                 |                          |                 |                               |                   |           |                                                      | clarithromycin                                       | 500 mg bid   | 10d             |                |             |       |
|                          |         |             |                                 |                          |                 |                               |                   |           |                                                      | amoxicillin                                          | 1000 mg bid  | 10d             |                |             |       |
| Sardarian H 2013 (104)   | Iran    | 3           | RCT                             | 14d hybrid               | 210             | 43.43 $\pm$ 12.87             | 106/104           | 8 weeks   | antral biopsy, rapid urease test                     | UBT                                                  | pantoprazole | 40 mg bid       | 1-14d          |             |       |
|                          |         |             |                                 |                          |                 |                               |                   |           |                                                      |                                                      |              | amoxicillin     | 1000 mg bid    | 1-14d       |       |
|                          |         |             |                                 |                          |                 |                               |                   |           |                                                      |                                                      |              |                 | tinidazole     | 500 mg bid  | 8-14d |
|                          |         |             |                                 |                          |                 |                               |                   |           |                                                      |                                                      |              |                 | clarithromycin | 500 mg bid  | 8-14d |
|                          |         |             |                                 |                          |                 |                               |                   |           |                                                      |                                                      |              |                 |                |             |       |
|                          |         |             |                                 | 10d sequential           | 210             | 41.93 $\pm$ 13.44             | 97/113            | 8 weeks   | antral biopsy, rapid urease test                     | UBT                                                  | pantoprazole | 40 mg bid       | 1-5d           |             |       |
|                          |         |             |                                 |                          |                 |                               |                   |           |                                                      | amoxicillin                                          | 1000 mg bid  | 1-5d            |                |             |       |
|                          |         |             |                                 |                          |                 |                               |                   |           |                                                      | pantoprazole                                         | 40 mg bid    | 6-10d           |                |             |       |
|                          |         |             |                                 |                          |                 |                               |                   |           |                                                      | tinidazole                                           | 500 mg bid   | 6-10d           |                |             |       |
|                          |         |             |                                 |                          |                 |                               |                   |           |                                                      | clarithromycin                                       | 500 mg bid   | 6-10d           |                |             |       |
| Savarino V 1999 (105)    | Italy   | 3           | RCT, controlled, parallel-group | 7d                       | 55              | 55 $\pm$ 13                   | 25/30             | 4 weeks   | rapid urease test, histological examination          | <sup>13</sup> C-UBT                                  | ranitidine   | 400 mg bid      | 7d             |             |       |
|                          |         |             |                                 | ranitidine               |                 |                               |                   |           |                                                      |                                                      |              | bismuth citrate |                |             |       |
|                          |         |             |                                 | bismuth                  |                 |                               |                   |           |                                                      |                                                      |              | metronidazole   | 500 mg bid     | 7d          |       |
|                          |         |             |                                 |                          |                 |                               |                   |           |                                                      |                                                      |              | clarithromycin  | 250 mg bid     | 7d          |       |

| Authors                  | Country | Jadad score | Study design                          | Patients' characteristic |                 |                               |                   |           |                                                |                                                     | Treatment       |             |          |
|--------------------------|---------|-------------|---------------------------------------|--------------------------|-----------------|-------------------------------|-------------------|-----------|------------------------------------------------|-----------------------------------------------------|-----------------|-------------|----------|
|                          |         |             |                                       | Treatment                | No. of patients | Age(range) or $\pm$ (SD) year | Man/Women (n1/n2) | Follow-up | Confirmation of <i>H. pylori</i> infection     | Confirmation of Eradication                         | Intervention    | Dosage      | Duration |
|                          |         |             |                                       | 10d                      | 55              | 54 $\pm$ 13                   | 28/27             | 4 weeks   | rapid urease test, histological examination    | <sup>13</sup> C-UBT                                 | ranitidine      | 400 mg bid  | 10d      |
|                          |         |             |                                       | ranitidine               |                 |                               |                   |           |                                                |                                                     | bismuth citrate |             |          |
|                          |         |             |                                       | bismuth                  |                 |                               |                   |           |                                                |                                                     | metronidazole   | 500 mg bid  | 10d      |
|                          |         |             |                                       |                          |                 |                               |                   |           |                                                |                                                     | clarithromycin  | 250 mg bid  | 10d      |
| Savarino V 2000 (106)    | Italy   | 3           | RCT                                   | 7d                       | 70              | 50 $\pm$ 13                   | 36/34             | 4 weeks   | rapid urease testing, histological examination | rapid urease testing, histological examination      | ranitidine      | 400 mg bid  | 7d       |
|                          |         |             |                                       | ranitidine               |                 |                               |                   |           |                                                |                                                     | bismuth citrate |             |          |
|                          |         |             |                                       | bismuth                  |                 |                               |                   |           |                                                |                                                     | clarithromycin  | 250 mg bid  | 7d       |
|                          |         |             |                                       |                          |                 |                               |                   |           |                                                |                                                     | metronidazole   | 500 mg bid  | 7d       |
|                          |         |             |                                       | 7d triple                | 70              | 53 $\pm$ 11                   | 41/29             | 4 weeks   | rapid urease testing, histological examination | rapid urease testing test, histological examination | omeprazole      | 20 mg od    | 7d       |
|                          |         |             |                                       |                          |                 |                               |                   |           |                                                |                                                     | clarithromycin  | 250 mg bid  | 7d       |
|                          |         |             |                                       |                          |                 |                               |                   |           |                                                |                                                     | metronidazole   | 500 mg bid  | 7d       |
|                          |         |             |                                       |                          |                 |                               |                   |           |                                                |                                                     |                 |             |          |
| Scaccianoce G 2006 (107) | Italy   | 3           | parallel, open-label, two-center, RCT | 7d triple                | 70              | 54 $\pm$ 12                   | 34/36             | 4-6 weeks | histological examination, rapid urease test    | <sup>13</sup> C-UBT                                 | esomeprazole    | 20 mg bid   | 7d       |
|                          |         |             |                                       |                          |                 |                               |                   |           |                                                |                                                     | clarithromycin  | 1000 mg bid | 7d       |
|                          |         |             |                                       |                          |                 |                               |                   |           |                                                |                                                     | amoxicillin     | 500 mg bid  | 7d       |
|                          |         |             |                                       |                          |                 |                               |                   |           |                                                |                                                     | esomeprazole    | 20 mg bid   | 1-5d     |
|                          |         |             |                                       |                          |                 |                               |                   |           |                                                |                                                     |                 |             |          |
|                          |         |             |                                       | 10d sequential           | 72              | 55 $\pm$ 14                   | 32/40             | 4-6 weeks | histological examination, rapid urease test    | <sup>13</sup> C-UBT                                 | amoxicillin     | 1000 mg bid | 1-5d     |
|                          |         |             |                                       |                          |                 |                               |                   |           |                                                |                                                     | esomeprazole    | 20 mg bid   | 6-10d    |
|                          |         |             |                                       |                          |                 |                               |                   |           |                                                |                                                     | clarithromycin  | 500 mg bid  | 6-10d    |
|                          |         |             |                                       |                          |                 |                               |                   |           |                                                |                                                     | tinidazole      | 500 mg bid  | 6-10d    |
|                          |         |             |                                       | 10d triple               | 71              | 53 $\pm$ 16                   | 33/38             | 4-6 weeks | histological                                   | <sup>13</sup> C-UBT                                 | esomeprazole    | 20 mg bid   | 10d      |

| Authors                  | Country          | Jadad score | Study design                   | Patients' characteristic |                          |                           |                   |                  |                                             | Treatment                   |                       |              |          |
|--------------------------|------------------|-------------|--------------------------------|--------------------------|--------------------------|---------------------------|-------------------|------------------|---------------------------------------------|-----------------------------|-----------------------|--------------|----------|
|                          |                  |             |                                | Treatment                | No. of patients          | Age(range) or ± (SD) year | Man/Women (n1/n2) | Follow-up        | Confirmation of <i>H. pylori</i> infection  | Confirmation of Eradication | Intervention          | Dosage       | Duration |
| Scaccianoce G 2008 (108) | Italy            | 1           | RCT, open-label                | 7d triple                | 16                       | 48                        | 6/10              | 4-6 weeks        | histological examination, rapid urease test | <sup>13</sup> C-UBT         | clarithromycin        | 1000 mg bid  | 10d      |
|                          |                  |             |                                |                          |                          |                           |                   |                  |                                             |                             | amoxicillin           | 500 mg bid   | 10d      |
|                          |                  |             |                                |                          |                          |                           |                   |                  |                                             |                             | lansoprazole          | 30 mg bid    | 7d       |
|                          |                  |             |                                |                          |                          |                           |                   |                  |                                             |                             | clarithromycin        | 500 mg bid   | 7d       |
|                          |                  |             |                                |                          |                          |                           |                   |                  |                                             |                             | amoxicillin           | 1000 mg bid  | 7d       |
|                          |                  |             |                                | 7d probiotic             | 17                       | 51                        | 8/9               | 4-6 weeks        | histological examination                    | <sup>13</sup> C-UBT         | lansoprazole          | 30 mg bid    | 7d       |
|                          |                  |             |                                |                          |                          |                           |                   |                  |                                             |                             | clarithromycin        | 500 mg bid   | 7d       |
|                          |                  |             |                                |                          |                          |                           |                   |                  |                                             |                             | amoxicillin           | 1000 mg bid  | 7d       |
|                          |                  |             |                                |                          |                          |                           |                   |                  |                                             |                             | Lactobacillus reuteri | 1 tablet bid | 7d       |
|                          |                  |             |                                |                          |                          |                           |                   |                  |                                             |                             | 14d probiotic         | 17           | 52       |
| clarithromycin           | 500 mg bid       | 14d         |                                |                          |                          |                           |                   |                  |                                             |                             |                       |              |          |
| amoxicillin              | 1000 mg bid      | 14d         |                                |                          |                          |                           |                   |                  |                                             |                             |                       |              |          |
| probiotic mixture        | 5000 mg/dose bid | 14d         |                                |                          |                          |                           |                   |                  |                                             |                             |                       |              |          |
| 7d probiotic             | 15               | 50          | 7/8                            | 4-6 weeks                | histological examination | <sup>13</sup> C-UBT       | lansoprazole      | 30 mg bid        | 7d                                          |                             |                       |              |          |
|                          |                  |             |                                |                          |                          |                           | clarithromycin    | 500 mg bid       | 7d                                          |                             |                       |              |          |
|                          |                  |             |                                |                          |                          |                           | amoxicillin       | 1000 mg bid      | 7d                                          |                             |                       |              |          |
|                          |                  |             |                                |                          |                          |                           | probiotic mixture | 5000 mg/dose bid | 7d                                          |                             |                       |              |          |
|                          |                  |             |                                |                          |                          |                           |                   |                  |                                             |                             |                       |              |          |
| Seddik H 2013 (109)      | Morocco          | 3           | open-label, single-center, RCT | 10d sequential           | 140                      | 43.1±12.8                 | 81/59             | 4-6 weeks        | histological examination                    | <sup>13</sup> C-UBT         | omeprazole            | 20 mg bid    | 1-5d     |
|                          |                  |             |                                |                          |                          |                           |                   |                  |                                             |                             | amoxicillin           | 1000 mg bid  | 1-5d     |
|                          |                  |             |                                |                          |                          |                           |                   |                  |                                             |                             | omeprazole            | 20 mg bid    | 6-10d    |
|                          |                  |             |                                |                          |                          |                           |                   |                  |                                             |                             | tinidazole            | 500 mg bid   | 6-10d    |

| Authors                 | Country     | Jadad score | Study design | Patients' characteristic |                 |                               |                   |           |                                                                  | Treatment                                                        |                                                      |             |          |
|-------------------------|-------------|-------------|--------------|--------------------------|-----------------|-------------------------------|-------------------|-----------|------------------------------------------------------------------|------------------------------------------------------------------|------------------------------------------------------|-------------|----------|
|                         |             |             |              | Treatment                | No. of patients | Age(range) or $\pm$ (SD) year | Man/Women (n1/n2) | Follow-up | Confirmation of <i>H. pylori</i> infection                       | Confirmation of Eradication                                      | Intervention                                         | Dosage      | Duration |
|                         |             |             |              |                          |                 |                               |                   |           |                                                                  |                                                                  | clarithromycin                                       | 500 mg bid  | 6-10d    |
|                         |             |             |              | 7d triple                | 141             | 42.9 $\pm$ 13.1               | 82/59             | 4-6 weeks | histological examination                                         | <sup>13</sup> C-UBT                                              | omeprazole                                           | 20 mg bid   | 7d       |
|                         |             |             |              |                          |                 |                               |                   |           |                                                                  |                                                                  | amoxicillin                                          | 1000 mg bid | 7d       |
|                         |             |             |              |                          |                 |                               |                   |           |                                                                  |                                                                  | clarithromycin                                       | 500 mg bid  | 7d       |
| Sheu BS<br>2002 (110)   | Taiwan      | 2           | RCT          | 7d probiotic             | 80              | 47.8                          | 40/40             | 4 weeks   | <sup>13</sup> C-UBT, histological examination, rapid urease test | <sup>13</sup> C-UBT, histological examination, rapid urease test | lansoprazole                                         | 30 mg bid   | 7d       |
|                         |             |             |              |                          |                 |                               |                   |           |                                                                  |                                                                  | amoxicillin                                          | 1000 mg bid | 7d       |
|                         |             |             |              |                          |                 |                               |                   |           |                                                                  |                                                                  | clarithromycin                                       | 500 mg bid  | 7d       |
|                         |             |             |              |                          |                 |                               |                   |           |                                                                  |                                                                  | Lactobacillus- and Bifidobacterium-containing yogurt | 200 ml bid  | 5 weeks  |
|                         |             |             |              | 7d triple                | 80              | 45.9                          | 38/42             | 8 weeks   | <sup>13</sup> C-UBT, histological examination, rapid urease test | <sup>13</sup> C-UBT, histological examination, rapid urease test | lansoprazole                                         | 30 mg bid   | 7d       |
|                         |             |             |              |                          |                 |                               |                   |           |                                                                  |                                                                  | amoxicillin                                          | 1000 mg bid | 7d       |
|                         |             |             |              |                          |                 |                               |                   |           |                                                                  |                                                                  | clarithromycin                                       | 500 mg bid  | 7d       |
| Sokwala A<br>2012 (111) | Kenya       | 3           | RCT          | 7d triple                | 60              | 34 $\pm$ 10                   | 25/35             | 6 weeks   | stool antigen tests                                              | stool antigen tests                                              | esomeprazole                                         | 20 mg bid   | 7d       |
|                         |             |             |              |                          |                 |                               |                   |           |                                                                  |                                                                  | amoxicillin                                          | 1000 mg bid | 7d       |
|                         |             |             |              |                          |                 |                               |                   |           |                                                                  |                                                                  | clarithromycin                                       | 500 mg bid  | 7d       |
|                         |             |             |              | 14d triple               | 60              | 36 $\pm$ 11                   | 24/36             | 6 weeks   | stool antigen tests                                              | stool antigen tests                                              | esomeprazole                                         | 20 mg bid   | 14d      |
|                         |             |             |              |                          |                 |                               |                   |           |                                                                  |                                                                  | amoxicillin                                          | 1000 mg bid | 14d      |
|                         |             |             |              |                          |                 |                               |                   |           |                                                                  |                                                                  | clarithromycin                                       | 500 mg bid  | 14d      |
| Song MJ<br>2010 (112)   | South Korea | 3           | RCT          | 7d triple                | 331             | 49.84 $\pm$ 11.4              | 219/112           | 4 weeks   | rapid urease test, histological examination                      | <sup>13</sup> C-UBT                                              | omeprazole                                           | 20 mg bid   | 7d       |
|                         |             |             |              |                          |                 |                               |                   |           |                                                                  |                                                                  | amoxicillin                                          | 1000 mg bid | 7d       |
|                         |             |             |              |                          |                 |                               |                   |           |                                                                  |                                                                  | clarithromycin                                       | 500 mg bid  | 7d       |

| Authors              | Country | Jadad score | Study design                    | Patients' characteristic |                 |                               |                   |           |                                             | Treatment                                   |                                                                     |                                                                            |                          |         |
|----------------------|---------|-------------|---------------------------------|--------------------------|-----------------|-------------------------------|-------------------|-----------|---------------------------------------------|---------------------------------------------|---------------------------------------------------------------------|----------------------------------------------------------------------------|--------------------------|---------|
|                      |         |             |                                 | Treatment                | No. of patients | Age(range) or $\pm$ (SD) year | Man/Women (n1/n2) | Follow-up | Confirmation of <i>H. pylori</i> infection  | Confirmation of Eradication                 | Intervention                                                        | Dosage                                                                     | Duration                 |         |
|                      |         |             |                                 | 7d probiotic             | 330             | 49.76 $\pm$ 11.7              | 185/145           | 4 weeks   | rapid urease test, histological examination | <sup>13</sup> C-UBT                         | omeprazole<br>amoxicillin<br>clarithromycin                         | 20 mg bid<br>1000 mg bid<br>500 mg bid                                     | 7d<br>7d<br>7d           |         |
|                      |         |             |                                 |                          |                 |                               |                   |           |                                             |                                             |                                                                     | Saccharomyces boulardii 3 $\times$ 10 <sup>10</sup> colony-forming units/g | tid                      | 4 weeks |
|                      |         |             |                                 | 14d triple               | 104             | 46.22(19-83)                  | 36/68             | 6 weeks   | UBT, histological examination               | UBT                                         | lansoprazole<br>amoxicillin<br>clarithromycin                       | 30 mg bid<br>1000 mg bid<br>500 mg bid                                     | 14d<br>14d<br>14d        |         |
|                      |         |             |                                 | 10d bismuth              | 102             | 41.88(17-72)                  | 39/63             | 6 weeks   | UBT, histological examination               | UBT                                         | bismuth subcitrate<br>lansoprazole<br>tetracycline<br>metronidazole | 300 mg qid<br>30 mg bid<br>500 mg qid<br>500 mg bid                        | 10d<br>10d<br>10d<br>10d |         |
| Spinzi GC 2000 (114) | Italy   | 3           | multi-center, RCT, single-blind | 7d                       | 97              | 47.0(21-80)                   | 61/36             | 4-6 weeks | rapid urease test, histological examination | rapid urease test, histological examination | ranitidine<br>bismuth citrate<br>amoxycillin<br>clarithromycin      | 400 mg bid                                                                 | 7d<br>7d<br>7d<br>7d     |         |
|                      |         |             |                                 | 7d triple                | 95              | 47.2(18-80)                   | 63/32             | 4-6 weeks | rapid urease test, histological examination | rapid urease test, histological examination | omeprazole<br>amoxycillin<br>clarithromycin                         | 20 mg bid<br>1000 mg bid<br>500 mg bid                                     | 7d<br>7d<br>7d           |         |
|                      |         |             |                                 |                          |                 |                               |                   |           |                                             |                                             |                                                                     |                                                                            |                          |         |
|                      |         |             |                                 |                          |                 |                               |                   |           |                                             |                                             |                                                                     |                                                                            |                          |         |
| Sun QJ 2010 (115)    | China   | 2           | RCT, open-label                 | 7d bismuth               | 80              | 42.2 (20-74)                  | 45/35             | 6 weeks   | histological examination, rapid             | <sup>13</sup> C-UBT                         | omeprazole<br>amoxicillin                                           | 20 mg bid<br>1000 mg bid                                                   | 7d<br>7d                 |         |

| Authors               | Country | Jadad score | Study design      | Patients' characteristic |                 |                           |                   |           |                                                                  | Treatment                                                        |                            |             |          |
|-----------------------|---------|-------------|-------------------|--------------------------|-----------------|---------------------------|-------------------|-----------|------------------------------------------------------------------|------------------------------------------------------------------|----------------------------|-------------|----------|
|                       |         |             |                   | Treatment                | No. of patients | Age(range) or ± (SD) year | Man/Women (n1/n2) | Follow-up | Confirmation of <i>H. pylori</i> infection                       | Confirmation of Eradication                                      | Intervention               | Dosage      | Duration |
|                       |         |             |                   |                          |                 |                           |                   |           | urease test, culture                                             |                                                                  | clarithromycin             | 500 mg bid  | 7d       |
|                       |         |             |                   |                          |                 |                           |                   |           |                                                                  |                                                                  | bismuth                    | 220 mg bid  | 7d       |
|                       |         |             |                   |                          |                 |                           |                   |           |                                                                  |                                                                  | potassium citrate          |             |          |
|                       |         |             |                   | 14d bismuth              | 80              | 44.8 (18-75)              | 42/38             | 6 weeks   | histological examination, rapid urease test, culture             | <sup>13</sup> C-UBT                                              | omeprazole                 | 20 mg bid   | 14d      |
|                       |         |             |                   |                          |                 |                           |                   |           |                                                                  |                                                                  | amoxicillin                | 1000 mg bid | 14d      |
|                       |         |             |                   |                          |                 |                           |                   |           |                                                                  |                                                                  | clarithromycin             | 500 mg bid  | 14d      |
|                       |         |             |                   |                          |                 |                           |                   |           |                                                                  |                                                                  | bismuth                    | 220 mg bid  | 14d      |
|                       |         |             |                   |                          |                 |                           |                   |           |                                                                  |                                                                  | potassium citrate          |             |          |
| Sung JJ 1998 (116)    | China   | 2           | single-blind, RCT | 7d ranitidine bismuth    | 50              | 45(18-67)                 | 32/18             | 4 weeks   | rapid urease test, histological examination, <sup>13</sup> C-UBT | rapid urease test, histological examination, <sup>13</sup> C-UBT | ranitidine bismuth citrate | 400 mg bid  | 7d       |
|                       |         |             |                   | 7d triple                | 48              | 44(20-69)                 | 39/9              | 4 weeks   | rapid urease test, histological examination, <sup>13</sup> C-UBT | rapid urease test, histological examination, <sup>13</sup> C-UBT | omeprazole                 | 20 mg bid   | 7d       |
|                       |         |             |                   |                          |                 |                           |                   |           |                                                                  |                                                                  | amoxicillin                | 1000 mg bid | 7d       |
|                       |         |             |                   |                          |                 |                           |                   |           |                                                                  |                                                                  | clarithromycin             | 500 mg bid  | 7d       |
| Taghavi SA 2009 (117) | Iran    | 2           | RCT, double-blind | 14d bismuth              | 69              |                           |                   | 4 weeks   | histological examination, rapid urease test                      | <sup>13</sup> C-UBT                                              | amoxicillin                | 1000 mg bid | 14d      |
|                       |         |             |                   |                          |                 | NA                        | NA                |           |                                                                  |                                                                  | omeprazole                 | 20 mg bid   | 14d      |
|                       |         |             |                   |                          |                 |                           |                   |           |                                                                  |                                                                  | furazolidone               | 100 mg bid  | 14d      |
|                       |         |             |                   |                          |                 |                           |                   |           |                                                                  |                                                                  | bismuth                    | 240 mg bid  | 14d      |
|                       |         |             |                   | 14d triple               | 53              |                           |                   | 4 weeks   | histological examination, rapid urease test                      | <sup>13</sup> C-UBT                                              | amoxicillin                | 1000 mg bid | 14d      |
|                       |         |             |                   |                          |                 |                           |                   |           |                                                                  |                                                                  | clarithromycin             | 500 mg bid  | 14d      |
|                       |         |             |                   |                          |                 |                           |                   |           |                                                                  |                                                                  | omeprazole                 | 20 mg bid   | 14d      |
| Telaku S 2013 (118)   | Kosovo  | 1           | RCT               | 7d levofloxacin          | 58              | 43.33±15.54               | 29/29             | 4 weeks   | histological, rapid urease test, H                               | histological, rapid urease                                       | omeprazole                 | 20 mg bid   | 7d       |
|                       |         |             |                   |                          |                 |                           |                   |           |                                                                  |                                                                  | levofloxacin               | 500 mg oid  | 7d       |

| Authors            | Country | Jadad score  | Study design                   | Patients' characteristic    |                               |                           |                   |           |                                                                 | Treatment                                                       |                |             |          |
|--------------------|---------|--------------|--------------------------------|-----------------------------|-------------------------------|---------------------------|-------------------|-----------|-----------------------------------------------------------------|-----------------------------------------------------------------|----------------|-------------|----------|
|                    |         |              |                                | Treatment                   | No. of patients               | Age(range) or ± (SD) year | Man/Women (n1/n2) | Follow-up | Confirmation of <i>H. pylori</i> infection                      | Confirmation of Eradication                                     | Intervention   | Dosage      | Duration |
| Ungan M 2001 (119) | Turkey  | 2            | open-label, RCT                | 10d<br>levofloxacin         | 47                            | 37.72±13.45               | 17/30             | 4 weeks   | pylori stool antigen                                            | test, <i>H. pylori</i> stool antigen                            | amoxicillin    | 1000 mg bid | 7d       |
|                    |         |              |                                |                             |                               |                           |                   |           | histological, rapid urease test, <i>H. pylori</i> stool antigen | histological, rapid urease test, <i>H. pylori</i> stool antigen | omeprazole     | 20 mg bid   | 10d      |
|                    |         |              |                                | 7d<br>concomitant           | 25                            |                           |                   | 6 weeks   | rapid urease test, histological examination                     | rapid urease test, histological examination                     | lansoprazole   | 30 mg qd    | 1-28d    |
|                    |         |              |                                |                             |                               |                           |                   |           | amoxicillin                                                     | 1000 mg bid                                                     | 1-7d           |             |          |
|                    |         |              |                                | 10d triple                  | 30                            |                           |                   | 6 weeks   | rapid urease test, histological examination                     | rapid urease test, histological examination                     | clarithromycin | 500 mg bid  | 1-7d     |
|                    |         |              |                                |                             |                               |                           |                   |           | omeprazole                                                      | 250 mg bid                                                      | 1-7d           |             |          |
|                    |         |              |                                | 10d triple                  | 30                            | 37±13                     | NA                | 6 weeks   | rapid urease test, histological examination                     | rapid urease test, histological examination                     | omeprazole     | 20 mg bid   | 1-7d     |
|                    |         |              |                                |                             |                               |                           |                   |           | omeprazole                                                      | 20 mg qd                                                        | 8-28d          |             |          |
|                    |         |              |                                | 7d<br>ranitidine<br>bismuth | 30                            |                           |                   | 6 weeks   | rapid urease test, histological examination                     | rapid urease test, histological examination                     | amoxicillin    | 1000 mg bid | 1-10d    |
|                    |         |              |                                |                             |                               |                           |                   |           | clarithromycin                                                  | 500 mg bid                                                      | 1-10d          |             |          |
| 14d bismuth        | 100     | 41.5 (18-68) | 59/41                          | 6 weeks                     | UBT, histological examination | <sup>14</sup> C-UBT       | lansoprazole      | 30 mg qd  | 1-28d                                                           |                                                                 |                |             |          |
|                    |         |              |                                |                             | bismuth citrate               | amoxicillin               | 1000 mg bid       | 1-7d      |                                                                 |                                                                 |                |             |          |
| Uygun A 2012 (120) | Turkey  | 3            | open-label, single-center, RCT | 14d<br>concomitant          | 100                           | 40.9 (19-72)              | 53/47             | 6 weeks   | UBT, histological examination                                   | <sup>14</sup> C-UBT                                             | esomeprazole   | 40 mg bid   | 14d      |
|                    |         |              |                                |                             |                               |                           |                   |           |                                                                 |                                                                 | tetracycline   | 500 mg qid  | 14d      |
|                    |         |              |                                | 14d bismuth                 | 100                           | 41.5 (18-68)              | 59/41             | 6 weeks   | UBT, histological examination                                   | <sup>14</sup> C-UBT                                             | amoxicillin    | 1000 mg bid | 14d      |
|                    |         |              |                                |                             |                               |                           |                   |           |                                                                 |                                                                 | metronidazole  | 500 mg tid  | 14d      |
|                    |         |              |                                | 14d bismuth                 | 100                           | 41.5 (18-68)              | 59/41             | 6 weeks   | UBT, histological examination                                   | <sup>14</sup> C-UBT                                             | bismuth        | 300 mg qid  | 14d      |



| Authors               | Country       | Jadad score | Study design                              | Patients' characteristic |                 |                               |                   |            |                                                                           | Treatment                   |                       |             |          |
|-----------------------|---------------|-------------|-------------------------------------------|--------------------------|-----------------|-------------------------------|-------------------|------------|---------------------------------------------------------------------------|-----------------------------|-----------------------|-------------|----------|
|                       |               |             |                                           | Treatment                | No. of patients | Age(range) or $\pm$ (SD) year | Man/Women (n1/n2) | Follow-up  | Confirmation of <i>H. pylori</i> infection                                | Confirmation of Eradication | Intervention          | Dosage      | Duration |
| Uygun A<br>2007 (121) | Turkey        | 3           | single-blind, RCT, parallel arm           | 14d bismuth              | 120             | 41.1 (19-70)                  | 69/51             | 6 weeks    | <sup>14</sup> C-UBT, histological examination                             | <sup>14</sup> C-UBT         | esomeprazole          | 40 mg bid   | 14d      |
|                       |               |             |                                           |                          |                 |                               |                   |            |                                                                           |                             | tetracycline          | 500 mg qid  | 14d      |
|                       |               |             |                                           |                          |                 |                               |                   |            |                                                                           |                             | amoxicillin           | 1000 mg bid | 14d      |
|                       |               |             |                                           |                          |                 |                               |                   |            |                                                                           |                             | bismuth subsalicylate | 300 mg qid  | 14d      |
|                       |               |             |                                           | 14d triple               | 120             | 40.7 (19-70)                  | 73/47             | 6 weeks    | <sup>14</sup> C-UBT, histological examination                             | <sup>14</sup> C-UBT         | lansoprazole          | 30 mg bid   | 14d      |
|                       |               |             |                                           |                          |                 |                               |                   |            |                                                                           |                             | amoxicillin           | 1000 mg bid | 14d      |
|                       |               |             |                                           |                          |                 |                               |                   |            |                                                                           |                             | clarithromycin        | 500 mg bid  | 14d      |
|                       |               |             |                                           |                          |                 |                               |                   |            |                                                                           |                             | metronidazole         | 500 mg tid  | 14d      |
| Vaira D<br>2007 (122) | Italy         | 5           | RCT, double-blind                         | 10d sequential           | 150             | 48.6 $\pm$ 14                 | 59/91             | 4-8 weeks  | <sup>13</sup> C-UBT, rapid urease test, histological examination, culture | <sup>13</sup> C-UBT         | pantoprazole          | 40 mg bid   | 1-5d     |
|                       |               |             |                                           |                          |                 |                               |                   |            |                                                                           |                             | amoxicillin           | 1000 mg bid | 1-5d     |
|                       |               |             |                                           |                          |                 |                               |                   |            |                                                                           |                             | pantoprazole          | 40 mg bid   | 6-10d    |
|                       |               |             |                                           | 10d triple               | 150             | 49.2 $\pm$ 15                 | 51/99             | 4-8 weeks  | <sup>13</sup> C-UBT, rapid urease test, histological examination, culture | <sup>13</sup> C-UBT         | clarithromycin        | 500 mg bid  | 6-10d    |
|                       |               |             |                                           |                          |                 |                               |                   |            |                                                                           |                             | tinidazole            | 500 mg bid  | 6-10d    |
|                       |               |             |                                           |                          |                 |                               |                   |            |                                                                           |                             | pantoprazole          | 40 mg bid   | 10d      |
| Vakil N<br>2004 (123) | United States | 5           | multi-center, double-blind, parallel, RCT | 7d triple                | 200             | 46.9 $\pm$ 0.95               | 94/106            | 6-10 weeks | <sup>13</sup> C-UBT, serological testing, rapid urease test, culture      | <sup>13</sup> C-UBT         | rabeprazole           | 20 mg bid   | 7d       |
|                       |               |             |                                           |                          |                 |                               |                   |            |                                                                           |                             | amoxicillin           | 1000 mg bid | 7d       |
|                       |               |             |                                           |                          |                 |                               |                   |            |                                                                           |                             | clarithromycin        | 500 mg bid  | 7d       |

| Authors                | Country | Jadad score | Study design | Patients' characteristic |                 |                               |                   |                 |                                                                           |                                                                              | Treatment                             |            |            |           |
|------------------------|---------|-------------|--------------|--------------------------|-----------------|-------------------------------|-------------------|-----------------|---------------------------------------------------------------------------|------------------------------------------------------------------------------|---------------------------------------|------------|------------|-----------|
|                        |         |             |              | Treatment                | No. of patients | Age(range) or $\pm$ (SD) year | Man/Women (n1/n2) | Follow-up       | Confirmation of <i>H. pylori</i> infection                                | Confirmation of Eradication                                                  | Intervention                          | Dosage     | Duration   |           |
| Valooran GJ 2011 (124) | India   | 3           | RCT          | 10d triple               | 202             | 48.2 $\pm$ 0.92               | 96/106            | 6-10 weeks      | <sup>13</sup> C-UBT, serological testing, rapid urease test, culture      | <sup>13</sup> C-UBT                                                          | rabeprazole                           | 20 mg bid  | 10d        |           |
|                        |         |             |              |                          |                 |                               |                   | amoxicillin     |                                                                           |                                                                              | 1000 mg bid                           | 10d        |            |           |
|                        |         |             |              |                          |                 |                               |                   | clarithromycin  |                                                                           |                                                                              | 500 mg bid                            | 10d        |            |           |
|                        |         |             |              |                          |                 |                               |                   |                 |                                                                           |                                                                              |                                       |            |            |           |
| Wang PW 2008 (125)     | China   | 2           | RCT          | 10d triple               | 36              | 42 $\pm$ 13.8                 | 34/2              | 2 months        | urease testing, histological examination                                  | endoscopy                                                                    | omeprazole                            | 20 mg bid  | 10d        |           |
|                        |         |             |              |                          |                 |                               |                   | clarithromycin  |                                                                           |                                                                              | 500 mg bid                            | 10d        |            |           |
|                        |         |             |              |                          |                 |                               |                   | amoxicillin     |                                                                           |                                                                              | 1000 mg bid                           | 10d        |            |           |
|                        |         |             |              | 10d sequential           | 37              | 45 $\pm$ 12.7                 | 35/2              | 2 months        |                                                                           |                                                                              | urease test, histological examination | endoscopy  | omeprazole | 20 mg bid |
|                        |         |             |              | amoxicillin              | 1000 mg bid     | 1-5d                          | omeprazole        | 20 mg bid       | 6-10d                                                                     | clarithromycin                                                               | 500 mg bid                            | 6-10d      |            |           |
|                        |         |             |              | amoxicillin              | 1000 mg bid     | 6-10d                         |                   |                 |                                                                           |                                                                              |                                       |            |            |           |
| Wong BC 2001 (126)     | China   | 3           | RCT          | 7d                       | 20              | 48.6 $\pm$ 10.2               | 11/9              | 35 days         | rapid urease test, histological examination, <sup>13</sup> C-UBT          | <sup>13</sup> C-UBT                                                          | ranitidine                            | 200 mg bid | 7d         |           |
|                        |         |             |              |                          |                 |                               |                   | bismuth citrate |                                                                           |                                                                              |                                       |            |            |           |
|                        |         |             |              |                          |                 |                               |                   | clarithromycin  |                                                                           |                                                                              | 500 mg bid                            | 7d         |            |           |
|                        |         |             |              |                          |                 |                               |                   | amoxicillin     |                                                                           |                                                                              | 1000 mg bid                           | 7d         |            |           |
|                        |         |             |              | 7d triple                | 20              | 50.5 $\pm$ 9.3                | 10/10             | 35 days         | rapid urease test, histological examination, <sup>13</sup> C-UBT          | <sup>13</sup> C-UBT                                                          | esomeprazole                          | 20 mg bid  | 7d         |           |
|                        |         |             |              |                          |                 |                               |                   |                 |                                                                           | clarithromycin                                                               | 500 mg bid                            | 7d         |            |           |
|                        |         |             |              |                          |                 |                               |                   |                 |                                                                           | amoxicillin                                                                  | 1000 mg bid                           | 7d         |            |           |
| Wong BC 2001 (126)     | China   | 3           | RCT          | 7d                       | 90              | 49.8 $\pm$ 14.5               | 29/61             | 6 weeks         | culture, rapid urease test, histological examination, <sup>13</sup> C-UBT | culture, rapid urease testing, histological examination, <sup>13</sup> C-UBT | ranitidine                            | 400 mg bid | 7d         |           |
|                        |         |             |              |                          |                 |                               |                   | bismuth citrate |                                                                           |                                                                              |                                       |            |            |           |
|                        |         |             |              |                          |                 |                               |                   | clarithromycin  |                                                                           |                                                                              | 250 mg bid                            | 7d         |            |           |
|                        |         |             |              |                          |                 |                               |                   | metronidazole   |                                                                           |                                                                              | 400 mg bid                            | 7d         |            |           |
|                        |         |             |              | 7d triple                | 90              | 45.9 $\pm$ 14.4               | 38/52             | 6 weeks         | culture, rapid                                                            | culture, rapid                                                               | omeprazole                            | 20 mg bid  | 7d         |           |

| Authors             | Country     | Jadad score | Study design | Patients' characteristic |                 |                               |                   |           |                                                                  |                                                                           | Treatment      |             |          |
|---------------------|-------------|-------------|--------------|--------------------------|-----------------|-------------------------------|-------------------|-----------|------------------------------------------------------------------|---------------------------------------------------------------------------|----------------|-------------|----------|
|                     |             |             |              | Treatment                | No. of patients | Age(range) or $\pm$ (SD) year | Man/Women (n1/n2) | Follow-up | Confirmation of <i>H. pylori</i> infection                       | Confirmation of Eradication                                               | Intervention   | Dosage      | Duration |
| Wu DC<br>2010 (127) | Taiwan      | 3           | RCT          | 10d sequential           | 117             | 51.7 $\pm$ 12                 | 61/56             | 8 weeks   | urease test, histological examination, <sup>13</sup> C-UBT       | urease testing, histological examination, <sup>13</sup> C-UBT             | clarithromycin | 250 mg bid  | 7d       |
|                     |             |             |              |                          |                 |                               |                   |           |                                                                  |                                                                           | metronidazole  | 400 mg bid  | 7d       |
|                     |             |             |              |                          |                 |                               |                   |           |                                                                  |                                                                           | esomeprazole   | 40 mg bid   | 1-5d     |
|                     |             |             |              | 10d concomitant          | 115             | 51.8 $\pm$ 11                 | 60/55             | 8 weeks   | culture, rapid urease test, histological examination             | culture, rapid urease test, <sup>13</sup> C-UBT, histological examination | amoxicillin    | 1000 mg bid | 1-5d     |
|                     |             |             |              |                          |                 |                               |                   |           |                                                                  |                                                                           | clarithromycin | 500 mg bid  | 6-10d    |
|                     |             |             |              |                          |                 |                               |                   |           |                                                                  |                                                                           | metronidazole  | 500 mg bid  | 6-10d    |
| esomeprazole        | 40 mg bid   | 6-10d       |              |                          |                 |                               |                   |           |                                                                  |                                                                           |                |             |          |
| Wu GL<br>2011 (128) | China       | 3           | RCT          | 10d sequential           | 52              | 49.85 $\pm$ 17.15             | 20/32             | 4 weeks   | histological examination, rapid urease test, <sup>13</sup> C-UBT | histological examination, rapid urease test, <sup>13</sup> C-UBT          | esomeprazole   | 20 mg bid   | 1-5d     |
|                     |             |             |              |                          |                 |                               |                   |           |                                                                  |                                                                           | amoxicillin    | 1000 mg bid | 1-5d     |
|                     |             |             |              |                          |                 |                               |                   |           |                                                                  |                                                                           | esomeprazole   | 20 mg bid   | 6-10d    |
|                     |             |             |              | 14d triple               | 51              | 48.53 $\pm$ 15.55             | 24/27             | 4 weeks   | histological examination, rapid urease test, <sup>13</sup> C-UBT | histological examination, rapid urease test, <sup>13</sup> C-UBT          | clarithromycin | 500 mg bid  | 6-10d    |
|                     |             |             |              |                          |                 |                               |                   |           |                                                                  |                                                                           | tinidazole     | 500 mg bid  | 6-10d    |
|                     |             |             |              |                          |                 |                               |                   |           |                                                                  |                                                                           | esomeprazole   | 20 mg bid   | 14d      |
| clarithromycin      | 500 mg bid  | 14d         |              |                          |                 |                               |                   |           |                                                                  |                                                                           |                |             |          |
| amoxicillin         | 1000 mg bid | 14d         |              |                          |                 |                               |                   |           |                                                                  |                                                                           |                |             |          |
| Xu MH               | China       | 2           | RCT          | 7d bismuth               | 67              | 43.2 $\pm$ 10.7               | 37/30             | 4 weeks   | <sup>13</sup> C-UBT,                                             | <sup>14</sup> C-UBT                                                       | esomeprazole   | 20 mg bid   | 7d       |

| Authors               | Country | Jadad score | Study design | Patients' characteristic |                 |                               |                   |           |                                                      | Treatment                   |                |                |            |                 |       |         |                                                                                                                                        |                     |                   |             |    |
|-----------------------|---------|-------------|--------------|--------------------------|-----------------|-------------------------------|-------------------|-----------|------------------------------------------------------|-----------------------------|----------------|----------------|------------|-----------------|-------|---------|----------------------------------------------------------------------------------------------------------------------------------------|---------------------|-------------------|-------------|----|
|                       |         |             |              | Treatment                | No. of patients | Age(range) or $\pm$ (SD) year | Man/Women (n1/n2) | Follow-up | Confirmation of <i>H. pylori</i> infection           | Confirmation of Eradication | Intervention   | Dosage         | Duration   |                 |       |         |                                                                                                                                        |                     |                   |             |    |
| 2011 (129)            |         |             |              |                          |                 |                               |                   |           |                                                      |                             |                | clarithromycin | 500 mg bid | 7d              |       |         |                                                                                                                                        |                     |                   |             |    |
|                       |         |             |              |                          |                 |                               |                   |           |                                                      |                             |                | 7d triple      | 69         | 43.3 $\pm$ 11.7 | 39/30 | 4 weeks | <sup>14</sup> C-UBT, <i>H. pylori</i> SA test, serum <i>H. pylori</i> antibodies, culture, rapid urease test, histological examination | <sup>14</sup> C-UBT | esomeprazole      | 20 mg bid   | 7d |
|                       |         |             |              |                          |                 |                               |                   |           |                                                      |                             |                |                |            |                 |       |         |                                                                                                                                        |                     | clarithromycin    | 500 mg bid  | 7d |
|                       |         |             |              |                          |                 |                               |                   |           |                                                      |                             |                |                |            |                 |       |         |                                                                                                                                        |                     | amoxicillin       | 1000 mg bid | 7d |
|                       |         |             |              |                          |                 |                               |                   |           |                                                      |                             |                |                |            |                 |       |         |                                                                                                                                        |                     | bismuth           | 220 mg bid  | 7d |
|                       |         |             |              |                          |                 |                               |                   |           |                                                      |                             |                |                |            |                 |       |         |                                                                                                                                        |                     | potassium citrate |             |    |
| Yanai A<br>2012 (130) | Japan   | 2           | RCT          | 7d concomitant           | 59              | 63 $\pm$ 8.7                  | 48/11             | 3 months  | rapid urease test, culture, histological examination | <sup>13</sup> C-UBT         | esomeprazole   | 30 mg bid      | 7d         |                 |       |         |                                                                                                                                        |                     |                   |             |    |
|                       |         |             |              |                          |                 |                               |                   |           |                                                      |                             | amoxicillin    | 750 mg bid     | 7d         |                 |       |         |                                                                                                                                        |                     |                   |             |    |
|                       |         |             |              |                          |                 |                               |                   |           |                                                      |                             | clarithromycin | 200 mg bid     | 7d         |                 |       |         |                                                                                                                                        |                     |                   |             |    |
|                       |         |             |              |                          |                 |                               |                   |           |                                                      |                             | metronidazole  | 250 mg bid     | 7d         |                 |       |         |                                                                                                                                        |                     |                   |             |    |
| Yaşar B<br>2010 (131) | Turkey  | 2           | RCT          | 14d probiotic            | 38              | 38.32 $\pm$ 10.66             | 11/27             | 4 weeks   | histopathological examination                        | <sup>13</sup> C-UBT         | pantoprazole   | 40 mg bid      | 14d        |                 |       |         |                                                                                                                                        |                     |                   |             |    |
|                       |         |             |              |                          |                 |                               |                   |           |                                                      |                             | amoxicillin    | 1000 mg bid    | 14d        |                 |       |         |                                                                                                                                        |                     |                   |             |    |
|                       |         |             |              |                          |                 |                               |                   |           |                                                      |                             | clarithromycin | 500 mg bid     | 14d        |                 |       |         |                                                                                                                                        |                     |                   |             |    |

| Authors              | Country | Jadad score | Study design                      | Patients' characteristic |                 |                               |                   |           |                                                                  | Treatment                                     |                                                                                                  |             |          |
|----------------------|---------|-------------|-----------------------------------|--------------------------|-----------------|-------------------------------|-------------------|-----------|------------------------------------------------------------------|-----------------------------------------------|--------------------------------------------------------------------------------------------------|-------------|----------|
|                      |         |             |                                   | Treatment                | No. of patients | Age(range) or $\pm$ (SD) year | Man/Women (n1/n2) | Follow-up | Confirmation of <i>H. pylori</i> infection                       | Confirmation of Eradication                   | Intervention                                                                                     | Dosage      | Duration |
|                      |         |             |                                   |                          |                 |                               |                   |           |                                                                  |                                               | probiotic-containing yogurt (Bifidobacterium DN-173 010-10 <sup>10</sup> colony forming units/g) | 125 ml qd   | 14d      |
|                      |         |             |                                   | 14d triple               | 38              | 36.95 $\pm$ 8.62              | 14/24             | 4 weeks   | histopathological examination                                    | <sup>13</sup> C-UBT                           | pantoprazole                                                                                     | 40 mg bid   | 14d      |
|                      |         |             |                                   |                          |                 |                               |                   |           |                                                                  |                                               | amoxicillin                                                                                      | 1000 mg bid | 14d      |
|                      |         |             |                                   |                          |                 |                               |                   |           |                                                                  |                                               | clarithromycin                                                                                   | 500 mg bid  | 14d      |
| Zagari RM 2007 (132) | Italy   | 5           | double-blind, parallel-group, RCT | 7d triple                | 301             | 45.5 $\pm$ 11.8               | 206/95            | 4 weeks   | rapid urease test, <sup>13</sup> C-UBT, histological examination | <sup>13</sup> C-UBT, histological examination | omeprazole                                                                                       | 20 mg bid   | 7d       |
|                      |         |             |                                   |                          |                 |                               |                   |           |                                                                  |                                               | amoxicillin                                                                                      | 1000 mg bid | 7d       |
|                      |         |             |                                   |                          |                 |                               |                   |           |                                                                  |                                               | clarithromycin                                                                                   | 500 mg bid  | 7d       |
|                      |         |             |                                   | 14d triple               | 302             | 46.7 $\pm$ 11.6               | 216/86            | 4 weeks   | rapid urease test, <sup>13</sup> C-UBT, histological examination | <sup>13</sup> C-UBT, histological examination | omeprazole                                                                                       | 20 mg bid   | 14d      |
|                      |         |             |                                   |                          |                 |                               |                   |           |                                                                  |                                               | amoxicillin                                                                                      | 1000 mg bid | 14d      |
|                      |         |             |                                   |                          |                 |                               |                   |           |                                                                  |                                               | clarithromycin                                                                                   | 500 mg bid  | 14d      |
| Zhang XM 2010 (133)  | China   | 2           | RCT                               | 7d levofloxacin          | 58              |                               |                   | 4 weeks   | rapid urease test, <sup>13</sup> C-UBT, histological examination | <sup>13</sup> C-UBT                           | levofloxacin                                                                                     | 200 mg bid  | 7d       |
|                      |         |             |                                   |                          |                 |                               |                   |           |                                                                  |                                               | clarithromycin                                                                                   | 500 mg bid  | 7d       |
|                      |         |             |                                   |                          |                 |                               |                   |           |                                                                  |                                               | rabeprazole                                                                                      | 10 mg bid   | 7d       |
|                      |         |             |                                   | 7d bismuth               | 46              | NA                            | NA                | 4 weeks   | rapid urease test, <sup>13</sup> C-UBT, histological examination | <sup>13</sup> C-UBT                           | levofloxacin                                                                                     | 200 mg bid  | 7d       |
|                      |         |             |                                   |                          |                 |                               |                   |           |                                                                  |                                               | clarithromycin                                                                                   | 500 mg bid  | 7d       |
|                      |         |             |                                   |                          |                 |                               |                   |           |                                                                  |                                               | rabeprazole                                                                                      | 10 mg bid   | 7d       |
|                      |         |             |                                   |                          |                 |                               |                   |           |                                                                  |                                               | colloidal bismuth                                                                                | 200 mg bid  | 7d       |
|                      |         |             |                                   | 7d bismuth               | 41              |                               |                   | 4 weeks   | rapid urease test, <sup>13</sup> C-UBT,                          | <sup>13</sup> C-UBT                           | rabeprazole                                                                                      | 10 mg bid   | 7d       |
|                      |         |             |                                   |                          |                 |                               |                   |           |                                                                  |                                               | clarithromycin                                                                                   | 500 mg bid  | 7d       |

| Authors               | Country | Jadad score | Study design                                  | Patients' characteristic |                 |                           |                   |           |                                               |                             | Treatment                    |             |          |
|-----------------------|---------|-------------|-----------------------------------------------|--------------------------|-----------------|---------------------------|-------------------|-----------|-----------------------------------------------|-----------------------------|------------------------------|-------------|----------|
|                       |         |             |                                               | Treatment                | No. of patients | Age(range) or ± (SD) year | Man/Women (n1/n2) | Follow-up | Confirmation of <i>H. pylori</i> infection    | Confirmation of Eradication | Intervention                 | Dosage      | Duration |
| Zhao QX<br>2009 (134) | China   | 2           | RCT                                           | 10d sequential           | 62              | 35(18-69)                 | 35/27             | 4 weeks   | histological examination                      | <sup>13</sup> C-UBT         | tinidazole                   | 400 mg bid  | 7d       |
|                       |         |             |                                               |                          |                 |                           |                   |           |                                               |                             | colloidal bismuth            | 200 mg bid  | 7d       |
|                       |         |             |                                               |                          |                 |                           |                   |           |                                               |                             | pantoprazole                 | 40 mg bid   | 1-5d     |
|                       |         |             |                                               | 7d triple                | 58              | 37(19-68)                 | 33/25             | 4 weeks   | histological examination                      | <sup>13</sup> C-UBT         | amoxicillin                  | 1000 mg bid | 1-5d     |
|                       |         |             |                                               |                          |                 |                           |                   |           |                                               |                             | pantoprazole                 | 40 mg bid   | 6-10d    |
|                       |         |             |                                               |                          |                 |                           |                   |           |                                               |                             | clarithromycin               | 500 mg bid  | 6-10d    |
| Zheng Q<br>2010 (135) | China   | 2           | single-center, open, parallel controlled, RCT | 7d triple                | 85              | 43.03±13.46               | 30/55             | 4 weeks   | <sup>13</sup> C-UBT, histological examination | <sup>13</sup> C-UBT         | tinidazole                   | 500 mg bid  | 6-10d    |
|                       |         |             |                                               |                          |                 |                           |                   |           |                                               |                             | pantoprazole                 | 40 mg bid   | 7d       |
|                       |         |             |                                               |                          |                 |                           |                   |           |                                               |                             | clarithromycin               | 500 mg bid  | 7d       |
|                       |         |             |                                               | 10d bismuth              | 85              | 41.23±12.96               | 46/39             | 4 weeks   | <sup>13</sup> C-UBT, histological examination | <sup>13</sup> C-UBT         | amoxicillin                  | 1000mg bid  | 7d       |
|                       |         |             |                                               |                          |                 |                           |                   |           |                                               |                             | pantoprazole                 | 40 mg bid   | 7d       |
|                       |         |             |                                               |                          |                 |                           |                   |           |                                               |                             | colloidal bismuth subcitrate | 220 mg bid  | 10d      |
| Zheng Q<br>2009 (136) | China   | 2           | RCT, single-center, open, parallel controlled | 7d triple                | 45              | 18-75                     | 74/59             | 4 weeks   | rapid urease test, histological examination   | <sup>13</sup> C-UBT         | metronidazole                | 400 mg tid  | 10d      |
|                       |         |             |                                               |                          |                 |                           |                   |           |                                               |                             | pantoprazole                 | 40 mg bid   | 7d       |
|                       |         |             |                                               |                          |                 |                           |                   |           |                                               |                             | amoxicillin                  | 1000 mg bid | 7d       |
|                       |         |             |                                               | 10d bismuth              | 45              |                           |                   | 4 weeks   | rapid urease test,                            | <sup>13</sup> C-UBT         | clarithromycin               | 500 mg bid  | 7d       |
|                       |         |             |                                               |                          |                 |                           |                   |           |                                               |                             | pantoprazole                 | 40 mg bid   | 10d      |
|                       |         |             |                                               |                          |                 |                           |                   |           |                                               |                             |                              |             |          |



| Authors                  | Country | Jadad score     | Study design | Patients' characteristic |                 |                               |                                                                            |                |                                            |                             | Treatment                                        |                   |             |     |
|--------------------------|---------|-----------------|--------------|--------------------------|-----------------|-------------------------------|----------------------------------------------------------------------------|----------------|--------------------------------------------|-----------------------------|--------------------------------------------------|-------------------|-------------|-----|
|                          |         |                 |              | Treatment                | No. of patients | Age(range) or $\pm$ (SD) year | Man/Women (n1/n2)                                                          | Follow-up      | Confirmation of <i>H. pylori</i> infection | Confirmation of Eradication | Intervention                                     | Dosage            | Duration    |     |
| Ziemniak W<br>2006 (139) | Poland  | 1               | RCT          | 10d triple               | 192             | 43.7 $\pm$ 10.3               | 78/114                                                                     | 6 weeks        | endoscopy, UBT                             | <sup>13</sup> C-UBT         | <i>pylori</i> antibody, histological examination | amoxicillin       | 1000 mg bid | 10d |
|                          |         |                 |              |                          |                 |                               |                                                                            |                |                                            |                             | PPI                                              | standard dose bid | 10d         |     |
|                          |         |                 |              |                          |                 |                               |                                                                            |                |                                            |                             | clarithromycin                                   | 500 mg bid        | 10d         |     |
|                          |         |                 |              | 10d bismuth              | 241             | 45.1 $\pm$ 12.3               | 102/139                                                                    | 6 weeks        | endoscopy, UBT                             | <sup>13</sup> C-UBT         | amoxicillin                                      | 1000 mg bid       | 10d         |     |
|                          |         |                 |              |                          |                 |                               |                                                                            |                |                                            |                             | PPI                                              | standard dose bid | 10d         |     |
|                          |         |                 |              |                          |                 |                               |                                                                            |                |                                            |                             | tetracycline                                     | 500 mg qid        | 10d         |     |
| 10d probiotic            | 53      | 44.4 $\pm$ 13.3 | 14/39        | 6 weeks                  | endoscopy, UBT  | <sup>13</sup> C-UBT           | tinidazole                                                                 | 500 mg bid     | 10d                                        |                             |                                                  |                   |             |     |
|                          |         |                 |              |                          |                 |                               | bismuth salt                                                               | 120 mg qid     | 10d                                        |                             |                                                  |                   |             |     |
|                          |         |                 |              |                          |                 |                               | Lacidofil containing Lactobacillus acidophilus and Lactobacillus rhamnosus | 2 capsules bid | 10d                                        |                             |                                                  |                   |             |     |
| Zojaji H<br>2013 (140)   | Iran    | 2               | RCT          | 14d probiotic            | 80              | 47.1 $\pm$ 11.4               | 66/94                                                                      | 8 weeks        | biopsy                                     | <sup>13</sup> C-UBT         | PPI                                              | standard dose bid | 10d         |     |
|                          |         |                 |              |                          |                 |                               |                                                                            |                |                                            |                             | clarithromycin                                   | 500 mg bid        | 10d         |     |
|                          |         |                 |              |                          |                 |                               |                                                                            |                |                                            |                             | amoxicillin                                      | 1000 mg bid       | 10d         |     |
|                          |         |                 |              |                          |                 |                               |                                                                            |                |                                            |                             | amoxicillin                                      | 1000 mg bid       | 14d         |     |
|                          |         |                 |              |                          |                 |                               |                                                                            |                |                                            |                             | clarithromycin                                   | 500 mg bid        | 14d         |     |
|                          |         |                 |              |                          |                 |                               |                                                                            |                |                                            |                             | omeprazole                                       | 20 mg bid         | 14d         |     |



| Authors            | Country | Jadad score | Study design                  | Patients' characteristic |                 |                               |                   |           |                                             |                                             | Treatment    |                         |             |       |
|--------------------|---------|-------------|-------------------------------|--------------------------|-----------------|-------------------------------|-------------------|-----------|---------------------------------------------|---------------------------------------------|--------------|-------------------------|-------------|-------|
|                    |         |             |                               | Treatment                | No. of patients | Age(range) or $\pm$ (SD) year | Man/Women (n1/n2) | Follow-up | Confirmation of <i>H. pylori</i> infection  | Confirmation of Eradication                 | Intervention | Dosage                  | Duration    |       |
|                    |         |             |                               |                          |                 |                               |                   |           |                                             |                                             |              | saccharomyces boulardii | 250 mg bid  | 14d   |
|                    |         |             |                               | 14d triple               | 80              |                               |                   | 8 weeks   | biopsy                                      | <sup>13</sup> C-UBT                         |              | amoxicillin             | 1000 mg bid | 14d   |
|                    |         |             |                               |                          |                 |                               |                   |           |                                             |                                             |              | clarithromycin          | 500 mg bid  | 14d   |
|                    |         |             |                               |                          |                 |                               |                   |           |                                             |                                             |              | omeprazole              | 20 mg bid   | 14d   |
| Zullo A 2005 (141) | Italy   | 3           | open-label, three-center, RCT | 10d sequential           | 89              | 69 (65-83)                    | 50/39             | 4-6 weeks | histological examination, rapid urease test | histological examination, rapid urease test |              | rabeprazole             | 20 mg bid   | 1-5d  |
|                    |         |             |                               |                          |                 |                               |                   |           |                                             |                                             |              | amoxicillin             | 1000 mg bid | 1-5d  |
|                    |         |             |                               |                          |                 |                               |                   |           |                                             |                                             |              | rabeprazole             | 20 mg bid   | 6-10d |
|                    |         |             |                               |                          |                 |                               |                   |           |                                             |                                             |              | clarithromycin          | 500 mg bid  | 6-10d |
|                    |         |             |                               |                          |                 |                               |                   |           |                                             |                                             |              | tinidazole              | 500 mg bid  | 6-10d |
|                    |         |             |                               | 7d triple                | 90              | 70 (65-78)                    | 56/34             | 4-6 weeks | histological examination, rapid urease test | histological examination, rapid urease test |              | rabeprazole             | 20 mg bid   | 7d    |
|                    |         |             |                               |                          |                 |                               |                   |           |                                             |                                             |              | clarithromycin          | 500 mg bid  | 7d    |
|                    |         |             |                               |                          |                 |                               |                   |           |                                             |                                             |              | amoxicillin             | 1000 mg bid | 7d    |
| Zullo A 2013 (142) | Italy   | 3           | multi-center, open-label, RCT | 10d sequential           | 90              | 49.4 $\pm$ 14.3               | 35/55             | 6 weeks   | histological examination, rapid urease test | <sup>13</sup> C-UBT                         |              | omeprazole              | 20 mg bid   | 1-5d  |
|                    |         |             |                               |                          |                 |                               |                   |           |                                             |                                             |              | amoxicillin             | 1000 mg bid | 1-5d  |
|                    |         |             |                               |                          |                 |                               |                   |           |                                             |                                             |              | omeprazole              | 20 mg bid   | 6-10d |
|                    |         |             |                               |                          |                 |                               |                   |           |                                             |                                             |              | clarithromycin          | 500 mg bid  | 6-10d |
|                    |         |             |                               |                          |                 |                               |                   |           |                                             |                                             |              | tinidazole              | 500 mg bid  | 6-10d |
|                    |         |             |                               | 14d hybrid               | 90              | 49.9 $\pm$ 13.8               | 38/52             | 6 weeks   | histological examination, rapid urease test | <sup>13</sup> C-UBT                         |              | omeprazole              | 20 mg bid   | 1-14d |
|                    |         |             |                               |                          |                 |                               |                   |           |                                             |                                             |              | amoxicillin             | 1000 mg bid | 1-14d |
|                    |         |             |                               |                          |                 |                               |                   |           |                                             |                                             |              | clarithromycin          | 500 mg bid  | 8-14d |
|                    |         |             |                               |                          |                 |                               |                   |           |                                             |                                             |              | tinidazole              | 500 mg bid  | 8-14d |
| Zullo A 2003 (143) | Italy   | 3           | open-label, RCT               | 10d sequential           | 522             | 52 $\pm$ 13                   | 258/264           | 6 weeks   | rapid urease test, histological             | rapid urease test, histological             |              | rabeprazole             | 40 mg qd    | 1-5d  |
|                    |         |             |                               |                          |                 |                               |                   |           |                                             |                                             |              | amoxicillin             | 1000 mg bid | 1-5d  |

| Authors | Country | Jadad score | Study design | Patients' characteristic |                 |                               |                   |           |                                                                        | Treatment                                                              |                                              |                                       |                         |
|---------|---------|-------------|--------------|--------------------------|-----------------|-------------------------------|-------------------|-----------|------------------------------------------------------------------------|------------------------------------------------------------------------|----------------------------------------------|---------------------------------------|-------------------------|
|         |         |             |              | Treatment                | No. of patients | Age(range) or $\pm$ (SD) year | Man/Women (n1/n2) | Follow-up | Confirmation of <i>H. pylori</i> infection                             | Confirmation of Eradication                                            | Intervention                                 | Dosage                                | Duration                |
|         |         |             |              |                          |                 |                               |                   |           | examination, <sup>13</sup> C-UBT                                       | examination, <sup>13</sup> C-UBT                                       | rabeprazole<br>clarithromycin<br>tinidazole  | 20 mg bid<br>500 mg bid<br>500 mg bid | 6-10d<br>6-10d<br>6-10d |
|         |         |             |              | 7d triple                | 527             | 53 $\pm$ 13.3                 | 287/240           | 6 weeks   | rapid urease test,<br>histological examination,<br><sup>13</sup> C-UBT | rapid urease test,<br>histological examination,<br><sup>13</sup> C-UBT | rabeprazole<br>clarithromycin<br>amoxicillin | 20 mg bid<br>500mg bid<br>1000 mg bid | 7d<br>7d<br>7d          |

RCT=randomized controlled trials; UBT=urea breath test; PPI=proton pump inhibitor; NA=Not applicable. See Table 1 for key of intervention regimen names and descriptions;
