# Supplementary material
Source: PubMed Central journal article supplement (PMC4784868)
Supplement: baol025359.ww3_default.pdf [file baol025359.ww3_default.pdf]

### Web appendix 3: Quality assessment results

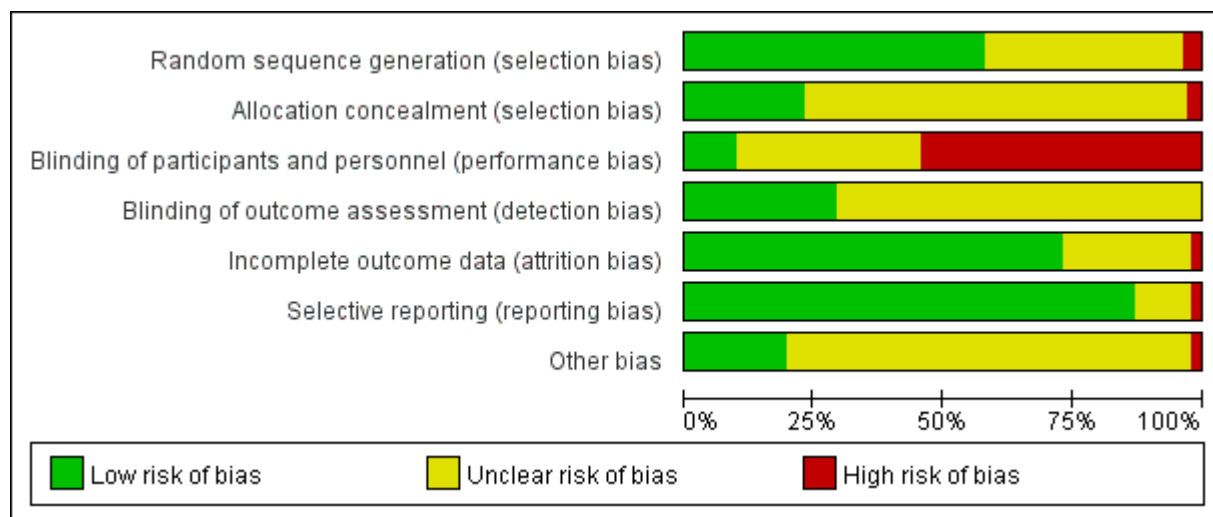

Fig S3.1 Graph of risk of bias assessments for RCTs of eradication therapies for *H. pylori*

Table S3.1 Summary of methodological quality of included studies

| Study                | Random sequence generation | Allocation concealment | Blinding of participants and personnel | Blinding of outcome assessment | Incomplete outcome data | Selective reporting | Other sources of bias |
|----------------------|----------------------------|------------------------|----------------------------------------|--------------------------------|-------------------------|---------------------|-----------------------|
| Alkim H 2011 (1)     | low                        | unclear                | unclear                                | low                            | low                     | low                 | unclear               |
| Aminian K 2010 (2)   | low                        | unclear                | unclear                                | unclear                        | low                     | low                 | unclear               |
| Assem M 2010 (3)     | low                        | unclear                | unclear                                | unclear                        | unclear                 | unclear             | unclear               |
| Avşar E 2013 (4)     | low                        | unclear                | unclear                                | unclear                        | unclear                 | low                 | unclear               |
| Aydin A 2007 (5)     | unclear                    | unclear                | unclear                                | unclear                        | unclear                 | low                 | low                   |
| Basu PP 2011 (6)     | low                        | low                    | high                                   | unclear                        | low                     | unclear             | unclear               |
| Bekar O 2011 (7)     | unclear                    | unclear                | low                                    | unclear                        | unclear                 | low                 | high                  |
| Bhasin DK 2000 (8)   | unclear                    | unclear                | unclear                                | unclear                        | low                     | low                 | unclear               |
| Bujanda L 2001 (9)   | low                        | unclear                | low                                    | unclear                        | low                     | low                 | unclear               |
| Bujanda L 2001 (10)  | unclear                    | unclear                | unclear                                | unclear                        | low                     | low                 | unclear               |
| Calvet X 2005 (11)   | low                        | low                    | high                                   | low                            | unclear                 | low                 | unclear               |
| Calvet X 2002 (12)   | unclear                    | low                    | unclear                                | unclear                        | unclear                 | low                 | low                   |
| Canducci F 2000 (13) | unclear                    | low                    | high                                   | unclear                        | low                     | low                 | unclear               |
| Catalano F 2000 (14) | low                        | unclear                | high                                   | low                            | low                     | low                 | unclear               |
| Catalano F 1998 (15) | unclear                    | unclear                | high                                   | low                            | low                     | low                 | unclear               |
| Chen LW 2010 (16)    | low                        | unclear                | high                                   | low                            | low                     | low                 | unclear               |
| Cheng H 2010 (17)    | unclear                    | unclear                | unclear                                | unclear                        | low                     | low                 | unclear               |
| Ching SS 2008 (18)   | low                        | unclear                | unclear                                | unclear                        | low                     | low                 | unclear               |
| Choi HS 2012 (19)    | low                        | unclear                | unclear                                | unclear                        | unclear                 | low                 | unclear               |
| Choi KH 2011 (20)    | low                        | low                    | low                                    | unclear                        | low                     | low                 | unclear               |
| Choi WH 2008 (21)    | unclear                    | unclear                | unclear                                | unclear                        | low                     | low                 | unclear               |
| Chung JW 2012 (22)   | low                        | unclear                | high                                   | unclear                        | low                     | low                 | low                   |

| <b>Study</b>                | <b>Random sequence generation</b> | <b>Allocation concealment</b> | <b>Blinding of participants and personnel</b> | <b>Blinding of outcome assessment</b> | <b>Incomplete outcome data</b> | <b>Selective reporting</b> | <b>Other sources of bias</b> |
|-----------------------------|-----------------------------------|-------------------------------|-----------------------------------------------|---------------------------------------|--------------------------------|----------------------------|------------------------------|
| Cindoruk M 2007 (23)        | low                               | unclear                       | low                                           | low                                   | low                            | low                        | unclear                      |
| Cuadrado-Lavín A 2012 (24)  | low                               | unclear                       | high                                          | unclear                               | low                            | low                        | unclear                      |
| Daghaghzadeh H 2007 (25)    | unclear                           | unclear                       | unclear                                       | unclear                               | low                            | low                        | unclear                      |
| Dal Bo' N 1998 (26)         | unclear                           | unclear                       | high                                          | low                                   | low                            | low                        | unclear                      |
| Dammann HG 2000 (27)        | unclear                           | unclear                       | low                                           | unclear                               | unclear                        | low                        | unclear                      |
| De Francesco V 2004 (28)    | low                               | unclear                       | high                                          | unclear                               | low                            | low                        | unclear                      |
| De Francesco V 2004 (29)    | low                               | unclear                       | unclear                                       | low                                   | low                            | high                       | unclear                      |
| Deguchi R 2012 (30)         | low                               | unclear                       | unclear                                       | low                                   | low                            | unclear                    | low                          |
| Du YQ 2012 (31)             | low                               | unclear                       | high                                          | unclear                               | low                            | low                        | unclear                      |
| Fakheri H 2012 (32)         | low                               | unclear                       | unclear                                       | low                                   | low                            | low                        | unclear                      |
| Fakheri HT 2011 (33)        | unclear                           | unclear                       | unclear                                       | unclear                               | low                            | low                        | unclear                      |
| Fallone CA 2013 (34)        | high                              | unclear                       | high                                          | low                                   | low                            | low                        | unclear                      |
| Farup PG 2002 (35)          | low                               | low                           | high                                          | unclear                               | unclear                        | low                        | unclear                      |
| Filipec Kanizaj T 2009 (36) | low                               | low                           | unclear                                       | low                                   | unclear                        | low                        | low                          |
| Francavilla R 2013 (37)     | low                               | low                           | low                                           | low                                   | low                            | low                        | unclear                      |
| Gao XZ 2010 (38)            | low                               | unclear                       | high                                          | unclear                               | low                            | low                        | unclear                      |
| Garza González E 2007 (39)  | unclear                           | unclear                       | unclear                                       | unclear                               | unclear                        | low                        | low                          |
| Georgopoulos S 2013 (40)    | low                               | unclear                       | high                                          | unclear                               | low                            | low                        | unclear                      |
| Gisbert JP 2000 (41)        | low                               | unclear                       | high                                          | low                                   | low                            | low                        | unclear                      |
| Gisbert JP 2005 (42)        | low                               | high                          | high                                          | low                                   | unclear                        | low                        | unclear                      |
| Gisbert JP 2001 (43)        | unclear                           | unclear                       | unclear                                       | low                                   | high                           | high                       | high                         |
| Gopal R 2013 (44)           | low                               | low                           | high                                          | unclear                               | unclear                        | low                        | unclear                      |
| Greenberg ER 2011 (45)      | low                               | low                           | high                                          | unclear                               | unclear                        | unclear                    | unclear                      |

| <b>Study</b>            | <b>Random sequence generation</b> | <b>Allocation concealment</b> | <b>Blinding of participants and personnel</b> | <b>Blinding of outcome assessment</b> | <b>Incomplete outcome data</b> | <b>Selective reporting</b> | <b>Other sources of bias</b> |
|-------------------------|-----------------------------------|-------------------------------|-----------------------------------------------|---------------------------------------|--------------------------------|----------------------------|------------------------------|
| Gumurdulu Y 2004 (46)   | unclear                           | unclear                       | unclear                                       | unclear                               | unclear                        | low                        | unclear                      |
| Hu FL 2012 (47)         | unclear                           | unclear                       | unclear                                       | unclear                               | low                            | low                        | unclear                      |
| Hu SQ 2009 (48)         | low                               | unclear                       | unclear                                       | unclear                               | low                            | low                        | unclear                      |
| Huang YK 2012 (49)      | low                               | unclear                       | high                                          | unclear                               | low                            | low                        | low                          |
| Hung IF 2009 (50)       | unclear                           | low                           | high                                          | unclear                               | low                            | low                        | unclear                      |
| Hurenkamp GJ 2000 (51)  | unclear                           | unclear                       | low                                           | low                                   | low                            | unclear                    | unclear                      |
| Iacopini F 2005 (52)    | low                               | unclear                       | high                                          | unclear                               | unclear                        | low                        | unclear                      |
| Jang HJ 2005 (53)       | unclear                           | unclear                       | unclear                                       | unclear                               | low                            | low                        | unclear                      |
| Javid G 2013 (54)       | low                               | low                           | high                                          | low                                   | unclear                        | low                        | unclear                      |
| Jiang YA 2013 (55)      | high                              | unclear                       | unclear                                       | unclear                               | low                            | low                        | unclear                      |
| Karatapanis S 2011 (56) | low                               | unclear                       | high                                          | low                                   | low                            | low                        | unclear                      |
| Katellaris PH 2002 (57) | low                               | low                           | high                                          | unclear                               | low                            | low                        | low                          |
| Keum B 2005 (58)        | high                              | high                          | high                                          | unclear                               | unclear                        | unclear                    | unclear                      |
| Kiliç ZM 2008 (59)      | unclear                           | unclear                       | high                                          | unclear                               | low                            | low                        | unclear                      |
| Kim BG 2007 (60)        | unclear                           | unclear                       | high                                          | unclear                               | low                            | low                        | unclear                      |
| Kim MN 2008 (61)        | high                              | unclear                       | high                                          | unclear                               | low                            | low                        | unclear                      |
| Kim N 2008 (62)         | low                               | unclear                       | low                                           | low                                   | low                            | low                        | unclear                      |
| Kim YS 2011 (63)        | low                               | high                          | high                                          | unclear                               | unclear                        | low                        | unclear                      |
| Kiyota K 1999 (64)      | unclear                           | unclear                       | high                                          | unclear                               | low                            | low                        | unclear                      |
| Lahbabi M 2013 (65)     | low                               | unclear                       | high                                          | unclear                               | low                            | low                        | unclear                      |
| Laine L 1996 (66)       | low                               | unclear                       | unclear                                       | unclear                               | low                            | low                        | unclear                      |
| Laine L 2003 (67)       | unclear                           | unclear                       | high                                          | low                                   | low                            | low                        | low                          |
| Liang Z 2010 (68)       | unclear                           | unclear                       | unclear                                       | unclear                               | low                            | low                        | unclear                      |

| <b>Study</b>                                          | <b>Random sequence generation</b> | <b>Allocation concealment</b> | <b>Blinding of participants and personnel</b> | <b>Blinding of outcome assessment</b> | <b>Incomplete outcome data</b> | <b>Selective reporting</b> | <b>Other sources of bias</b> |
|-------------------------------------------------------|-----------------------------------|-------------------------------|-----------------------------------------------|---------------------------------------|--------------------------------|----------------------------|------------------------------|
| Liao J 2013 (69)                                      | low                               | low                           | high                                          | unclear                               | low                            | low                        | low                          |
| Lim JH 2013 (70)                                      | low                               | unclear                       | high                                          | unclear                               | low                            | low                        | unclear                      |
| Liou JM 2013 (71)                                     | low                               | low                           | high                                          | unclear                               | low                            | low                        | low                          |
| Liou JM 2010 (72)                                     | low                               | low                           | high                                          | unclear                               | unclear                        | low                        | low                          |
| Liu KS 2013 (73)                                      | low                               | low                           | high                                          | low                                   | low                            | low                        | unclear                      |
| Louw JA 1998 (74)                                     | low                               | low                           | high                                          | unclear                               | low                            | low                        | unclear                      |
| Louw JA 1998 (75)                                     | unclear                           | unclear                       | high                                          | unclear                               | low                            | low                        | unclear                      |
| Ma CX 2008 (76)                                       | low                               | unclear                       | unclear                                       | unclear                               | unclear                        | low                        | unclear                      |
| Maconi G 2001 (77)                                    | unclear                           | unclear                       | high                                          | unclear                               | low                            | low                        | low                          |
| Malfertheiner P 2011 (78)                             | low                               | low                           | high                                          | unclear                               | low                            | low                        | low                          |
| Mantzaris GJ 2002 (79)                                | unclear                           | unclear                       | high                                          | low                                   | low                            | unclear                    | unclear                      |
| Mao HV 2000 (80)                                      | unclear                           | unclear                       | unclear                                       | unclear                               | low                            | low                        | unclear                      |
| McNicholl AG 2013 (81)                                | low                               | low                           | high                                          | low                                   | low                            | low                        | unclear                      |
| Mirbagheri SA 2006 (82)                               | unclear                           | unclear                       | unclear                                       | unclear                               | low                            | low                        | unclear                      |
| Moayyedi P 1996 (83)                                  | unclear                           | unclear                       | high                                          | low                                   | low                            | low                        | unclear                      |
| Molina-Infante J 2012 (84)                            | low                               | low                           | high                                          | unclear                               | low                            | unclear                    | unclear                      |
| Molina-Infante J 2010 (85)                            | low                               | unclear                       | high                                          | unclear                               | low                            | low                        | unclear                      |
| Molina-Infante J 2013 (86)                            | low                               | low                           | high                                          | unclear                               | low                            | unclear                    | unclear                      |
| Morse AL 2013 (87)                                    | low                               | low                           | high                                          | low                                   | unclear                        | unclear                    | low                          |
| Multiple Center Study Group in Beijing Area 2004 (88) | unclear                           | unclear                       | unclear                                       | unclear                               | unclear                        | low                        | unclear                      |
| Myllyluoma E 2005 (89)                                | low                               | unclear                       | low                                           | unclear                               | low                            | low                        | unclear                      |
| Nasa M 2013 (90)                                      | low                               | unclear                       | high                                          | unclear                               | low                            | low                        | unclear                      |

| <b>Study</b>             | <b>Random sequence generation</b> | <b>Allocation concealment</b> | <b>Blinding of participants and personnel</b> | <b>Blinding of outcome assessment</b> | <b>Incomplete outcome data</b> | <b>Selective reporting</b> | <b>Other sources of bias</b> |
|--------------------------|-----------------------------------|-------------------------------|-----------------------------------------------|---------------------------------------|--------------------------------|----------------------------|------------------------------|
| Nista EC 2004 (91)       | low                               | unclear                       | low                                           | unclear                               | low                            | low                        | unclear                      |
| Nista EC 2006 (92)       | low                               | unclear                       | high                                          | unclear                               | low                            | low                        | unclear                      |
| Oh HS 2012 (93)          | low                               | unclear                       | high                                          | unclear                               | low                            | low                        | unclear                      |
| Özdil K 2011 (94)        | unclear                           | unclear                       | unclear                                       | unclear                               | low                            | unclear                    | unclear                      |
| Pai CG 2003 (95)         | unclear                           | unclear                       | unclear                                       | unclear                               | low                            | low                        | unclear                      |
| Palmas F 2002 (96)       | unclear                           | unclear                       | unclear                                       | unclear                               | unclear                        | high                       | unclear                      |
| Paoluzi OA 2010 (97)     | low                               | unclear                       | high                                          | unclear                               | low                            | low                        | unclear                      |
| Paoluzi P 2006 (98)      | low                               | unclear                       | high                                          | unclear                               | high                           | unclear                    | unclear                      |
| Park HG 2012 (99)        | low                               | unclear                       | high                                          | unclear                               | low                            | low                        | unclear                      |
| Park SK 2007 (100)       | unclear                           | unclear                       | unclear                                       | low                                   | unclear                        | low                        | unclear                      |
| Qian J 2012 (101)        | low                               | unclear                       | unclear                                       | unclear                               | low                            | low                        | unclear                      |
| Riquelme A 2007 (102)    | high                              | high                          | high                                          | unclear                               | unclear                        | low                        | unclear                      |
| Robles-Jara C 2008 (103) | unclear                           | unclear                       | high                                          | unclear                               | unclear                        | unclear                    | unclear                      |
| Sardarian H 2013 (104)   | low                               | unclear                       | unclear                                       | low                                   | low                            | low                        | unclear                      |
| Savarino V 1999 (105)    | low                               | unclear                       | high                                          | unclear                               | low                            | low                        | unclear                      |
| Savarino V 2000 (106)    | low                               | unclear                       | high                                          | low                                   | low                            | low                        | low                          |
| Scaccianoce G 2006 (107) | low                               | unclear                       | high                                          | unclear                               | low                            | low                        | unclear                      |
| Scaccianoce G 2008 (108) | unclear                           | unclear                       | high                                          | unclear                               | low                            | low                        | unclear                      |
| Seddik H 2013 (109)      | low                               | unclear                       | high                                          | low                                   | low                            | low                        | unclear                      |
| Sheu BS 2002 (110)       | unclear                           | unclear                       | unclear                                       | unclear                               | unclear                        | low                        | unclear                      |
| Sokwala A 2012 (111)     | low                               | unclear                       | high                                          | unclear                               | unclear                        | low                        | unclear                      |
| Song MJ 2010 (112)       | low                               | unclear                       | unclear                                       | low                                   | unclear                        | low                        | unclear                      |
| Songür Y 2009 (113)      | low                               | unclear                       | high                                          | low                                   | low                            | low                        | unclear                      |

| <b>Study</b>           | <b>Random sequence generation</b> | <b>Allocation concealment</b> | <b>Blinding of participants and personnel</b> | <b>Blinding of outcome assessment</b> | <b>Incomplete outcome data</b> | <b>Selective reporting</b> | <b>Other sources of bias</b> |
|------------------------|-----------------------------------|-------------------------------|-----------------------------------------------|---------------------------------------|--------------------------------|----------------------------|------------------------------|
| Spinzi GC 2000 (114)   | low                               | low                           | high                                          | low                                   | low                            | low                        | unclear                      |
| Sun QJ 2010 (115)      | unclear                           | unclear                       | high                                          | low                                   | low                            | low                        | low                          |
| Sung JJ 1998 (116)     | unclear                           | unclear                       | high                                          | low                                   | unclear                        | low                        | unclear                      |
| Taghavi SA 2009 (117)  | unclear                           | unclear                       | low                                           | low                                   | high                           | low                        | high                         |
| Telaku S 2013 (118)    | unclear                           | unclear                       | high                                          | unclear                               | unclear                        | low                        | unclear                      |
| Ungan M 2001 (119)     | unclear                           | unclear                       | high                                          | unclear                               | low                            | unclear                    | unclear                      |
| Uygun A 2012 (120)     | low                               | low                           | high                                          | low                                   | low                            | low                        | unclear                      |
| Uygun A 2007 (121)     | low                               | unclear                       | high                                          | unclear                               | low                            | low                        | unclear                      |
| Vaira D 2007 (122)     | low                               | low                           | low                                           | low                                   | low                            | low                        | low                          |
| Vakil N 2004 (123)     | low                               | low                           | low                                           | low                                   | unclear                        | low                        | low                          |
| Valooran GJ 2011 (124) | low                               | low                           | unclear                                       | unclear                               | unclear                        | low                        | unclear                      |
| Wang PW 2008 (125)     | unclear                           | unclear                       | unclear                                       | unclear                               | low                            | low                        | unclear                      |
| Wong BC 2001 (126)     | low                               | low                           | unclear                                       | low                                   | low                            | low                        | low                          |
| Wu DC 2010 (127)       | low                               | low                           | high                                          | low                                   | low                            | low                        | low                          |
| Wu GL 2011 (128)       | low                               | unclear                       | unclear                                       | unclear                               | low                            | low                        | unclear                      |
| Xu MH 2011 (129)       | unclear                           | unclear                       | unclear                                       | unclear                               | low                            | low                        | low                          |
| Yanai A 2012 (130)     | unclear                           | low                           | unclear                                       | unclear                               | low                            | low                        | unclear                      |
| Yaşar B 2010 (131)     | unclear                           | unclear                       | unclear                                       | unclear                               | low                            | low                        | unclear                      |
| Zagari RM 2007 (132)   | low                               | low                           | low                                           | unclear                               | low                            | low                        | low                          |
| Zhang XM 2010 (133)    | unclear                           | unclear                       | unclear                                       | unclear                               | low                            | low                        | unclear                      |
| Zhao QX 2009 (134)     | unclear                           | unclear                       | unclear                                       | unclear                               | low                            | low                        | unclear                      |
| Zheng Q 2010 (135)     | unclear                           | unclear                       | high                                          | unclear                               | low                            | low                        | low                          |
| Zheng Q 2009 (136)     | unclear                           | unclear                       | high                                          | unclear                               | low                            | unclear                    | unclear                      |

| <b>Study</b>          | <b>Random sequence generation</b> | <b>Allocation concealment</b> | <b>Blinding of participants and personnel</b> | <b>Blinding of outcome assessment</b> | <b>Incomplete outcome data</b> | <b>Selective reporting</b> | <b>Other sources of bias</b> |
|-----------------------|-----------------------------------|-------------------------------|-----------------------------------------------|---------------------------------------|--------------------------------|----------------------------|------------------------------|
| Zheng Q 2006 (137)    | unclear                           | unclear                       | high                                          | unclear                               | low                            | low                        | low                          |
| Zhou YQ 2012 (138)    | low                               | unclear                       | high                                          | unclear                               | low                            | low                        | low                          |
| Ziemniak W 2006 (139) | unclear                           | unclear                       | unclear                                       | unclear                               | unclear                        | low                        | low                          |
| Zojaji H 2013 (140)   | unclear                           | unclear                       | unclear                                       | unclear                               | unclear                        | unclear                    | unclear                      |
| Zullo A 2005 (141)    | low                               | unclear                       | high                                          | low                                   | low                            | low                        | low                          |
| Zullo A 2013 (142)    | low                               | unclear                       | high                                          | unclear                               | low                            | low                        | unclear                      |
| Zullo A 2003 (143)    | low                               | low                           | high                                          | unclear                               | low                            | low                        | unclear                      |

The reference numbers in brackets are corresponding to the references presented in the web appendix 2.
