# Supplementary material
Source: PubMed Central journal article supplement (PMC4784868)
Supplement: baol025359.ww4_default.pdf [file baol025359.ww4_default.pdf]

**Web appendix 4 – ~~The efficacy of eradication therapies for *H. pylori* and the assessment of publication bias~~**

1. Efficacy assessment by intention to treat (ITT) analysis

Table S4.1 Network meta-analysis results

| Intervention              | Full analysis                                | Sensitivity analysis<br>( publication year)  | Sensitivity analysis<br>(quality of included study) | Sensitivity analysis<br>(sample size)        |
|---------------------------|----------------------------------------------|----------------------------------------------|-----------------------------------------------------|----------------------------------------------|
|                           | Risk Ratio (95% CrI),<br>random-effect model | Risk Ratio (95% CrI),<br>random-effect model | Risk Ratio (95% CrI),<br>random-effect model        | Risk Ratio (95% CrI),<br>random-effect model |
| <b>7d triple</b>          |                                              |                                              |                                                     |                                              |
| 7d concomitant            | 1.29 (1.22 to 1.35)                          | 1.29 (1.21 to 1.35)                          | 1.29 (1.21 to 1.35)                                 | 1.00 (0.99 to 1.01)                          |
| 10/14d sequential         | 1.20 (1.16 to 1.23)                          | 1.20 (1.16 to 1.24)                          | 1.20 (1.16 to 1.23)                                 | 1.19 (1.15 to 1.23)                          |
| 10/14d triple             | 1.12 (1.08 to 1.15)                          | 1.12 (1.08 to 1.15)                          | 1.11 (1.07 to 1.15)                                 | 1.11 (1.06 to 1.15)                          |
| 10/14d bismuth            | 1.17 (1.12 to 1.21)                          | 1.17 (1.12 to 1.22)                          | 1.18 (1.13 to 1.22)                                 | 1.16 (1.11 to 1.22)                          |
| 7d bismuth                | 1.08 (1.00 to 1.15)                          | 1.08 (1.00 to 1.16)                          | 1.08 (1.00 to 1.16)                                 | 1.08 (0.97 to 1.17)                          |
| 10/14d concomitant        | 1.24 (1.19 to 1.29)                          | 1.24 (1.19 to 1.29)                          | 1.24 (1.18 to 1.29)                                 | 1.21 (1.14 to 1.27)                          |
| 7d probiotic              | 1.14 (1.07 to 1.20)                          | 1.14 (1.06 to 1.20)                          | 1.14 (1.06 to 1.21)                                 | 1.14 (1.06 to 1.22)                          |
| 10/14d probiotic          | 1.24 (1.17 to 1.29)                          | 1.24 (1.17 to 1.30)                          | 1.24 (1.17 to 1.30)                                 | 1.23 (1.13 to 1.31)                          |
| 7d ranitidine bismuth     | 1.12 (1.04 to 1.18)                          | 1.12 (1.04 to 1.19)                          | 1.12 (1.04 to 1.19)                                 | 1.13 (1.03 to 1.21)                          |
| 10/14d ranitidine bismuth | 1.17 (1.07 to 1.25)                          | 1.18 (1.07 to 1.26)                          | 1.17 (1.07 to 1.25)                                 | 1.15 (1.02 to 1.25)                          |
| 7d levofloxacin           | 1.04 (0.95 to 1.11)                          | 1.04 (0.95 to 1.11)                          | 1.04 (0.95 to 1.11)                                 | 1.04 (0.94 to 1.12)                          |
| 10/14d levofloxacin       | 1.23 (1.16 to 1.29)                          | 1.23 (1.16 to 1.29)                          | 1.23 (1.15 to 1.29)                                 | 1.23 (1.14 to 1.30)                          |
| 14d hybrid                | 1.22 (1.11 to 1.29)                          | 1.22 (1.11 to 1.30)                          | 1.21 (1.10 to 1.30)                                 | 1.20 (1.07 to 1.29)                          |

| Intervention              | Full analysis                                | Sensitivity analysis<br>( publication year)  | Sensitivity analysis<br>(quality of included study) | Sensitivity analysis<br>(sample size)        |
|---------------------------|----------------------------------------------|----------------------------------------------|-----------------------------------------------------|----------------------------------------------|
|                           | Risk Ratio (95% CrI),<br>random-effect model | Risk Ratio (95% CrI),<br>random-effect model | Risk Ratio (95% CrI),<br>random-effect model        | Risk Ratio (95% CrI),<br>random-effect model |
| <b>7d concomitant</b>     |                                              |                                              |                                                     |                                              |
| 10/14d sequential         | 0.93 (0.89 to 0.99)                          | 0.93 (0.88 to 0.99)                          | 0.93 (0.88 to 0.99)                                 | 1.19 (1.15 to 1.23)                          |
| 10/14d triple             | 0.86 (0.82 to 0.92)                          | 0.86 (0.82 to 0.92)                          | 0.86 (0.81 to 0.92)                                 | 1.11 (1.06 to 1.15)                          |
| 10/14d bismuth            | 0.90 (0.86 to 0.97)                          | 0.90 (0.85 to 0.97)                          | 0.91 (0.86 to 0.97)                                 | 1.16 (1.11 to 1.22)                          |
| 7d bismuth                | 0.84 (0.76 to 0.91)                          | 0.84 (0.76 to 0.91)                          | 0.84 (0.76 to 0.91)                                 | 1.08 (0.97 to 1.17)                          |
| 10/14d concomitant        | 0.96 (0.91 to 1.02)                          | 0.96 (0.91 to 1.02)                          | 0.96 (0.90 to 1.02)                                 | 1.21 (1.15 to 1.27)                          |
| 7d probiotic              | 0.88 (0.81 to 0.95)                          | 0.88 (0.81 to 0.95)                          | 0.88 (0.81 to 0.96)                                 | 1.15 (1.06 to 1.22)                          |
| 10/14d probiotic          | 0.96 (0.90 to 1.03)                          | 0.96 (0.90 to 1.03)                          | 0.96 (0.89 to 1.03)                                 | 1.23 (1.13 to 1.31)                          |
| 7d ranitidine bismuth     | 0.86 (0.80 to 0.94)                          | 0.87 (0.79 to 0.94)                          | 0.87 (0.80 to 0.94)                                 | 1.13 (1.03 to 1.21)                          |
| 10/14d ranitidine bismuth | 0.91 (0.82 to 0.99)                          | 0.91 (0.82 to 0.99)                          | 0.91 (0.82 to 0.99)                                 | 1.15 (1.02 to 1.25)                          |
| 7d levofloxacin           | 0.80 (0.73 to 0.88)                          | 0.80 (0.72 to 0.88)                          | 0.80 (0.72 to 0.88)                                 | 1.04 (0.94 to 1.13)                          |
| 10/14d levofloxacin       | 0.95 (0.89 to 1.02)                          | 0.95 (0.88 to 1.02)                          | 0.95 (0.88 to 1.02)                                 | 1.23 (1.14 to 1.30)                          |
| 14d hybrid                | 0.94 (0.85 to 1.02)                          | 0.94 (0.85 to 1.02)                          | 0.94 (0.85 to 1.02)                                 | 1.20 (1.07 to 1.29)                          |
| <b>10/14d sequential</b>  |                                              |                                              |                                                     |                                              |
| 10/14d triple             | 0.93 (0.90 to 0.96)                          | 0.93 (0.90 to 0.96)                          | 0.93 (0.90 to 0.96)                                 | 0.93 (0.89 to 0.96)                          |
| 10/14d bismuth            | 0.98 (0.94 to 1.01)                          | 0.98 (0.94 to 1.01)                          | 0.98 (0.94 to 1.02)                                 | 0.98 (0.93 to 1.02)                          |
| 7d bismuth                | 0.90 (0.83 to 0.97)                          | 0.90 (0.83 to 0.97)                          | 0.90 (0.83 to 0.97)                                 | 0.91 (0.81 to 0.99)                          |

| Intervention              | Full analysis                                | Sensitivity analysis<br>( publication year)  | Sensitivity analysis<br>(quality of included study) | Sensitivity analysis<br>(sample size)        |
|---------------------------|----------------------------------------------|----------------------------------------------|-----------------------------------------------------|----------------------------------------------|
|                           | Risk Ratio (95% CrI),<br>random-effect model | Risk Ratio (95% CrI),<br>random-effect model | Risk Ratio (95% CrI),<br>random-effect model        | Risk Ratio (95% CrI),<br>random-effect model |
| 10/14d concomitant        | 1.04 (0.99 to 1.07)                          | 1.04 (0.99 to 1.07)                          | 1.03 (0.99 to 1.07)                                 | 1.02 (0.97 to 1.07)                          |
| 7d probiotic              | 0.95 (0.89 to 1.01)                          | 0.95 (0.88 to 1.00)                          | 0.95 (0.88 to 1.01)                                 | 0.96 (0.89 to 1.03)                          |
| 10/14d probiotic          | 1.03 (0.98 to 1.08)                          | 1.03 (0.98 to 1.08)                          | 1.03 (0.98 to 1.08)                                 | 1.04 (0.95 to 1.10)                          |
| 7d ranitidine bismuth     | 0.93 (0.87 to 0.99)                          | 0.93 (0.86 to 1.00)                          | 0.94 (0.87 to 1.00)                                 | 0.95 (0.86 to 1.02)                          |
| 10/14d ranitidine bismuth | 0.98 (0.90 to 1.04)                          | 0.98 (0.89 to 1.05)                          | 0.98 (0.89 to 1.05)                                 | 0.97 (0.85 to 1.05)                          |
| 7d levofloxacin           | 0.86 (0.79 to 0.93)                          | 0.86 (0.79 to 0.93)                          | 0.86 (0.79 to 0.93)                                 | 0.87 (0.79 to 0.95)                          |
| 10/14d levofloxacin       | 1.03 (0.97 to 1.08)                          | 1.03 (0.96 to 1.08)                          | 1.03 (0.96 to 1.08)                                 | 1.03 (0.95 to 1.09)                          |
| 14d hybrid                | 1.02 (0.93 to 1.08)                          | 1.02 (0.93 to 1.08)                          | 1.01 (0.93 to 1.08)                                 | 1.01 (0.90 to 1.08)                          |
| <b>10/14d triple</b>      |                                              |                                              |                                                     |                                              |
| 10/14d bismuth            | 1.05 (1.01 to 1.09)                          | 1.05 (1.01 to 1.09)                          | 1.06 (1.01 to 1.10)                                 | 1.05 (1.00 to 1.10)                          |
| 7d bismuth                | 0.97 (0.89 to 1.04)                          | 0.97 (0.89 to 1.04)                          | 0.97 (0.89 to 1.05)                                 | 0.98 (0.88 to 1.06)                          |
| 10/14d concomitant        | 1.11 (1.07 to 1.16)                          | 1.11 (1.06 to 1.16)                          | 1.11 (1.06 to 1.17)                                 | 1.10 (1.04 to 1.16)                          |
| 7d probiotic              | 1.02 (0.95 to 1.08)                          | 1.02 (0.95 to 1.08)                          | 1.03 (0.95 to 1.10)                                 | 1.04 (0.95 to 1.11)                          |
| 10/14d probiotic          | 1.11 (1.05 to 1.16)                          | 1.11 (1.05 to 1.17)                          | 1.11 (1.05 to 1.17)                                 | 1.12 (1.03 to 1.19)                          |
| 7d ranitidine bismuth     | 1.00 (0.93 to 1.07)                          | 1.00 (0.92 to 1.08)                          | 1.01 (0.93 to 1.08)                                 | 1.02 (0.93 to 1.10)                          |
| 10/14d ranitidine bismuth | 1.05 (0.97 to 1.12)                          | 1.06 (0.97 to 1.13)                          | 1.05 (0.97 to 1.13)                                 | 1.04 (0.92 to 1.13)                          |
| 7d levofloxacin           | 0.93 (0.85 to 1.00)                          | 0.93 (0.85 to 1.00)                          | 0.93 (0.85 to 1.01)                                 | 0.94 (0.85 to 1.03)                          |

| Intervention              | Full analysis                                | Sensitivity analysis<br>( publication year)  | Sensitivity analysis<br>(quality of included study) | Sensitivity analysis<br>(sample size)        |
|---------------------------|----------------------------------------------|----------------------------------------------|-----------------------------------------------------|----------------------------------------------|
|                           | Risk Ratio (95% CrI),<br>random-effect model | Risk Ratio (95% CrI),<br>random-effect model | Risk Ratio (95% CrI),<br>random-effect model        | Risk Ratio (95% CrI),<br>random-effect model |
| 10/14d levofloxacin       | 1.10 (1.04 to 1.16)                          | 1.10 (1.04 to 1.16)                          | 1.11 (1.04 to 1.16)                                 | 1.11 (1.03 to 1.18)                          |
| 14d hybrid                | 1.09 (1.00 to 1.16)                          | 1.09 (0.99 to 1.17)                          | 1.09 (0.99 to 1.17)                                 | 1.08 (0.97 to 1.17)                          |
| <b>10/14d bismuth</b>     |                                              |                                              |                                                     |                                              |
| 7d bismuth                | 0.92 (0.85 to 0.99)                          | 0.92 (0.85 to 0.99)                          | 0.92 (0.85 to 0.99)                                 | 0.93 (0.83 to 1.01)                          |
| 10/14d concomitant        | 1.06 (1.01 to 1.11)                          | 1.06 (1.01 to 1.11)                          | 1.05 (1.00 to 1.11)                                 | 1.04 (0.98 to 1.10)                          |
| 7d probiotic              | 0.97 (0.90 to 1.04)                          | 0.97 (0.90 to 1.04)                          | 0.97 (0.90 to 1.04)                                 | 0.98 (0.90 to 1.06)                          |
| 10/14d probiotic          | 1.06 (1.00 to 1.12)                          | 1.06 (1.00 to 1.12)                          | 1.05 (0.99 to 1.11)                                 | 1.06 (0.97 to 1.14)                          |
| 7d ranitidine bismuth     | 0.96 (0.88 to 1.02)                          | 0.96 (0.88 to 1.03)                          | 0.96 (0.88 to 1.03)                                 | 0.97 (0.88 to 1.05)                          |
| 10/14d ranitidine bismuth | 1.00 (0.92 to 1.08)                          | 1.01 (0.91 to 1.08)                          | 1.00 (0.91 to 1.07)                                 | 0.99 (0.87 to 1.08)                          |
| 7d levofloxacin           | 0.89 (0.81 to 0.96)                          | 0.89 (0.81 to 0.96)                          | 0.88 (0.80 to 0.95)                                 | 0.89 (0.80 to 0.98)                          |
| 10/14d levofloxacin       | 1.05 (0.99 to 1.11)                          | 1.05 (0.99 to 1.11)                          | 1.05 (0.98 to 1.11)                                 | 1.06 (0.98 to 1.13)                          |
| 14d hybrid                | 1.04 (0.95 to 1.11)                          | 1.04 (0.95 to 1.12)                          | 1.03 (0.94 to 1.11)                                 | 1.03 (0.92 to 1.12)                          |
| <b>7d bismuth</b>         |                                              |                                              |                                                     |                                              |
| 10/14d concomitant        | 1.15 (1.06 to 1.25)                          | 1.15 (1.06 to 1.26)                          | 1.15 (1.06 to 1.25)                                 | 1.13 (1.02 to 1.26)                          |
| 7d probiotic              | 1.05 (0.96 to 1.16)                          | 1.05 (0.96 to 1.16)                          | 1.06 (0.96 to 1.17)                                 | 1.06 (0.95 to 1.20)                          |
| 10/14d probiotic          | 1.15 (1.05 to 1.26)                          | 1.15 (1.05 to 1.26)                          | 1.15 (1.05 to 1.26)                                 | 1.15 (1.02 to 1.29)                          |
| 7d ranitidine bismuth     | 1.04 (0.94 to 1.14)                          | 1.04 (0.94 to 1.15)                          | 1.04 (0.94 to 1.15)                                 | 1.05 (0.93 to 1.18)                          |

| Intervention              | Full analysis                                | Sensitivity analysis<br>( publication year)  | Sensitivity analysis<br>(quality of included study) | Sensitivity analysis<br>(sample size)        |
|---------------------------|----------------------------------------------|----------------------------------------------|-----------------------------------------------------|----------------------------------------------|
|                           | Risk Ratio (95% CrI),<br>random-effect model | Risk Ratio (95% CrI),<br>random-effect model | Risk Ratio (95% CrI),<br>random-effect model        | Risk Ratio (95% CrI),<br>random-effect model |
| 10/14d ranitidine bismuth | 1.09 (0.97 to 1.20)                          | 1.09 (0.97 to 1.21)                          | 1.08 (0.97 to 1.20)                                 | 1.07 (0.92 to 1.22)                          |
| 7d levofloxacin           | 0.96 (0.87 to 1.06)                          | 0.96 (0.87 to 1.06)                          | 0.96 (0.86 to 1.06)                                 | 0.97 (0.85 to 1.09)                          |
| 10/14d levofloxacin       | 1.14 (1.04 to 1.25)                          | 1.14 (1.04 to 1.25)                          | 1.14 (1.04 to 1.25)                                 | 1.14 (1.02 to 1.28)                          |
| 14d hybrid                | 1.13 (1.01 to 1.25)                          | 1.13 (1.01 to 1.25)                          | 1.12 (1.00 to 1.25)                                 | 1.11 (0.97 to 1.26)                          |
| <b>10/14d concomitant</b> |                                              |                                              |                                                     |                                              |
| 7d probiotic              | 0.92 (0.85 to 0.98)                          | 0.91 (0.85 to 0.98)                          | 0.92 (0.85 to 0.99)                                 | 0.94 (0.86 to 1.02)                          |
| 10/14d probiotic          | 1.00 (0.94 to 1.06)                          | 1.00 (0.94 to 1.06)                          | 1.00 (0.94 to 1.06)                                 | 1.02 (0.93 to 1.10)                          |
| 7d ranitidine bismuth     | 0.90 (0.83 to 0.97)                          | 0.90 (0.83 to 0.97)                          | 0.91 (0.84 to 0.98)                                 | 0.93 (0.84 to 1.01)                          |
| 10/14d ranitidine bismuth | 0.95 (0.86 to 1.02)                          | 0.95 (0.86 to 1.02)                          | 0.95 (0.86 to 1.02)                                 | 0.95 (0.83 to 1.05)                          |
| 7d levofloxacin           | 0.83 (0.76 to 0.90)                          | 0.83 (0.76 to 0.90)                          | 0.84 (0.76 to 0.91)                                 | 0.86 (0.77 to 0.94)                          |
| 10/14d levofloxacin       | 0.99 (0.93 to 1.05)                          | 0.99 (0.93 to 1.05)                          | 0.99 (0.93 to 1.06)                                 | 1.01 (0.93 to 1.09)                          |
| 14d hybrid                | 0.98 (0.90 to 1.05)                          | 0.98 (0.90 to 1.05)                          | 0.98 (0.89 to 1.05)                                 | 0.99 (0.89 to 1.07)                          |
| <b>7d probiotic</b>       |                                              |                                              |                                                     |                                              |
| 10/14d probiotic          | 1.09 (1.01 to 1.18)                          | 1.09 (1.01 to 1.18)                          | 1.09 (1.01 to 1.18)                                 | 1.08 (0.97 to 1.19)                          |
| 7d ranitidine bismuth     | 0.99 (0.90 to 1.07)                          | 0.99 (0.90 to 1.08)                          | 0.99 (0.90 to 1.08)                                 | 0.98 (0.89 to 1.09)                          |
| 10/14d ranitidine bismuth | 1.03 (0.93 to 1.13)                          | 1.04 (0.93 to 1.14)                          | 1.03 (0.92 to 1.13)                                 | 1.01 (0.88 to 1.13)                          |
| 7d levofloxacin           | 0.91 (0.82 to 1.00)                          | 0.91 (0.82 to 1.00)                          | 0.91 (0.82 to 1.00)                                 | 0.91 (0.81 to 1.01)                          |

| Intervention                     | Full analysis                                | Sensitivity analysis<br>( publication year)  | Sensitivity analysis<br>(quality of included study) | Sensitivity analysis<br>(sample size)        |
|----------------------------------|----------------------------------------------|----------------------------------------------|-----------------------------------------------------|----------------------------------------------|
|                                  | Risk Ratio (95% CrI),<br>random-effect model | Risk Ratio (95% CrI),<br>random-effect model | Risk Ratio (95% CrI),<br>random-effect model        | Risk Ratio (95% CrI),<br>random-effect model |
| 10/14d levofloxacin              | 1.08 (1.00 to 1.17)                          | 1.08 (1.00 to 1.17)                          | 1.08 (0.99 to 1.17)                                 | 1.07 (0.97 to 1.18)                          |
| 14d hybrid                       | 1.07 (0.97 to 1.17)                          | 1.07 (0.96 to 1.17)                          | 1.07 (0.95 to 1.17)                                 | 1.05 (0.92 to 1.16)                          |
| <b>10/14d probiotic</b>          |                                              |                                              |                                                     |                                              |
| 7d ranitidine bismuth            | 0.90 (0.83 to 0.98)                          | 0.90 (0.83 to 0.98)                          | 0.91 (0.83 to 0.99)                                 | 0.91 (0.82 to 1.01)                          |
| 10/14d ranitidine bismuth        | 0.95 (0.86 to 1.03)                          | 0.95 (0.86 to 1.03)                          | 0.95 (0.86 to 1.03)                                 | 0.93 (0.82 to 1.04)                          |
| 7d levofloxacin                  | 0.84 (0.76 to 0.91)                          | 0.84 (0.76 to 0.91)                          | 0.84 (0.76 to 0.91)                                 | 0.84 (0.75 to 0.94)                          |
| 10/14d levofloxacin              | 0.99 (0.93 to 1.06)                          | 0.99 (0.93 to 1.06)                          | 0.99 (0.93 to 1.06)                                 | 1.00 (0.92 to 1.08)                          |
| 14d hybrid                       | 0.98 (0.89 to 1.06)                          | 0.98 (0.89 to 1.06)                          | 0.98 (0.89 to 1.06)                                 | 0.97 (0.86 to 1.08)                          |
| <b>7d ranitidine bismuth</b>     |                                              |                                              |                                                     |                                              |
| 10/14d ranitidine bismuth        | 1.05 (0.95 to 1.15)                          | 1.05 (0.94 to 1.17)                          | 1.04 (0.94 to 1.14)                                 | 1.02 (0.90 to 1.14)                          |
| 7d levofloxacin                  | 0.93 (0.84 to 1.02)                          | 0.93 (0.83 to 1.03)                          | 0.92 (0.83 to 1.02)                                 | 0.93 (0.82 to 1.04)                          |
| 10/14d levofloxacin              | 1.10 (1.01 to 1.20)                          | 1.10 (1.01 to 1.20)                          | 1.09 (1.00 to 1.19)                                 | 1.09 (0.99 to 1.21)                          |
| 14d hybrid                       | 1.09 (0.98 to 1.19)                          | 1.09 (0.97 to 1.20)                          | 1.08 (0.97 to 1.19)                                 | 1.07 (0.93 to 1.19)                          |
| <b>10/14d ranitidine bismuth</b> |                                              |                                              |                                                     |                                              |
| 7d levofloxacin                  | 0.88 (0.79 to 0.99)                          | 0.88 (0.79 to 0.99)                          | 0.89 (0.79 to 0.99)                                 | 0.91 (0.79 to 1.04)                          |
| 10/14d levofloxacin              | 1.05 (0.96 to 1.15)                          | 1.05 (0.96 to 1.16)                          | 1.05 (0.96 to 1.16)                                 | 1.07 (0.96 to 1.22)                          |
| 14d hybrid                       | 1.04 (0.93 to 1.15)                          | 1.04 (0.92 to 1.16)                          | 1.04 (0.93 to 1.16)                                 | 1.05 (0.91 to 1.20)                          |

| <b>Intervention</b>        | <b>Full analysis</b>                                 | <b>Sensitivity analysis<br/>( publication year)</b>  | <b>Sensitivity analysis<br/>(quality of included study)</b> | <b>Sensitivity analysis<br/>(sample size)</b>        |
|----------------------------|------------------------------------------------------|------------------------------------------------------|-------------------------------------------------------------|------------------------------------------------------|
|                            | <b>Risk Ratio (95% CrI),<br/>random-effect model</b> | <b>Risk Ratio (95% CrI),<br/>random-effect model</b> | <b>Risk Ratio (95% CrI),<br/>random-effect model</b>        | <b>Risk Ratio (95% CrI),<br/>random-effect model</b> |
| <b>7d levofloxacin</b>     |                                                      |                                                      |                                                             |                                                      |
| 10/14d levofloxacin        | 1.19 (1.09 to 1.31)                                  | 1.19 (1.09 to 1.31)                                  | 1.19 (1.09 to 1.31)                                         | 1.18 (1.06 to 1.32)                                  |
| 14d hybrid                 | 1.18 (1.05 to 1.31)                                  | 1.18 (1.05 to 1.31)                                  | 1.17 (1.04 to 1.31)                                         | 1.16 (1.01 to 1.30)                                  |
| <b>10/14d levofloxacin</b> |                                                      |                                                      |                                                             |                                                      |
| 14d hybrid                 | 0.99 (0.90 to 1.07)                                  | 0.99 (0.89 to 1.08)                                  | 0.99 (0.89 to 1.08)                                         | 0.98 (0.86 to 1.08)                                  |

CrI=credible interval;

See Table 1 for key of intervention regimen names and descriptions.

Table S4.2 Traditional meta-analysis results

|                                             | <b>Studies</b> | <b>Participants</b> | <b>Statistical Method</b>        | <b>Effect Estimate</b> | <b>Heterogeneity</b>           |
|---------------------------------------------|----------------|---------------------|----------------------------------|------------------------|--------------------------------|
| 7d concomitant VS. 7d triple                | 1              | 119                 | Risk Ratio (M-H, Random, 95% CI) | 1.39 (1.16 to 1.67)    | Not applicable                 |
| 10/14d sequential VS. 7d triple             | 15             | 3713                | Risk Ratio (M-H, Random, 95% CI) | 1.22 (1.19 to 1.27)    | P = 0.67; I <sup>2</sup> =0%   |
| 10/14d triple VS. 7d triple                 | 32             | 6844                | Risk Ratio (M-H, Random, 95% CI) | 1.08 (1.05 to 1.12)    | P = 0.10; I <sup>2</sup> =25%  |
| 10/14d bismuth VS. 7d triple                | 6              | 1188                | Risk Ratio (M-H, Random, 95% CI) | 1.27 (1.04 to 1.55)    | P<0.00001; I <sup>2</sup> =88% |
| 7d bismuth VS. 7d triple                    | 8              | 1340                | Risk Ratio (M-H, Random, 95% CI) | 1.07 (1.00 to 1.15)    | P = 0.13; I <sup>2</sup> =38%  |
| 7d probiotic VS.7d triple                   | 11             | 2392                | Risk Ratio (M-H, Random, 95% CI) | 1.14 (1.09 to 1.19)    | P = 0.83; I <sup>2</sup> =0%   |
| 10/14d probiotic VS.7 triple                | 1              | 33                  | Risk Ratio (M-H, Random, 95% CI) | 1.13 (0.69 to 1.84)    | Not applicable                 |
| 7d ranitidine bismuth VS. 7d triple         | 11             | 1839                | Risk Ratio (M-H, Random, 95% CI) | 1.10 (1.04 to 1.16)    | P = 0.16; I <sup>2</sup> =30%  |
| 7d levofloxacin VS.7d triple                | 8              | 2329                | Risk Ratio (M-H, Random, 95% CI) | 1.01 (0.92 to 1.10)    | P<0.00001; I <sup>2</sup> =77% |
| 10/14d triple VS. 7d concomitant            | 2              | 265                 | Risk Ratio (M-H, Random, 95% CI) | 0.88 (0.74 to 1.03)    | P = 0.06; I <sup>2</sup> =72%  |
| 10/14d concomitant VS. 7d concomitant       | 1              | 180                 | Risk Ratio (M-H, Random, 95% CI) | 0.99 (0.89 to 1.09)    | Not applicable                 |
| 7d ranitidine bismuth VS. 7d concomitant    | 1              | 55                  | Risk Ratio (M-H, Random, 95% CI) | 0.90 (0.79 to 1.04)    | Not applicable                 |
| 10/14d triple VS. 10/14d sequential         | 18             | 5032                | Risk Ratio (M-H, Random, 95% CI) | 0.91 (0.86 to 0.96)    | P<0.00001; I <sup>2</sup> =70% |
| 10/14d bismuth VS. 10/14d sequential        | 4              | 1011                | Risk Ratio (M-H, Random, 95% CI) | 1.01 (0.96 to 1.06)    | P = 0.37; I <sup>2</sup> =5%   |
| 10/14d concomitant VS. 10/14d sequential    | 5              | 921                 | Risk Ratio (M-H, Random, 95% CI) | 1.05 (1.00 to 1.10)    | P = 0.54; I <sup>2</sup> =0%   |
| 7d levofloxacin VS. 10/14d sequential       | 1              | 229                 | Risk Ratio (M-H, Random, 95% CI) | 1.00 (0.87 to 1.14)    | Not applicable                 |
| 10/14d levofloxacin VS.10/14d sequential    | 1              | 230                 | Risk Ratio (M-H, Random, 95% CI) | 1.06 (0.92 to 1.21)    | Not applicable                 |
| 14d hybrid VS. 10/14d sequential            | 2              | 600                 | Risk Ratio (M-H, Random, 95% CI) | 1.02 (0.77 to 1.34)    | P=0.0002; I <sup>2</sup> =93%  |
| 10/14d bismuth VS. 10/14d triple            | 9              | 1844                | Risk Ratio (M-H, Random, 95% CI) | 0.99 (0.88 to 1.12)    | P<0.0001; I <sup>2</sup> =78%  |
| 10/14d concomitant VS. 10/14d triple        | 3              | 506                 | Risk Ratio (M-H, Random, 95% CI) | 1.23 (1.13 to 1.34)    | P = 0.85; I <sup>2</sup> =0%   |
| 10/14d probiotic VS.10/14d triple           | 5              | 687                 | Risk Ratio (M-H, Random, 95% CI) | 1.16 (1.07 to 1.27)    | P = 0.26; I <sup>2</sup> =25%  |
| 7d ranitidine bismuth VS. 10/14d triple     | 1              | 90                  | Risk Ratio (M-H, Random, 95% CI) | 0.98 (0.85 to 1.13)    | Not applicable                 |
| 10/14d ranitidine bismuth VS. 10/14d triple | 5              | 948                 | Risk Ratio (M-H, Random, 95% CI) | 1.09 (0.98 to 1.20)    | P = 0.17; I <sup>2</sup> =37%  |
| 10/14d levofloxacin VS. 10/14d triple       | 3              | 554                 | Risk Ratio (M-H, Random, 95% CI) | 1.16 (1.06 to 1.27)    | P = 0.46; I <sup>2</sup> =0%   |
| 7d bismuth VS. 10/14d bismuth               | 3              | 404                 | Risk Ratio (M-H, Random, 95% CI) | 0.89 (0.81 to 0.97)    | P = 0.45; I <sup>2</sup> =0%   |
| 10/14d concomitant VS. 10/14d bismuth       | 2              | 360                 | Risk Ratio (M-H, Random, 95% CI) | 0.93 (0.84 to 1.03)    | P = 0.93; I <sup>2</sup> =0%   |
| 10/14d probiotic VS. 10/14d bismuth         | 1              | 294                 | Risk Ratio (M-H, Random, 95% CI) | 1.35 (1.22 to 1.48)    | Not applicable                 |
| 10/14d levofloxacin VS. 10/14d bismuth      | 1              | 161                 | Risk Ratio (M-H, Random, 95% CI) | 0.95 (0.83 to 1.08)    | Not applicable                 |



|                                                     | <b>Studies</b> | <b>Participants</b> | <b>Statistical Method</b>        | <b>Effect Estimate</b> | <b>Heterogeneity</b>          |
|-----------------------------------------------------|----------------|---------------------|----------------------------------|------------------------|-------------------------------|
| 7d levofloxacin VS. 7d bismuth                      | 2              | 225                 | Risk Ratio (M-H, Random, 95% CI) | 0.96 (0.80 to 1.15)    | P = 0.19; I <sup>2</sup> =41% |
| 14d hybrid VS. 10/14d concomitant                   | 1              | 340                 | Risk Ratio (M-H, Random, 95% CI) | 0.98 (0.92 to 1.05)    | Not applicable                |
| 10/14d probiotic VS. 7d probiotic                   | 1              | 49                  | Risk Ratio (M-H, Random, 95% CI) | 1.33 (0.85 to 2.08)    | Not applicable                |
| 10/14d levofloxacin VS. 10/14d probiotic            | 1              | 193                 | Risk Ratio (M-H, Random, 95% CI) | 1.19 (1.03 to 1.38)    | Not applicable                |
| 10/14d ranitidine bismuth VS. 7d ranitidine bismuth | 1              | 110                 | Risk Ratio (M-H, Random, 95% CI) | 1.02 (0.87 to 1.20)    | Not applicable                |
| 10/14d levofloxacin VS. 7d levofloxacin             | 1              | 105                 | Risk Ratio (M-H, Random, 95% CI) | 1.09 (0.96 to 1.23)    | Not applicable                |

CI=confidence interval; M-H=Mantel-Haenszel (test).

See Table 1 for key of intervention regimen names and descriptions.

Fig S4.1 Assessment of publication bias-Funnel plot of eradication therapies for *H. pylori* by ITT analysis

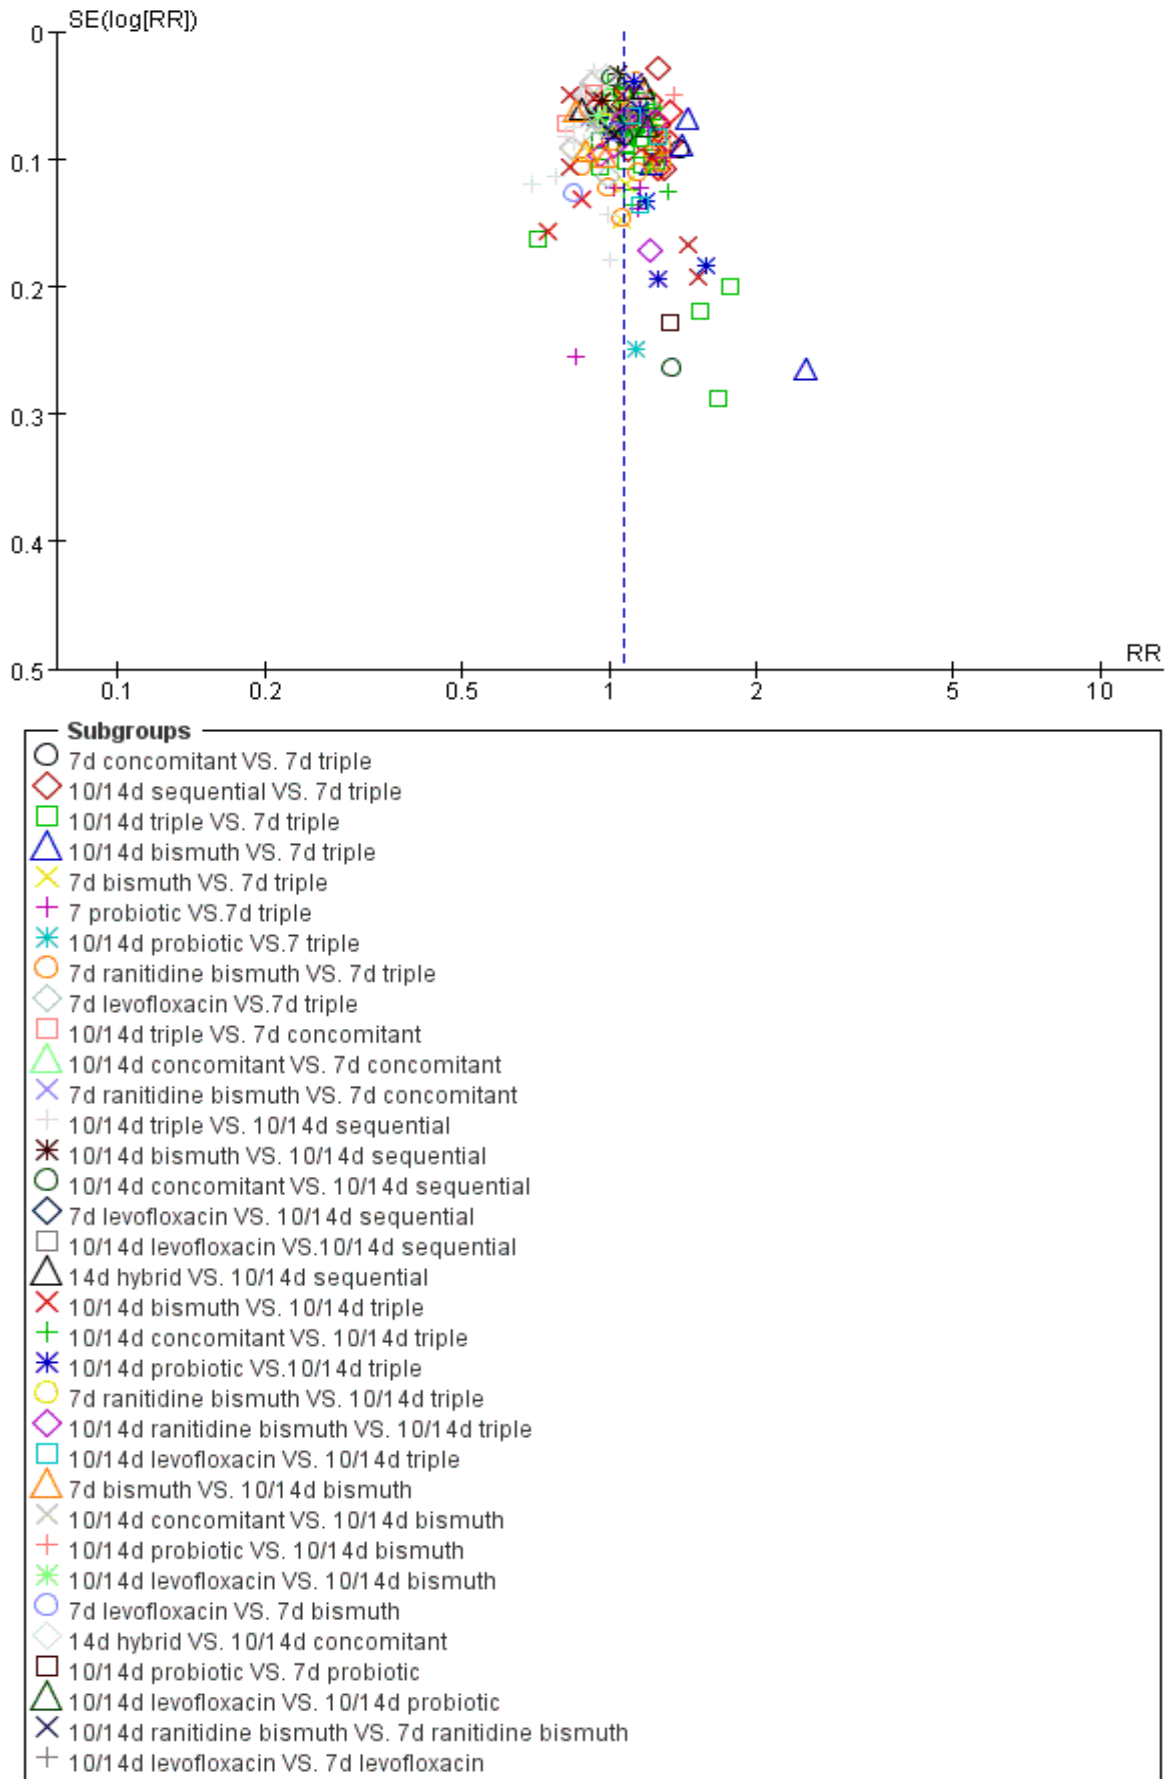

See Table 1 for key of intervention regimen names and descriptions.

Table S4.3 Eradication rates for each country.

| Interventions                | Eradication rates<br>mean (95% CrI) |                     |                      |                      |                      |                      |                      |
|------------------------------|-------------------------------------|---------------------|----------------------|----------------------|----------------------|----------------------|----------------------|
|                              | China                               | Korea               | Iran                 | Italy                | Turkey               | India                | Spain                |
| A) 7d triple                 | 0.74 (0.69 to 0.79)*                | 0.71(0.68 to 0.74)* | 0.80 (0.41 to 0.97)  | 0.71 (0.68 to 0.74)* | 0.36 (0.20 to 0.55)* | 0.15 (0.00 to 0.58)  | 0.75 (0.71 to 0.79)* |
| B) 7d concomitant            | NA                                  | NA                  | NA                   | NA                   | 0.98 (0.67 to 1.00)  | NA                   | NA                   |
| C) 10/14d sequential         | 0.87 (0.80 to 0.93)                 | 0.83 (0.78 to 0.87) | 0.80 (0.75 to 0.84)  | 0.92 (0.88 to 0.94)  | NA                   | 0.83 (0.62 to 0.94)  | 0.87 (0.74 to 0.95)  |
| D) 10/14d triple             | 0.76 (0.60 to 0.88)                 | 0.78 (0.72 to 0.83) | 0.88 (0.68 to 0.97)  | 0.78 (0.73 to 0.83)  | 0.58 (0.49 to 0.66)  | 0.75 (0.65 to 0.83)* | 0.79 (0.67 to 0.88)  |
| E) 10/14d bismuth            | 0.90 (0.83 to 0.95)                 | NA                  | 0.79 (0.57 to 0.93)* | NA                   | 0.72 (0.60 to 0.82)  | 0.60 (0.18 to 0.92)  | NA                   |
| F) 7d bismuth                | 0.83 (0.73 to 0.90)                 | 0.62(0.40 to 0.80)  | 0.76 (0.34 to 0.97)  | NA                   | NA                   | NA                   | 0.80 (0.64 to 0.91)  |
| G) 10/14d concomitant        | NA                                  | 0.86 (0.72 to 0.94) | 0.69 (0.25 to 0.95)  | 0.83 (0.44 to 0.99)  | 0.65 (0.41 to 0.85)  | NA                   | 0.91 (0.79 to 0.97)  |
| H) 7d probiotic              | 0.86 (0.70 to 0.96)                 | 0.80 (0.73 to 0.85) | NA                   | 0.77 (0.67 to 0.86)  | NA                   | NA                   | NA                   |
| J) 10/14d probiotic          | NA                                  | NA                  | 0.95 (0.77 to 1.00)  | 0.84 (0.62 to 0.96)  | 0.74 (0.60 to 0.86)  | NA                   | NA                   |
| K) 7d ranitidine bismuth     | 0.86 (0.73 to 0.94)                 | NA                  | NA                   | 0.72 (0.61 to 0.82)  | 0.44 (0.09 to 0.85)  | NA                   | 0.81 (0.72 to 0.89)  |
| L) 10/14d ranitidine bismuth | NA                                  | NA                  | NA                   | 0.74 (0.47 to 0.92)  | 0.67 (0.53 to 0.80)  | NA                   | NA                   |
| M) 7d levofloxacin           | 0.78 (0.66 to 0.87)                 | 0.57 (0.37 to 0.74) | NA                   | 0.78 (0.68 to 0.85)  | NA                   | NA                   | NA                   |
| N) 10/14d levofloxacin       | 0.85 (0.60 to 0.96)                 | NA                  | NA                   | NA                   | 0.86 (0.69 to 0.96)  | 0.81 (0.45 to 0.97)  | 0.88 (0.76 to 0.95)  |
| P) 14d hybrid                | NA                                  | NA                  | 0.90 (0.68 to 0.98)  | 0.79 (0.59 to 0.92)  | NA                   | NA                   | 0.88 (0.68 to 0.98)  |

CrI=credible interval;

See Table 1 for key of intervention regimen names and descriptions.

Note: \* indicates the group is the reference group in this country.
