# Supplementary material
Source: PubMed Central journal article supplement (PMC4784868)
Supplement: baol025359.ww5_default.pdf [file baol025359.ww5_default.pdf]

## Web appendix 5 – The tolerance of eradication therapies for *H. pylori*

Part A) All adverse events

Table S5.1 Direct and network-meta analysis results for all adverse event outcomes

| Intervention              | Adverse events                                |                                          |
|---------------------------|-----------------------------------------------|------------------------------------------|
|                           | Network-meta analysis<br>risk ratio (95% CrI) | Direct comparison<br>risk ratio (95% CI) |
| <b>7d triple</b>          |                                               |                                          |
| 7d concomitant            | 1.19 (0.49 to 2.20)                           | 1.10 (0.70 to 1.73)                      |
| 10/14d sequential         | 1.00 (0.85 to 1.18)                           | 0.99 (0.83 to 1.19)                      |
| 10/14d triple             | 1.10 (0.94 to 1.26)                           | 1.14 (1.01 to 1.28)                      |
| 10/14d bismuth            | 1.08 (0.85 to 1.34)                           | 0.86 (0.74 to 1.01)                      |
| 7d bismuth                | 0.97 (0.69 to 1.32)                           | 1.04 (0.94 to 1.16)                      |
| 10/14d concomitant        | 1.13 (0.83 to 1.48)                           | NA                                       |
| 7d probiotic              | 0.65 (0.47 to 0.87)                           | 0.72 (0.49 to 1.06)                      |
| 10/14d probiotic          | 1.59 (0.44 to 3.18)                           | 1.25 (0.41 to 3.77)                      |
| 7d ranitidine bismuth     | 1.16 (0.81 to 1.59)                           | 1.29 (1.06 to 1.56)                      |
| 10/14d ranitidine bismuth | 0.99 (0.64 to 1.42)                           | NA                                       |
| 7d levofloxacin           | 0.69 (0.49 to 0.94)                           | 0.72 (0.54 to 0.95)                      |
| 10/14d levofloxacin       | 1.26 (0.83 to 1.79)                           | NA                                       |
| 14d hybrid                | 1.22 (0.72 to 1.86)                           | NA                                       |
| <b>7d concomitant</b>     |                                               |                                          |
| 10/14d sequential         | 0.98 (0.45 to 2.09)                           | NA                                       |
| 10/14d triple             | 1.07 (0.49 to 2.27)                           | NA                                       |
| 10/14d bismuth            | 1.05 (0.47 to 2.27)                           | NA                                       |
| 7d bismuth                | 0.95 (0.40 to 2.09)                           | NA                                       |
| 10/14d concomitant        | 1.10 (0.48 to 2.41)                           | NA                                       |
| 7d probiotic              | 0.64 (0.27 to 1.39)                           | NA                                       |
| 10/14d probiotic          | 1.55 (0.33 to 4.19)                           | NA                                       |
| 7d ranitidine bismuth     | 1.14 (0.48 to 2.50)                           | NA                                       |
| 10/14d ranitidine bismuth | 0.97 (0.39 to 2.16)                           | NA                                       |
| 7d levofloxacin           | 0.68 (0.29 to 1.48)                           | NA                                       |

| Intervention              | Adverse events                                |                                          |
|---------------------------|-----------------------------------------------|------------------------------------------|
|                           | Network-meta analysis<br>risk ratio (95% CrI) | Direct comparison<br>risk ratio (95% CI) |
| 10/14d levofloxacin       | 1.23 (0.51 to 2.76)                           | NA                                       |
| 14d hybrid                | 1.19 (0.46 to 2.74)                           | NA                                       |
| <b>10/14d sequential</b>  |                                               |                                          |
| 10/14d triple             | 1.10 (0.93 to 1.29)                           | 1.01 (0.85 to 1.19)                      |
| 10/14d bismuth            | 1.08 (0.85 to 1.35)                           | 1.21 (0.77-1.90)                         |
| 7d bismuth                | 0.98 (0.67 to 1.37)                           | NA                                       |
| 10/14d concomitant        | 1.13 (0.85 to 1.45)                           | 1.08 (0.95 to 1.22)                      |
| 7d probiotic              | 0.65 (0.45 to 0.91)                           | NA                                       |
| 10/14d probiotic          | 1.60 (0.44 to 3.26)                           | NA                                       |
| 7d ranitidine bismuth     | 1.17 (0.78 to 1.65)                           | NA                                       |
| 10/14d ranitidine bismuth | 0.99 (0.64 to 1.44)                           | NA                                       |
| 7d levofloxacin           | 0.69 (0.48 to 0.97)                           | 0.40 (0.08 to 2.04)                      |
| 10/14d levofloxacin       | 1.27 (0.83 to 1.80)                           | 1.10 (0.72 to 1.70)                      |
| 14d hybrid                | 1.22 (0.74 to 1.82)                           | 1.17 (0.89 to 1.55)                      |
| <b>10/14d triple</b>      |                                               |                                          |
| 10/14d bismuth            | 0.99 (0.78 to 1.23)                           | 1.03 (0.86 to 1.23)                      |
| 7d bismuth                | 0.89 (0.62 to 1.24)                           | NA                                       |
| 10/14d concomitant        | 1.03 (0.76 to 1.35)                           | 1.09 (0.74 to 1.60)                      |
| 7d probiotic              | 0.60 (0.41 to 0.82)                           | NA                                       |
| 10/14d probiotic          | 1.46 (0.40 to 2.97)                           | NA                                       |
| 7d ranitidine bismuth     | 1.07 (0.72 to 1.49)                           | NA                                       |
| 10/14d ranitidine bismuth | 0.90 (0.60 to 1.27)                           | 0.91 (0.77 to 1.09)                      |
| 7d levofloxacin           | 0.63 (0.44 to 0.88)                           | NA                                       |
| 10/14d levofloxacin       | 1.16 (0.77 to 1.62)                           | 1.18 (0.96 to 1.46)                      |
| 14d hybrid                | 1.12 (0.65 to 1.71)                           | NA                                       |
| <b>10/14d bismuth</b>     |                                               |                                          |

| Intervention              | Adverse events                                |                                          |
|---------------------------|-----------------------------------------------|------------------------------------------|
|                           | Network-meta analysis<br>risk ratio (95% CrI) | Direct comparison<br>risk ratio (95% CI) |
| 7d bismuth                | 0.91 (0.63 to 1.27)                           | 0.68 (0.45 to 1.02)                      |
| 10/14d concomitant        | 1.06 (0.76 to 1.41)                           | 1.06 (0.57 to 1.95)                      |
| 7d probiotic              | 0.61 (0.41 to 0.87)                           | NA                                       |
| 10/14d probiotic          | 1.49 (0.41 to 3.09)                           | NA                                       |
| 7d ranitidine bismuth     | 1.09 (0.71 to 1.59)                           | NA                                       |
| 10/14d ranitidine bismuth | 0.93 (0.58 to 1.38)                           | NA                                       |
| 7d levofloxacin           | 0.65 (0.43 to 0.93)                           | NA                                       |
| 10/14d levofloxacin       | 1.18 (0.75 to 1.72)                           | 1.48 (0.43 to 5.05)                      |
| 14d hybrid                | 1.15 (0.65 to 1.80)                           | NA                                       |
| <b>7d bismuth</b>         |                                               |                                          |
| 10/14d concomitant        | 1.19 (0.76 to 1.78)                           | NA                                       |
| 7d probiotic              | 0.69 (0.42 to 1.05)                           | NA                                       |
| 10/14d probiotic          | 1.68 (0.44 to 3.58)                           | NA                                       |
| 7d ranitidine bismuth     | 1.23 (0.74 to 1.90)                           | NA                                       |
| 10/14d ranitidine bismuth | 1.04 (0.60 to 1.67)                           | NA                                       |
| 7d levofloxacin           | 0.73 (0.46 to 1.10)                           | 0.60 (0.24 to 1.49)                      |
| 10/14d levofloxacin       | 1.33 (0.78 to 2.10)                           | NA                                       |
| 14d hybrid                | 1.29 (0.68 to 2.15)                           | NA                                       |
| <b>10/14d concomitant</b> |                                               |                                          |
| 7d probiotic              | 0.59 (0.38 to 0.88)                           | NA                                       |
| 10/14d probiotic          | 1.44 (0.38 to 3.03)                           | NA                                       |
| 7d ranitidine bismuth     | 1.05 (0.66 to 1.60)                           | NA                                       |
| 10/14d ranitidine bismuth | 0.89 (0.54 to 1.38)                           | NA                                       |
| 7d levofloxacin           | 0.63 (0.40 to 0.94)                           | NA                                       |
| 10/14d levofloxacin       | 1.14 (0.70 to 1.73)                           | NA                                       |
| 14d hybrid                | 1.10 (0.62 to 1.76)                           | NA                                       |

| Intervention                     | Adverse events                                |                                          |
|----------------------------------|-----------------------------------------------|------------------------------------------|
|                                  | Network-meta analysis<br>risk ratio (95% CrI) | Direct comparison<br>risk ratio (95% CI) |
| <b>7d probiotic</b>              |                                               |                                          |
| 10/14d probiotic                 | 2.48 (0.69 to 5.11)                           | 2.67 (0.83 to 8.53)                      |
| 7d ranitidine bismuth            | 1.83 (1.13 to 2.82)                           | NA                                       |
| 10/14d ranitidine bismuth        | 1.56 (0.91 to 2.49)                           | NA                                       |
| 7d levofloxacin                  | 1.09 (0.68 to 1.67)                           | NA                                       |
| 10/14d levofloxacin              | 1.99 (1.17 to 3.15)                           | NA                                       |
| 14d hybrid                       | 1.93 (1.03 to 3.23)                           | NA                                       |
| <b>10/14d probiotic</b>          |                                               |                                          |
| 7d ranitidine bismuth            | 0.96 (0.33 to 2.71)                           | NA                                       |
| 10/14d ranitidine bismuth        | 0.81 (0.27 to 2.33)                           | NA                                       |
| 7d levofloxacin                  | 0.57 (0.20 to 1.61)                           | NA                                       |
| 10/14d levofloxacin              | 1.04 (0.35 to 2.96)                           | NA                                       |
| 14d hybrid                       | 1.01 (0.32 to 2.90)                           | NA                                       |
| <b>7d ranitidine bismuth</b>     |                                               |                                          |
| 10/14d ranitidine bismuth        | 0.87 (0.52 to 1.37)                           | 1.38 (0.60 to 3.15)                      |
| 7d levofloxacin                  | 0.61 (0.37 to 0.96)                           | NA                                       |
| 10/14d levofloxacin              | 1.12 (0.64 to 1.80)                           | NA                                       |
| 14d hybrid                       | 1.08 (0.57 to 1.84)                           | NA                                       |
| <b>10/14d ranitidine bismuth</b> |                                               |                                          |
| 7d levofloxacin                  | 0.73 (0.43 to 1.18)                           | NA                                       |
| 10/14d levofloxacin              | 1.33 (0.75 to 2.17)                           | NA                                       |
| 14d hybrid                       | 1.28 (0.66 to 2.23)                           | NA                                       |
| <b>7d levofloxacin</b>           |                                               |                                          |
| 10/14d levofloxacin              | 1.87 (1.11 to 2.95)                           | 0.82 (0.14 to 4.72)                      |
| 14d hybrid                       | 1.82 (0.96 to 3.05)                           | NA                                       |
| <b>10/14d levofloxacin</b>       |                                               |                                          |

| <b>Intervention</b> | <b>Adverse events</b>                                 |                                                  |
|---------------------|-------------------------------------------------------|--------------------------------------------------|
|                     | <b>Network-meta analysis<br/>risk ratio (95% CrI)</b> | <b>Direct comparison<br/>risk ratio (95% CI)</b> |
| 14d hybrid          | 1.00 (0.52 to 1.72)                                   | NA                                               |

CrI=credible interval; CI=confidence interval; NA=not applicable.  
 See Table 1 for key of intervention regimen names and descriptions.

Table S5.2 Traditional meta-analysis results

|                                                     | <b>Studies</b> | <b>Participants</b> | <b>Statistical Method</b>        | <b>Effect Estimate</b> | <b>Heterogeneity</b>            |
|-----------------------------------------------------|----------------|---------------------|----------------------------------|------------------------|---------------------------------|
| 7d concomitant VS. 7d triple                        | 1              | 110                 | Risk Ratio (M-H, Random, 95% CI) | 1.10 (0.70 to 1.73)    | Not applicable                  |
| 10/14d sequential VS. 7d triple                     | 13             | 3216                | Risk Ratio (M-H, Random, 95% CI) | 0.99 (0.83 to 1.19)    | P = 0.20; I <sup>2</sup> =24%   |
| 10/14d triple VS. 7d triple                         | 22             | 4560                | Risk Ratio (M-H, Random, 95% CI) | 1.14 (1.01 to 1.28)    | P = 0.89; I <sup>2</sup> =0%    |
| 10/14d bismuth VS. 7d triple                        | 4              | 970                 | Risk Ratio (M-H, Random, 95% CI) | 0.86 (0.74 to 1.01)    | P=0.45; I <sup>2</sup> =0%      |
| 7d bismuth VS. 7d triple                            | 5              | 764                 | Risk Ratio (M-H, Random, 95% CI) | 1.04 (0.94 to 1.16)    | P = 0.78; I <sup>2</sup> =0%    |
| 7d probiotic VS. 7d triple                          | 9              | 2158                | Risk Ratio (M-H, Random, 95% CI) | 0.72 (0.49 to 1.06)    | P <0.00001; I <sup>2</sup> =84% |
| 10/14d probiotic VS. 7d triple                      | 1              | 30                  | Risk Ratio (M-H, Random, 95% CI) | 1.25 (0.41 to 3.77)    | Not applicable                  |
| 7d ranitidine bismuth VS. 7d triple                 | 6              | 943                 | Risk Ratio (M-H, Random, 95% CI) | 1.29 (1.06 to 1.56)    | P = 0.52; I <sup>2</sup> =0%    |
| 7d levofloxacin VS. 7d triple                       | 6              | 1413                | Risk Ratio (M-H, Random, 95% CI) | 0.72 (0.54 to 0.95)    | P = 0.20; I <sup>2</sup> =31%   |
| 10/14 triple VS. 10/14d sequential                  | 13             | 3340                | Risk Ratio (M-H, Random, 95% CI) | 1.01 (0.85 to 1.19)    | P = 0.20; I <sup>2</sup> =24%   |
| 10/14d bismuth VS. 10/14d sequential                | 4              | 1011                | Risk Ratio (M-H, Random, 95% CI) | 1.21 (0.77 to 1.90)    | P = 0.17; I <sup>2</sup> =41%   |
| 10/14d concomitant VS. 10/14d sequential            | 4              | 903                 | Risk Ratio (M-H, Random, 95% CI) | 1.08 (0.95 to 1.22)    | P = 0.45; I <sup>2</sup> =0%    |
| 7d levofloxacin VS. 10/14d sequential               | 1              | 229                 | Risk Ratio (M-H, Random, 95% CI) | 0.40 (0.08 to 2.04)    | Not applicable                  |
| 10/14d levofloxacin VS. 10/14d sequential           | 1              | 230                 | Risk Ratio (M-H, Random, 95% CI) | 1.10 (0.72 to 1.70)    | Not applicable                  |
| 14d hybrid VS. 10/14 days sequential                | 2              | 600                 | Risk Ratio (M-H, Random, 95% CI) | 1.17 (0.89 to 1.55)    | P = 0.69; I <sup>2</sup> =0%    |
| 10/14d bismuth VS. 10/14d triple                    | 3              | 753                 | Risk Ratio (M-H, Random, 95% CI) | 1.03 (0.86 to 1.23)    | P = 0.43; I <sup>2</sup> =0%    |
| 10/14d concomitant VS. 10/14d triple                | 1              | 246                 | Risk Ratio (M-H, Random, 95% CI) | 1.09 (0.74 to 1.60)    | Not applicable                  |
| 10/14d ranitidine bismuth VS. 10/14d triple         | 4              | 550                 | Risk Ratio (M-H, Random, 95% CI) | 0.91 (0.77 to 1.09)    | P = 0.64; I <sup>2</sup> =0%    |
| 10/14d levofloxacin VS. 10/14d triple               | 2              | 480                 | Risk Ratio (M-H, Random, 95% CI) | 1.18 (0.96 to 1.46)    | P = 0.71; I <sup>2</sup> =0%    |
| 7d bismuth VS. 10/14d bismuth                       | 2              | 316                 | Risk Ratio (M-H, Random, 95% CI) | 0.68 (0.45 to 1.02)    | P = 0.60; I <sup>2</sup> =0%    |
| 10/14d concomitant VS. 10/14d bismuth               | 2              | 358                 | Risk Ratio (M-H, Random, 95% CI) | 1.06 (0.57 to 1.95)    | P = 0.16; I <sup>2</sup> =50%   |
| 10/14d levofloxacin VS. 10/14d bismuth              | 1              | 161                 | Risk Ratio (M-H, Random, 95% CI) | 1.48 (0.43 to 5.05)    | Not applicable                  |
| 7d levofloxacin VS. 7d bismuth                      | 1              | 80                  | Risk Ratio (M-H, Random, 95% CI) | 0.60 (0.24 to 1.49)    | Not applicable                  |
| 10/14d probiotic VS. 7d probiotic                   | 1              | 47                  | Risk Ratio (M-H, Random, 95% CI) | 2.67 (0.83 to 8.53)    | Not applicable                  |
| 10/14d ranitidine bismuth VS. 7d ranitidine bismuth | 1              | 110                 | Risk Ratio (M-H, Random, 95% CI) | 1.38 (0.60 to 3.15)    | Not applicable                  |
| 10/14d levofloxacin VS. 7d levofloxacin             | 1              | 105                 | Risk Ratio (M-H, Random, 95% CI) | 0.82 (0.14 to 4.72)    | Not applicable                  |

CI=confidence interval; M-H=Mantel-Haenszel (test).

See Table 1 for key of intervention regimen names and descriptions.

Fig S5.1 Assessment of publication bias-Funnel plot of all reported adverse events

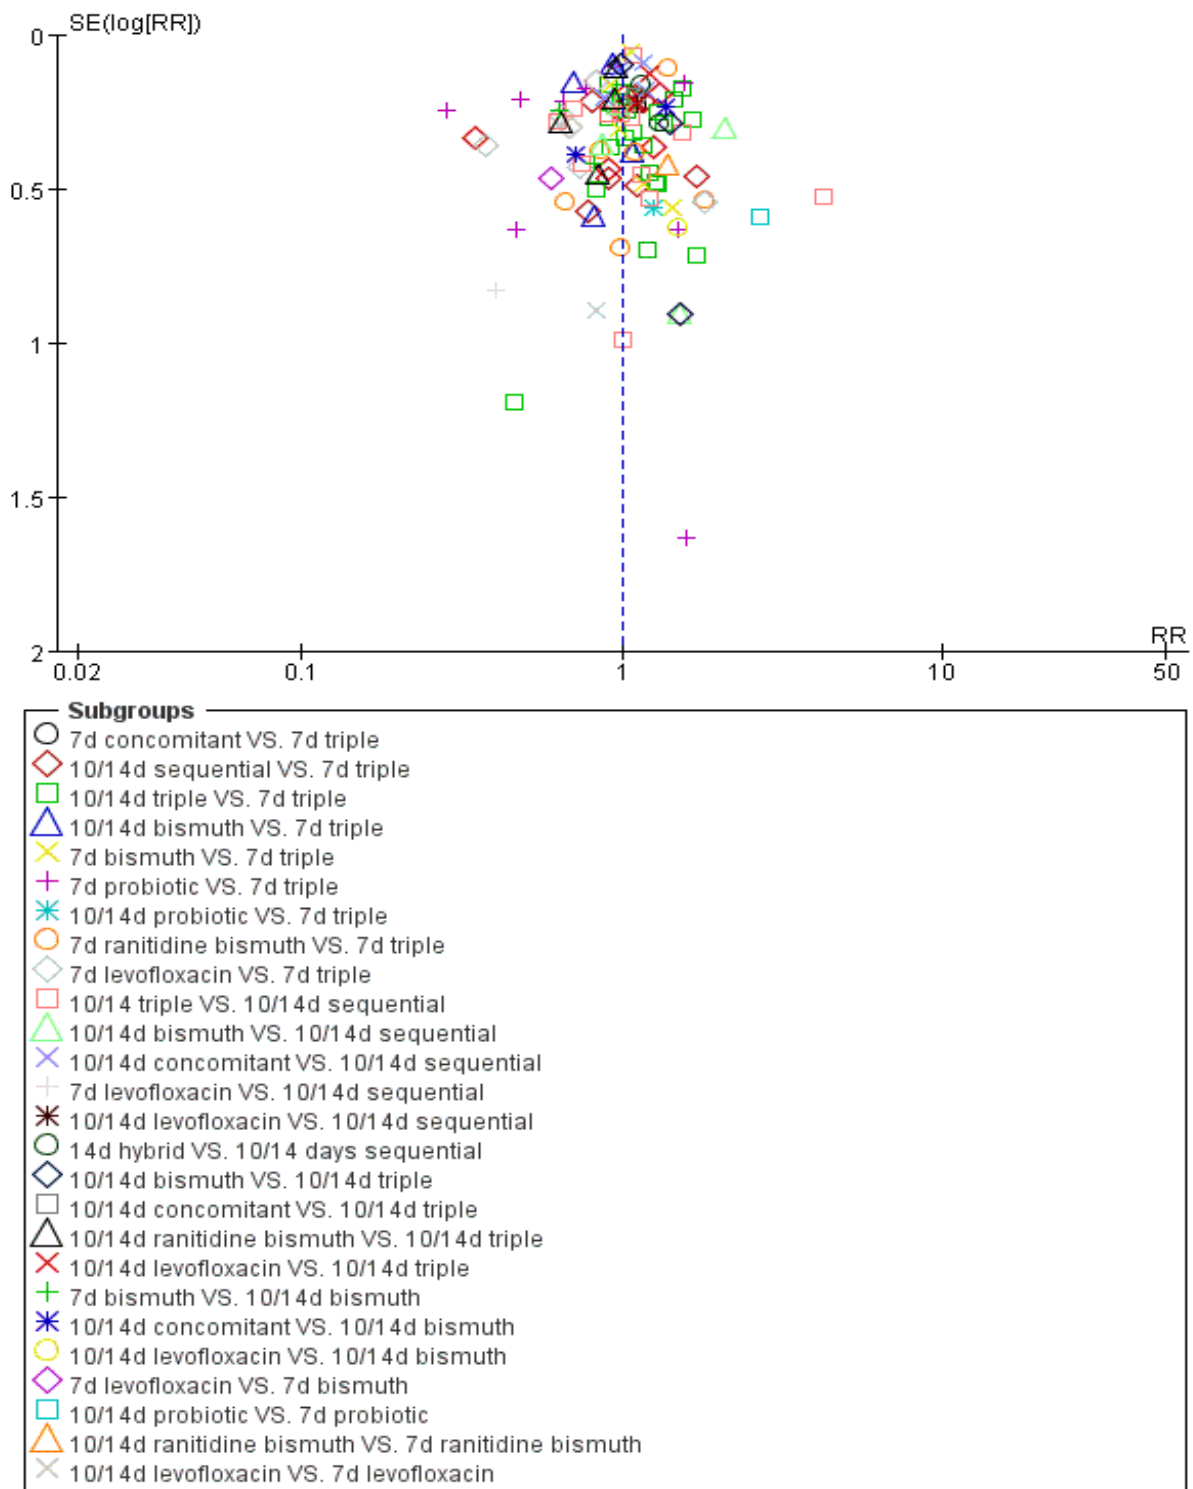

See Table 1 for key of intervention regimen names and descriptions.



## Part B) Adverse event: abdominal or epigastric pain

Table S5.3 Direct and network-meta analysis results for abdominal or epigastric pain adverse events

| Intervention              | Abdominal or epigastric pain                  |                                          |
|---------------------------|-----------------------------------------------|------------------------------------------|
|                           | Network-meta analysis<br>risk ratio (95% CrI) | Direct comparison<br>risk ratio (95% CI) |
| <b>7d triple</b>          |                                               |                                          |
| 7d concomitant            | 2.95 (0.65 to 8.16)                           | 2.25 (0.61 to 8.25)                      |
| 10/14d sequential         | 1.08 (0.76 to 1.50)                           | 0.97 (0.63 to 1.50)                      |
| 10/14d triple             | 1.21 (0.86 to 1.68)                           | 1.35 (0.85 to 2.13)                      |
| 10/14d bismuth            | 1.36 (0.86 to 2.01)                           | 1.26 (0.73 to 2.19)                      |
| 7d bismuth                | 1.31 (0.70 to 2.29)                           | 1.10 (0.33 to 3.68)                      |
| 10/14d concomitant        | 1.19 (0.67 to 1.92)                           | NA                                       |
| 7d probiotic              | 0.67 (0.41 to 1.04)                           | 0.69 (0.44 to 1.09)                      |
| 10/14d probiotic          | 0.36 (0.17 to 0.65)                           | 0.33 (0.01 to 7.58)                      |
| 7d ranitidine bismuth     | 0.19 (0.01 to 0.82)                           | 1.00 (0.06 to 15.69)                     |
| 10/14d ranitidine bismuth | 0.19 (0.02 to 0.62)                           | NA                                       |
| 7d levofloxacin           | 0.82 (0.45 to 1.32)                           | 0.83 (0.49 to 1.39)                      |
| 10/14d levofloxacin       | 0.56 (0.18 to 1.26)                           | NA                                       |
| 14d hybrid                | 0.50 (0.15 to 1.27)                           | NA                                       |
| <b>7d concomitant</b>     |                                               |                                          |
| 10/14d sequential         | 0.56 (0.12 to 1.72)                           | NA                                       |
| 10/14d triple             | 0.62 (0.14 to 1.93)                           | NA                                       |
| 10/14d bismuth            | 0.70 (0.15 to 2.18)                           | NA                                       |
| 7d bismuth                | 0.67 (0.13 to 2.16)                           | NA                                       |
| 10/14d concomitant        | 0.61 (0.12 to 1.94)                           | NA                                       |
| 7d probiotic              | 0.35 (0.07 to 1.07)                           | NA                                       |
| 10/14d probiotic          | 0.19 (0.04 to 0.62)                           | NA                                       |
| 7d ranitidine bismuth     | 0.10 (0.00 to 0.48)                           | NA                                       |
| 10/14d ranitidine bismuth | 0.10 (0.01 to 0.43)                           | NA                                       |

| Intervention              | Abdominal or epigastric pain                  |                                          |
|---------------------------|-----------------------------------------------|------------------------------------------|
|                           | Network-meta analysis<br>risk ratio (95% CrI) | Direct comparison<br>risk ratio (95% CI) |
| 7d levofloxacin           | 0.42 (0.09 to 1.36)                           | NA                                       |
| 10/14d levofloxacin       | 0.29 (0.04 to 1.07)                           | NA                                       |
| 14d hybrid                | 0.26 (0.04 to 0.99)                           | NA                                       |
| <b>10/14d sequential</b>  |                                               |                                          |
| 10/14d triple             | 1.13 (0.86 to 1.47)                           | 1.09 (0.83 to 1.44)                      |
| 10/14d bismuth            | 1.28 (0.82 to 1.91)                           | 1.79 (0.56 to 5.79)                      |
| 7d bismuth                | 1.25 (0.62 to 2.25)                           | NA                                       |
| 10/14d concomitant        | 1.11 (0.68 to 1.67)                           | 0.82 (0.49 to 1.36)                      |
| 7d probiotic              | 0.64 (0.35 to 1.08)                           | NA                                       |
| 10/14d probiotic          | 0.34 (0.17 to 0.59)                           | NA                                       |
| 7d ranitidine bismuth     | 0.18 (0.01 to 0.77)                           | NA                                       |
| 10/14d ranitidine bismuth | 0.18 (0.02 to 0.58)                           | NA                                       |
| 7d levofloxacin           | 0.78 (0.39 to 1.35)                           | NA                                       |
| 10/14d levofloxacin       | 0.52 (0.18 to 1.15)                           | 0.38 (0.10 to 1.38)                      |
| 14d hybrid                | 0.47 (0.15 to 1.09)                           | 0.48 (0.13 to 1.70)                      |
| <b>10/14d triple</b>      |                                               |                                          |
| 10/14d bismuth            | 1.14 (0.73 to 1.68)                           | 1.06 (0.57 to 1.95)                      |
| 7d bismuth                | 1.11 (0.54 to 2.00)                           | NA                                       |
| 10/14d concomitant        | 0.99 (0.60 to 1.53)                           | 1.36 (0.71 to 2.58)                      |
| 7d probiotic              | 0.57 (0.31 to 0.96)                           | NA                                       |
| 10/14d probiotic          | 0.30 (0.16 to 0.49)                           | 0.43 (0.30 to 0.62)                      |
| 7d ranitidine bismuth     | 0.16 (0.01 to 0.68)                           | NA                                       |
| 10/14d ranitidine bismuth | 0.16 (0.02 to 0.50)                           | 0.09 (0.01 to 0.66)                      |
| 7d levofloxacin           | 0.69 (0.35 to 1.21)                           | NA                                       |
| 10/14d levofloxacin       | 0.46 (0.16 to 0.99)                           | 0.50 (0.21 to 1.17)                      |
| 14d hybrid                | 0.42 (0.13 to 1.02)                           | NA                                       |

| Intervention              | Abdominal or epigastric pain                  |                                          |
|---------------------------|-----------------------------------------------|------------------------------------------|
|                           | Network-meta analysis<br>risk ratio (95% CrI) | Direct comparison<br>risk ratio (95% CI) |
| <b>10/14d bismuth</b>     |                                               |                                          |
| 7d bismuth                | 1.00 (0.48 to 1.85)                           | 1.33 (0.31 to 5.76)                      |
| 10/14d concomitant        | 0.90 (0.50 to 1.48)                           | 1.54 (0.45 to 5.24)                      |
| 7d probiotic              | 0.52 (0.27 to 0.92)                           | NA                                       |
| 10/14d probiotic          | 0.28 (0.13 to 0.51)                           | NA                                       |
| 7d ranitidine bismuth     | 0.15 (0.01 to 0.60)                           | NA                                       |
| 10/14d ranitidine bismuth | 0.14 (0.02 to 0.47)                           | NA                                       |
| 7d levofloxacin           | 0.63 (0.29 to 1.16)                           | NA                                       |
| 10/14d levofloxacin       | 0.42 (0.13 to 0.98)                           | NA                                       |
| 14d hybrid                | 0.38 (0.11 to 0.98)                           | NA                                       |
| <b>7d bismuth</b>         |                                               |                                          |
| 10/14d concomitant        | 0.98 (0.43 to 1.93)                           | NA                                       |
| 7d probiotic              | 0.56 (0.25 to 1.10)                           | NA                                       |
| 10/14d probiotic          | 0.30 (0.12 to 0.63)                           | NA                                       |
| 7d ranitidine bismuth     | 0.16 (0.01 to 0.64)                           | NA                                       |
| 10/14d ranitidine bismuth | 0.16 (0.02 to 0.55)                           | NA                                       |
| 7d levofloxacin           | 0.68 (0.29 to 1.34)                           | 0.30 (0.01 to 6.10)                      |
| 10/14d levofloxacin       | 0.46 (0.13 to 1.15)                           | NA                                       |
| 14d hybrid                | 0.42 (0.11 to 1.15)                           | NA                                       |
| <b>10/14d concomitant</b> |                                               |                                          |
| 7d probiotic              | 0.61 (0.29 to 1.15)                           | NA                                       |
| 10/14d probiotic          | 0.32 (0.15 to 0.61)                           | NA                                       |
| 7d ranitidine bismuth     | 0.17 (0.01 to 0.70)                           | NA                                       |
| 10/14d ranitidine bismuth | 0.17 (0.02 to 0.60)                           | NA                                       |
| 7d levofloxacin           | 0.74 (0.33 to 1.45)                           | NA                                       |
| 10/14d levofloxacin       | 0.49 (0.15 to 1.14)                           | NA                                       |

| Intervention                     | Abdominal or epigastric pain                  |                                          |
|----------------------------------|-----------------------------------------------|------------------------------------------|
|                                  | Network-meta analysis<br>risk ratio (95% CrI) | Direct comparison<br>risk ratio (95% CI) |
| 14d hybrid                       | 0.44 (0.13 to 1.12)                           | NA                                       |
| <b>7d probiotic</b>              |                                               |                                          |
| 10/14d probiotic                 | 0.57 (0.23 to 1.17)                           | 0.69 (0.03 to 15.95)                     |
| 7d ranitidine bismuth            | 0.30 (0.02 to 1.33)                           | NA                                       |
| 10/14d ranitidine bismuth        | 0.30 (0.03 to 1.01)                           | NA                                       |
| 7d levofloxacin                  | 1.29 (0.58 to 2.44)                           | NA                                       |
| 10/14d levofloxacin              | 0.88 (0.25 to 2.19)                           | NA                                       |
| 14d hybrid                       | 0.80 (0.21 to 2.17)                           | NA                                       |
| <b>10/14d probiotic</b>          |                                               |                                          |
| 7d ranitidine bismuth            | 0.58 (0.04 to 2.59)                           | NA                                       |
| 10/14d ranitidine bismuth        | 0.56 (0.06 to 1.93)                           | NA                                       |
| 7d levofloxacin                  | 2.50 (0.97 to 5.36)                           | NA                                       |
| 10/14d levofloxacin              | 1.65 (0.48 to 4.03)                           | NA                                       |
| 14d hybrid                       | 1.51 (0.39 to 4.07)                           | NA                                       |
| <b>7d ranitidine bismuth</b>     |                                               |                                          |
| 10/14d ranitidine bismuth        | 1.51 (0.28 to 4.91)                           | 1.67 (0.42 to 6.64)                      |
| 7d levofloxacin                  | 12.75 (0.94 to 68.58)                         | NA                                       |
| 10/14d levofloxacin              | 8.31 (0.55 to 44.58)                          | NA                                       |
| 14d hybrid                       | 7.46 (0.49 to 38.81)                          | NA                                       |
| <b>10/14d ranitidine bismuth</b> |                                               |                                          |
| 7d levofloxacin                  | 9.39 (1.14 to 43.80)                          | NA                                       |
| 10/14d levofloxacin              | 6.10 (0.66 to 29.85)                          | NA                                       |
| 14d hybrid                       | 5.44 (0.56 to 25.32)                          | NA                                       |
| <b>7d levofloxacin</b>           |                                               |                                          |
| 10/14d levofloxacin              | 0.73 (0.20 to 1.80)                           | NA                                       |
| 14d hybrid                       | 0.66 (0.17 to 1.85)                           | NA                                       |

| <b>Intervention</b>        | <b>Abdominal or epigastric pain</b>                   |                                                  |
|----------------------------|-------------------------------------------------------|--------------------------------------------------|
|                            | <b>Network-meta analysis<br/>risk ratio (95% CrI)</b> | <b>Direct comparison<br/>risk ratio (95% CI)</b> |
| <b>10/14d levofloxacin</b> |                                                       |                                                  |
| 14d hybrid                 | 1.13 (0.24 to 3.48)                                   | NA                                               |

CrI=credible interval; CI=confidence interval; NA=not applicable.  
See Table 1 for key of intervention regimen names and descriptions.

Table S5.4 Traditional meta-analysis results

|                                                     | <b>Studies</b> | <b>Participants</b> | <b>Statistical Method</b>        | <b>Effect Estimate</b> | <b>Heterogeneity</b>          |
|-----------------------------------------------------|----------------|---------------------|----------------------------------|------------------------|-------------------------------|
| 7d concomitant VS. 7d triple                        | 1              | 110                 | Risk Ratio (M-H, Random, 95% CI) | 2.25 (0.61 to 8.25)    | Not applicable                |
| 10/14d sequential VS. 7d triple                     | 10             | 2823                | Risk Ratio (M-H, Random, 95% CI) | 0.97 (0.63 to 1.50)    | P = 0.71; I <sup>2</sup> =0%  |
| 10/14d triple VS. 7d triple                         | 8              | 2300                | Risk Ratio (M-H, Random, 95% CI) | 1.35 (0.85 to 2.13)    | P = 0.96; I <sup>2</sup> =0%  |
| 10/14d bismuth VS. 7d triple                        | 2              | 581                 | Risk Ratio (M-H, Random, 95% CI) | 1.26 (0.73 to 2.19)    | P = 0.97; I <sup>2</sup> =0%  |
| 7d bismuth VS. 7d triple                            | 3              | 482                 | Risk Ratio (M-H, Random, 95% CI) | 1.10 (0.33 to 3.68)    | P = 0.26; I <sup>2</sup> =26% |
| 7d probiotic VS. 7d triple                          | 6              | 1309                | Risk Ratio (M-H, Random, 95% CI) | 0.69 (0.44 to 1.09)    | P = 0.29; I <sup>2</sup> =19% |
| 10/14d probiotic VS. 7d triple                      | 1              | 30                  | Risk Ratio (M-H, Random, 95% CI) | 0.33 (0.01 to 7.58)    | Not applicable                |
| 7d ranitidine bismuth VS. 7d triple                 | 1              | 150                 | Risk Ratio (M-H, Random, 95% CI) | 1.00 (0.06 to 15.69)   | Not applicable                |
| 7d levofloxacin VS. 7d triple                       | 6              | 1545                | Risk Ratio (M-H, Random, 95% CI) | 0.83 (0.49 to 1.39)    | P = 0.88; I <sup>2</sup> =0%  |
| 10/14d triple VS. 10/14d sequential                 | 11             | 2975                | Risk Ratio (M-H, Random, 95% CI) | 1.09 (0.83 to 1.44)    | P = 0.96; I <sup>2</sup> =0%  |
| 10/14d bismuth VS. 10/14d sequential                | 4              | 1011                | Risk Ratio (M-H, Random, 95% CI) | 1.79 (0.56 to 5.79)    | P = 0.30; I <sup>2</sup> =16% |
| 10/14d concomitant VS. 10/14d sequential            | 4              | 903                 | Risk Ratio (M-H, Random, 95% CI) | 0.82 (0.49 to 1.36)    | P = 0.66; I <sup>2</sup> =0%  |
| 10/14 levofloxacin VS. 10/14 sequential             | 1              | 230                 | Risk Ratio (M-H, Random, 95% CI) | 0.38 (0.10 to 1.38)    | Not applicable                |
| 14d hybrid VS. 10/14d sequential                    | 2              | 600                 | Risk Ratio (M-H, Random, 95% CI) | 0.48 (0.13 to 1.70)    | P = 0.20; I <sup>2</sup> =38% |
| 10/14d bismuth VS. 10/14d triple                    | 4              | 959                 | Risk Ratio (M-H, Random, 95% CI) | 1.06 (0.57 to 1.95)    | P = 0.54; I <sup>2</sup> =0%  |
| 10/14d concomitant VS. 10/14d triple                | 1              | 246                 | Risk Ratio (M-H, Random, 95% CI) | 1.36 (0.71 to 2.58)    | Not applicable                |
| 10/14d probiotic VS. 10/14d triple                  | 4              | 442                 | Risk Ratio (M-H, Random, 95% CI) | 0.43 (0.30 to 0.62)    | P = 0.39; I <sup>2</sup> =1%  |
| 10/14d ranitidine bismuth VS. 10/14d triple         | 2              | 160                 | Risk Ratio (M-H, Random, 95% CI) | 0.09 (0.01 to 0.66)    | P = 0.71; I <sup>2</sup> =0%  |
| 10/14d levofloxacin VS. 10/14d triple               | 2              | 304                 | Risk Ratio (M-H, Random, 95% CI) | 0.50 (0.21 to 1.17)    | P = 0.77; I <sup>2</sup> =0%  |
| 7d bismuth VS. 10/14d bismuth                       | 1              | 156                 | Risk Ratio (M-H, Random, 95% CI) | 1.33 (0.31 to 5.76)    | Not applicable                |
| 10/14d concomitant VS. 10/14d bismuth               | 1              | 158                 | Risk Ratio (M-H, Random, 95% CI) | 1.54 (0.45 to 5.24)    | Not applicable                |
| 7d levofloxacin VS. 7d bismuth                      | 1              | 145                 | Risk Ratio (M-H, Random, 95% CI) | 0.30 (0.01 to 6.10)    | Not applicable                |
| 10/14d probiotic VS. 7d probiotic                   | 1              | 47                  | Risk Ratio (M-H, Random, 95% CI) | 0.69 (0.03 to 15.95)   | Not applicable                |
| 10/14d ranitidine bismuth VS. 7d ranitidine bismuth | 1              | 110                 | Risk Ratio (M-H, Random, 95% CI) | 1.67 (0.42 to 6.64)    | Not applicable                |

CI = confidence interval; M-H=Mantel-Haenszel (test).

See Table 1 for key of intervention regimen names and descriptions.

Fig S5.2 Assessment of publication bias-Funnel plot for abdominal or epigastric pain adverse events

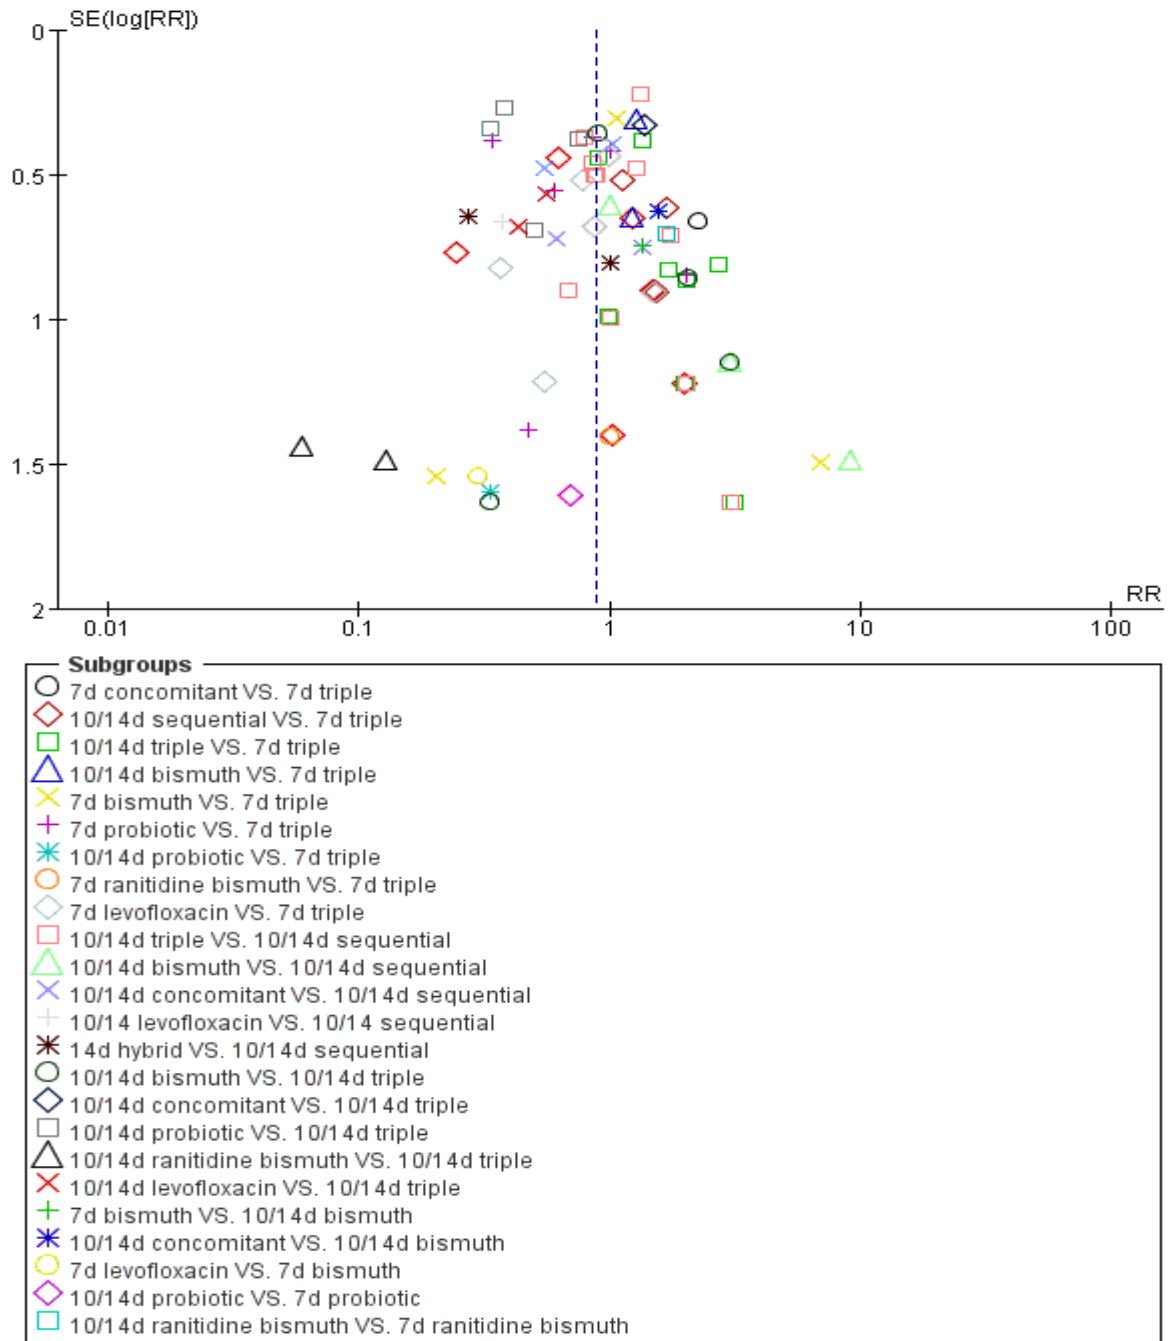

See Table 1 for key of intervention regimen names and descriptions.

## Part C) Adverse events: alteration in taste

Table S5.5 Direct and network-meta analysis results for alteration in taste

| Intervention              | Alteration in taste                           |                                          |
|---------------------------|-----------------------------------------------|------------------------------------------|
|                           | Network-meta analysis<br>risk ratio (95% CrI) | Direct comparison<br>risk ratio (95% CI) |
| <b>7d triple</b>          |                                               |                                          |
| 7d concomitant            | 3.72 (0.81 to 9.30)                           | 3.38 (0.73 to 15.53)                     |
| 10/14d sequential         | 1.13 (0.78 to 1.56)                           | 1.01 (0.65 to 1.58)                      |
| 10/14d triple             | 1.48 (1.06 to 1.99)                           | 1.69 (1.08 to 2.63)                      |
| 10/14d bismuth            | 0.56 (0.33 to 0.87)                           | 0.58 (0.15 to 2.19)                      |
| 7d bismuth                | 0.67 (0.40 to 1.05)                           | 0.71 (0.54 to 0.94)                      |
| 10/14d concomitant        | 1.21 (0.71 to 1.93)                           | NA                                       |
| 7d probiotic              | 0.91 (0.60 to 1.30)                           | 0.87 (0.53 to 1.41)                      |
| 10/14d probiotic          | 2.13 (1.09 to 3.61)                           | 2.00 (0.20 to 19.78)                     |
| 7d ranitidine bismuth     | 0.92 (0.50 to 1.54)                           | 0.91 (0.58 to 1.41)                      |
| 10/14d ranitidine bismuth | 1.16 (0.60 to 1.96)                           | NA                                       |
| 7d levofloxacin           | 0.47 (0.30 to 0.70)                           | 0.50 (0.31 to 0.81)                      |
| 10/14d levofloxacin       | 0.82 (0.34 to 1.60)                           | NA                                       |
| 14d hybrid                | 1.57 (0.70 to 2.83)                           | NA                                       |
| <b>7d concomitant</b>     |                                               |                                          |
| 10/14d sequential         | 0.45 (0.11 to 1.44)                           | NA                                       |
| 10/14d triple             | 0.59 (0.15 to 1.96)                           | NA                                       |
| 10/14d bismuth            | 0.22 (0.05 to 0.74)                           | NA                                       |
| 7d bismuth                | 0.27 (0.06 to 0.89)                           | NA                                       |
| 10/14d concomitant        | 0.49 (0.11 to 1.64)                           | NA                                       |
| 7d probiotic              | 0.36 (0.09 to 1.12)                           | NA                                       |
| 10/14d probiotic          | 0.86 (0.18 to 2.99)                           | NA                                       |
| 7d ranitidine bismuth     | 0.37 (0.08 to 1.28)                           | NA                                       |
| 10/14d ranitidine bismuth | 0.47 (0.10 to 1.59)                           | NA                                       |
| 7d levofloxacin           | 0.19 (0.05 to 0.59)                           | NA                                       |



| Intervention              | Alteration in taste                        |                                       |
|---------------------------|--------------------------------------------|---------------------------------------|
|                           | Network-meta analysis risk ratio (95% CrI) | Direct comparison risk ratio (95% CI) |
| 10/14d levofloxacin       | 0.33 (0.06 to 1.21)                        | NA                                    |
| 14d hybrid                | 0.62 (0.13 to 2.01)                        | NA                                    |
| <b>10/14d sequential</b>  |                                            |                                       |
| 10/14d triple             | 1.33 (0.97 to 1.79)                        | 1.18 (0.93 to 1.48)                   |
| 10/14d bismuth            | 0.50 (0.31 to 0.78)                        | 0.53 (0.25 to 1.13)                   |
| 7d bismuth                | 0.61 (0.33 to 1.06)                        | NA                                    |
| 10/14d concomitant        | 1.08 (0.73 to 1.54)                        | 1.06 (0.83 to 1.35)                   |
| 7d probiotic              | 0.83 (0.48 to 1.33)                        | NA                                    |
| 10/14d probiotic          | 1.93 (0.98 to 3.32)                        | NA                                    |
| 7d ranitidine bismuth     | 0.84 (0.42 to 1.51)                        | NA                                    |
| 10/14d ranitidine bismuth | 1.05 (0.54 to 1.78)                        | NA                                    |
| 7d levofloxacin           | 0.43 (0.24 to 0.71)                        | 0.34 (0.01 to 8.17)                   |
| 10/14d levofloxacin       | 0.73 (0.31 to 1.42)                        | 0.57 (0.17 to 1.90)                   |
| 14d hybrid                | 1.40 (0.69 to 2.38)                        | 1.07 (0.31 to 3.76)                   |
| <b>10/14d triple</b>      |                                            |                                       |
| 10/14d bismuth            | 0.38 (0.24 to 0.58)                        | 0.37 (0.22 to 0.62)                   |
| 7d bismuth                | 0.47 (0.25 to 0.80)                        | NA                                    |
| 10/14d concomitant        | 0.83 (0.50 to 1.28)                        | 1.00 (0.14 to 6.99)                   |
| 7d probiotic              | 0.63 (0.37 to 1.00)                        | NA                                    |
| 10/14d probiotic          | 1.45 (0.80 to 2.36)                        | 0.91 (0.76 to 1.07)                   |
| 7d ranitidine bismuth     | 0.64 (0.32 to 1.13)                        | NA                                    |
| 10/14d ranitidine bismuth | 0.79 (0.44 to 1.26)                        | 0.74 (0.13 to 4.17)                   |
| 7d levofloxacin           | 0.33 (0.19 to 0.54)                        | NA                                    |
| 10/14d levofloxacin       | 0.55 (0.25 to 1.02)                        | 0.56 (0.30 to 1.04)                   |
| 14d hybrid                | 1.07 (0.49 to 1.94)                        | NA                                    |
| <b>10/14d bismuth</b>     |                                            |                                       |

| Intervention              | Alteration in taste                           |                                          |
|---------------------------|-----------------------------------------------|------------------------------------------|
|                           | Network-meta analysis<br>risk ratio (95% CrI) | Direct comparison<br>risk ratio (95% CI) |
| 7d bismuth                | 1.27 (0.61 to 2.37)                           | NA                                       |
| 10/14d concomitant        | 2.26 (1.23 to 3.78)                           | 0.68 (0.20 to 2.33)                      |
| 7d probiotic              | 1.73 (0.88 to 3.01)                           | NA                                       |
| 10/14d probiotic          | 3.99 (1.86 to 7.31)                           | NA                                       |
| 7d ranitidine bismuth     | 1.75 (0.78 to 3.39)                           | NA                                       |
| 10/14d ranitidine bismuth | 2.17 (1.02 to 4.02)                           | NA                                       |
| 7d levofloxacin           | 0.90 (0.45 to 1.61)                           | NA                                       |
| 10/14d levofloxacin       | 1.52 (0.59 to 3.13)                           | NA                                       |
| 14d hybrid                | 2.93 (1.22 to 5.66)                           | NA                                       |
| <b>7d bismuth</b>         |                                               |                                          |
| 10/14d concomitant        | 1.92 (0.90 to 3.52)                           | NA                                       |
| 7d probiotic              | 1.44 (0.72 to 2.54)                           | NA                                       |
| 10/14d probiotic          | 3.38 (1.42 to 6.84)                           | NA                                       |
| 7d ranitidine bismuth     | 1.46 (0.65 to 2.84)                           | NA                                       |
| 10/14d ranitidine bismuth | 1.84 (0.78 to 3.66)                           | NA                                       |
| 7d levofloxacin           | 0.75 (0.37 to 1.36)                           | NA                                       |
| 10/14d levofloxacin       | 1.30 (0.45 to 2.87)                           | NA                                       |
| 14d hybrid                | 2.48 (0.93 to 5.05)                           | NA                                       |
| <b>10/14d concomitant</b> |                                               |                                          |
| 7d probiotic              | 0.80 (0.40 to 1.41)                           | NA                                       |
| 10/14d probiotic          | 1.85 (0.85 to 3.51)                           | NA                                       |
| 7d ranitidine bismuth     | 0.81 (0.36 to 1.56)                           | NA                                       |
| 10/14d ranitidine bismuth | 1.00 (0.47 to 1.87)                           | NA                                       |
| 7d levofloxacin           | 0.42 (0.21 to 0.75)                           | NA                                       |
| 10/14d levofloxacin       | 0.70 (0.27 to 1.45)                           | NA                                       |
| 14d hybrid                | 1.34 (0.59 to 2.51)                           | NA                                       |

| Intervention                     | Alteration in taste                           |                                          |
|----------------------------------|-----------------------------------------------|------------------------------------------|
|                                  | Network-meta analysis<br>risk ratio (95% CrI) | Direct comparison<br>risk ratio (95% CI) |
| <b>7d probiotic</b>              |                                               |                                          |
| 10/14d probiotic                 | 2.43 (1.13 to 4.56)                           | 4.27 (0.42 to 43.45)                     |
| 7d ranitidine bismuth            | 1.06 (0.50 to 1.96)                           | NA                                       |
| 10/14d ranitidine bismuth        | 1.33 (0.60 to 2.48)                           | NA                                       |
| 7d levofloxacin                  | 0.54 (0.30 to 0.93)                           | NA                                       |
| 10/14d levofloxacin              | 0.93 (0.35 to 1.95)                           | NA                                       |
| 14d hybrid                       | 1.79 (0.74 to 3.52)                           | NA                                       |
| <b>10/14d probiotic</b>          |                                               |                                          |
| 7d ranitidine bismuth            | 0.47 (0.20 to 0.97)                           | NA                                       |
| 10/14d ranitidine bismuth        | 0.59 (0.25 to 1.15)                           | NA                                       |
| 7d levofloxacin                  | 0.24 (0.11 to 0.48)                           | NA                                       |
| 10/14d levofloxacin              | 0.41 (0.15 to 0.88)                           | NA                                       |
| 14d hybrid                       | 0.80 (0.30 to 1.70)                           | NA                                       |
| <b>7d ranitidine bismuth</b>     |                                               |                                          |
| 10/14d ranitidine bismuth        | 1.34 (0.59 to 2.59)                           | 1.25 (0.35 to 4.41)                      |
| 7d levofloxacin                  | 0.56 (0.26 to 1.06)                           | NA                                       |
| 10/14d levofloxacin              | 0.95 (0.33 to 2.16)                           | NA                                       |
| 14d hybrid                       | 1.84 (0.67 to 3.94)                           | NA                                       |
| <b>10/14d ranitidine bismuth</b> |                                               |                                          |
| 7d levofloxacin                  | 0.45 (0.21 to 0.88)                           | NA                                       |
| 10/14d levofloxacin              | 0.75 (0.28 to 1.63)                           | NA                                       |
| 14d hybrid                       | 1.46 (0.56 to 3.10)                           | NA                                       |
| <b>7d levofloxacin</b>           |                                               |                                          |
| 10/14d levofloxacin              | 1.80 (0.66 to 3.86)                           | NA                                       |
| 14d hybrid                       | 3.45 (1.37 to 6.89)                           | NA                                       |
| <b>10/14d levofloxacin</b>       |                                               |                                          |

| <b>Intervention</b> | <b>Alteration in taste</b>                            |                                                  |
|---------------------|-------------------------------------------------------|--------------------------------------------------|
|                     | <b>Network-meta analysis<br/>risk ratio (95% CrI)</b> | <b>Direct comparison<br/>risk ratio (95% CI)</b> |
| 14d hybrid          | 2.21 (0.74 to 5.15)                                   | NA                                               |

CrI=credible interval; CI=confidence interval; NA=not applicable.  
See Table 1 for key of intervention regimen names and description.

Table S5.6 Traditional meta-analysis results

|                                                     | <b>Studies</b> | <b>Participants</b> | <b>Statistical Method</b>        | <b>Effect Estimate</b> | <b>Heterogeneity</b>          |
|-----------------------------------------------------|----------------|---------------------|----------------------------------|------------------------|-------------------------------|
| 7d concomitant VS. 7d triple                        | 1              | 110                 | Risk Ratio (M-H, Random, 95% CI) | 3.38 (0.73 to 15.53)   | Not applicable                |
| 10/14d sequential VS. 7d triple                     | 9              | 2564                | Risk Ratio (M-H, Random, 95% CI) | 1.01 (0.65 to 1.58)    | P = 0.98; I <sup>2</sup> =0%  |
| 10/14d triple VS. 7d triple                         | 6              | 1833                | Risk Ratio (M-H, Random, 95% CI) | 1.69 (1.08 to 2.63)    | P = 0.90; I <sup>2</sup> =0%  |
| 10/14d bismuth VS. 7d triple                        | 2              | 309                 | Risk Ratio (M-H, Random, 95% CI) | 0.58 (0.15 to 2.19)    | P=0.20; I <sup>2</sup> =38%   |
| 7d bismuth VS. 7d triple                            | 4              | 576                 | Risk Ratio (M-H, Random, 95% CI) | 0.71 (0.54 to 0.94)    | P=0.89; I <sup>2</sup> =0%    |
| 7d probiotic VS. 7d triple                          | 7              | 1701                | Risk Ratio (M-H, Random, 95% CI) | 0.87 (0.53 to 1.41)    | P = 0.02; I <sup>2</sup> =59% |
| 10/14d probiotic VS. 7d triple                      | 1              | 30                  | Risk Ratio (M-H, Random, 95% CI) | 2.00 (0.20 to 19.78)   | Not applicable                |
| 7d ranitidine bismuth VS. 7d triple                 | 4              | 562                 | Risk Ratio (M-H, Random, 95% CI) | 0.91 (0.58 to 1.41)    | P = 0.85; I <sup>2</sup> =0%  |
| 7d levofloxacin VS. 7d triple                       | 7              | 1845                | Risk Ratio (M-H, Random, 95% CI) | 0.50 (0.31 to 0.81)    | P = 0.16; I <sup>2</sup> =35% |
| 10/14d triple VS. 10/14d sequential                 | 5              | 1819                | Risk Ratio (M-H, Random, 95% CI) | 1.18 (0.93 to 1.48)    | P = 0.70; I <sup>2</sup> =0%  |
| 10/14d bismuth VS. 10/14d sequential                | 3              | 797                 | Risk Ratio (M-H, Random, 95% CI) | 0.53 (0.25 to 1.13)    | P = 0.71; I <sup>2</sup> =0%  |
| 10/14d concomitant VS. 10/14d sequential            | 4              | 903                 | Risk Ratio (M-H, Random, 95% CI) | 1.06 (0.83 to 1.35)    | P = 0.44; I <sup>2</sup> =0%  |
| 7d levofloxacin VS. 10/14d sequential               | 1              | 229                 | Risk Ratio (M-H, Random, 95% CI) | 0.34 (0.01 to 8.17)    | Not applicable                |
| 10/14d levofloxacin VS. 10/14d sequential           | 1              | 230                 | Risk Ratio (M-H, Random, 95% CI) | 0.57 (0.17 to 1.90)    | Not applicable                |
| 14d hybrid VS. 10/14d sequential                    | 2              | 600                 | Risk Ratio (M-H, Random, 95% CI) | 1.07 (0.31 to 3.76)    | P = 0.19; I <sup>2</sup> =41% |
| 10/14d bismuth VS. 10/14d triple                    | 3              | 745                 | Risk Ratio (M-H, Random, 95% CI) | 0.37 (0.22 to 0.62)    | P = 0.84; I <sup>2</sup> =0%  |
| 10/14d concomitant VS. 10/14d triple                | 1              | 246                 | Risk Ratio (M-H, Random, 95% CI) | 1.00 (0.14 to 6.99)    | Not applicable                |
| 10/14d probiotic VS. 10/14d triple                  | 3              | 282                 | Risk Ratio (M-H, Random, 95% CI) | 0.91 (0.76 to 1.07)    | P = 0.34; I <sup>2</sup> =6%  |
| 10/14d ranitidine bismuth VS. 10/14d triple         | 3              | 442                 | Risk Ratio (M-H, Random, 95% CI) | 0.74 (0.13 to 4.17)    | P = 0.05; I <sup>2</sup> =68% |
| 10/14d levofloxacin VS. 10/14d triple               | 2              | 480                 | Risk Ratio (M-H, Random, 95% CI) | 0.56 (0.30 to 1.04)    | P = 0.96; I <sup>2</sup> =0%  |
| 10/14d concomitant VS. 10/14d bismuth               | 1              | 158                 | Risk Ratio (M-H, Random, 95% CI) | 0.68 (0.20 to 2.33)    | Not applicable                |
| 10/14d probiotic VS. 7d probiotic                   | 1              | 47                  | Risk Ratio (M-H, Random, 95% CI) | 4.27 (0.42 to 43.45)   | Not applicable                |
| 10/14d ranitidine bismuth VS. 7d ranitidine bismuth | 1              | 110                 | Risk Ratio (M-H, Random, 95% CI) | 1.25 (0.35 to 4.41)    | Not applicable                |

CI=confidence interval; M-H=Mantel-Haenszel (test).

See Table 1 for key of intervention regimen names and descriptions.

Fig S5.3 Assessment of publication bias-Funnel plot of analysis for alteration in taste

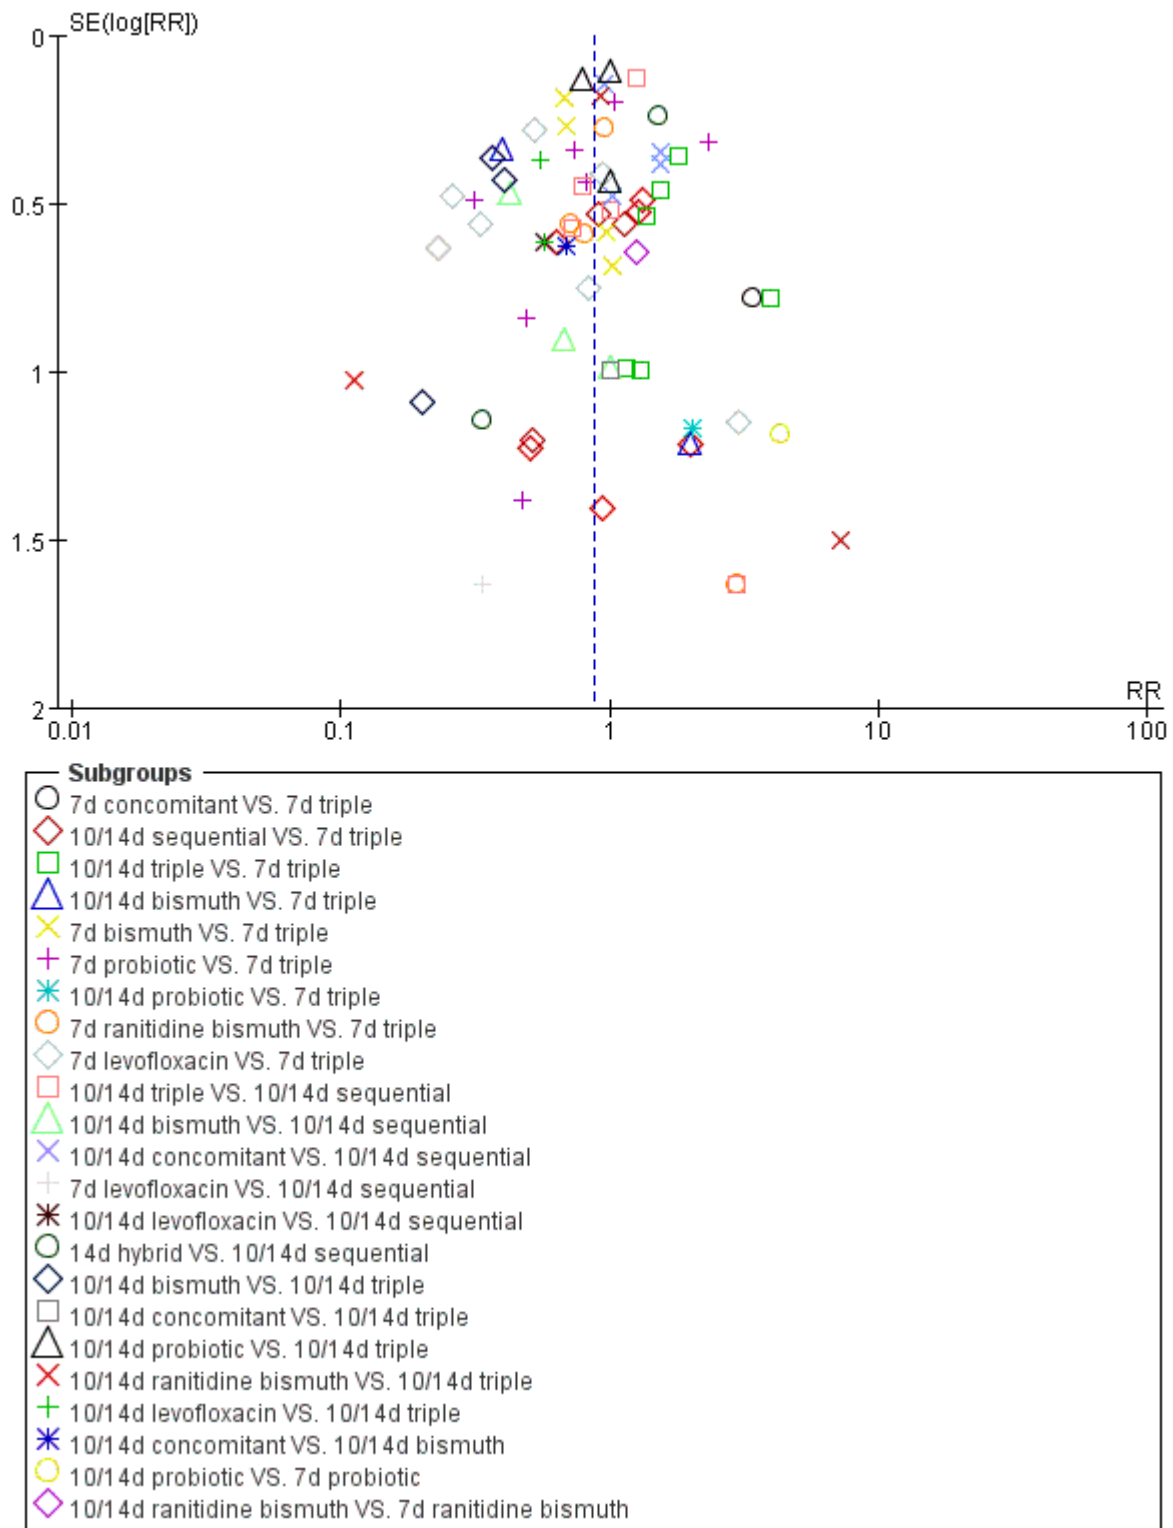

See Table 1 for key of intervention regimen names and descriptions.

## Part D) Adverse events: headache with or without vomiting

Table S5.7 Direct and network-meta analysis results for headache with or without vomiting

| Intervention              | Headache with or without vomiting             |                                          |
|---------------------------|-----------------------------------------------|------------------------------------------|
|                           | Network-meta analysis<br>risk ratio (95% CrI) | Direct comparison<br>risk ratio (95% CI) |
| <b>7d triple</b>          |                                               |                                          |
| 10/14d sequential         | 1.86 (0.97 to 3.33)                           | 1.37 (0.57 to 3.29)                      |
| 10/14d triple             | 1.51 (0.82 to 2.48)                           | 1.51 (0.87 to 2.61)                      |
| 10/14d bismuth            | 3.01 (1.46 to 5.87)                           | 2.64 (1.13 to 6.20)                      |
| 7d bismuth                | 1.98 (0.98 to 3.80)                           | 1.61 (1.11 to 2.34)                      |
| 10/14d concomitant        | 2.30 (0.68 to 5.63)                           | NA                                       |
| 7d probiotic              | 0.54 (0.04 to 2.07)                           | 0.43 (0.08 to 2.39)                      |
| 10/14d probiotic          | 0.28 (0.02 to 1.13)                           | NA                                       |
| 7d ranitidine bismuth     | 2.46 (0.12 to 12.20)                          | 3.00 (0.12 to 72.49)                     |
| 10/14d ranitidine bismuth | 0.91 (0.14 to 3.10)                           | NA                                       |
| 7d levofloxacin           | 1.07 (0.47 to 2.01)                           | 1.15 (0.63 to 2.10)                      |
| 10/14d levofloxacin       | 0.67 (0.12 to 2.03)                           | NA                                       |
| 14d hybrid                | 7.78 (0.28 to 33.33)                          | NA                                       |
| <b>10/14d sequential</b>  |                                               |                                          |
| 10/14d triple             | 0.85 (0.45 to 1.40)                           | 0.87 (0.50 to 1.54)                      |
| 10/14d bismuth            | 1.71 (0.79 to 3.33)                           | 2.33 (0.61 to 8.95)                      |
| 7d bismuth                | 1.16 (0.44 to 2.56)                           | NA                                       |
| 10/14d concomitant        | 1.27 (0.42 to 2.85)                           | 0.79 (0.27 to 2.30)                      |
| 7d probiotic              | 0.32 (0.02 to 1.29)                           | NA                                       |
| 10/14d probiotic          | 0.16 (0.01 to 0.65)                           | NA                                       |
| 7d ranitidine bismuth     | 1.41 (0.06 to 7.23)                           | NA                                       |
| 10/14d ranitidine bismuth | 0.51 (0.08 to 1.72)                           | NA                                       |
| 7d levofloxacin           | 0.64 (0.21 to 1.42)                           | NA                                       |
| 10/14d levofloxacin       | 0.37 (0.07 to 1.13)                           | NA                                       |

---

**Headache with or without vomiting**

| <b>Intervention</b>       | <b>Network-meta analysis<br/>risk ratio (95% CrI)</b> | <b>Direct comparison<br/>risk ratio (95% CI)</b> |
|---------------------------|-------------------------------------------------------|--------------------------------------------------|
| 14d hybrid                | 4.32 (0.17 to 18.81)                                  | 2.00 (0.18 to 21.67)                             |
| <b>10/14d triple</b>      |                                                       |                                                  |
| 10/14d bismuth            | 2.09 (1.01 to 4.15)                                   | 1.24 (0.58 to 2.65)                              |
| 7d bismuth                | 1.42 (0.57 to 3.16)                                   | NA                                               |
| 10/14d concomitant        | 1.58 (0.49 to 3.84)                                   | 1.00 (0.06 to 15.81)                             |
| 7d probiotic              | 0.39 (0.03 to 1.56)                                   | NA                                               |
| 10/14d probiotic          | 0.18 (0.01 to 0.76)                                   | 0.17 (0.04 to 0.76)                              |
| 7d ranitidine bismuth     | 1.70 (0.09 to 8.44)                                   | NA                                               |
| 10/14d ranitidine bismuth | 0.61 (0.10 to 1.99)                                   | 0.63 (0.01 to 71.90)                             |
| 7d levofloxacin           | 0.77 (0.28 to 1.68)                                   | NA                                               |
| 10/14d levofloxacin       | 0.44 (0.10 to 1.26)                                   | 0.41 (0.18 to 0.94)                              |
| 14d hybrid                | 5.41 (0.20 to 24.00)                                  | NA                                               |
| <b>10/14d bismuth</b>     |                                                       |                                                  |
| 7d bismuth                | 0.73 (0.27 to 1.56)                                   | 0.14 (0.02 to 1.13)                              |
| 10/14d concomitant        | 0.81 (0.24 to 1.88)                                   | 1.71 (0.42 to 6.91)                              |
| 7d probiotic              | 0.20 (0.01 to 0.83)                                   | NA                                               |
| 10/14d probiotic          | 0.10 (0.01 to 0.42)                                   | NA                                               |
| 7d ranitidine bismuth     | 0.90 (0.04 to 4.51)                                   | NA                                               |
| 10/14d ranitidine bismuth | 0.33 (0.05 to 1.12)                                   | NA                                               |
| 7d levofloxacin           | 0.40 (0.12 to 0.91)                                   | NA                                               |
| 10/14d levofloxacin       | 0.24 (0.04 to 0.73)                                   | NA                                               |
| 14d hybrid                | 2.85 (0.10 to 12.72)                                  | NA                                               |
| <b>7d bismuth</b>         |                                                       |                                                  |
| 10/14d concomitant        | 1.29 (0.31 to 3.51)                                   | NA                                               |
| 7d probiotic              | 0.30 (0.02 to 1.25)                                   | NA                                               |
| 10/14d probiotic          | 0.16 (0.01 to 0.66)                                   | NA                                               |

---



---

**Headache with or without vomiting**

| <b>Intervention</b>       | <b>Network-meta analysis<br/>risk ratio (95% CrI)</b> | <b>Direct comparison<br/>risk ratio (95% CI)</b> |
|---------------------------|-------------------------------------------------------|--------------------------------------------------|
| 7d ranitidine bismuth     | 1.38 (0.06 to 6.99)                                   | NA                                               |
| 10/14d ranitidine bismuth | 0.51 (0.07 to 1.82)                                   | NA                                               |
| 7d levofloxacin           | 0.60 (0.20 to 1.32)                                   | 0.17 (0.01 to 3.02)                              |
| 10/14d levofloxacin       | 0.37 (0.06 to 1.22)                                   | NA                                               |
| 14d hybrid                | 4.38 (0.14 to 19.83)                                  | NA                                               |
| <b>10/14d concomitant</b> |                                                       |                                                  |
| 7d probiotic              | 0.31 (0.02 to 1.41)                                   | NA                                               |
| 10/14d probiotic          | 0.16 (0.01 to 0.76)                                   | NA                                               |
| 7d ranitidine bismuth     | 1.38 (0.05 to 7.18)                                   | NA                                               |
| 10/14d ranitidine bismuth | 0.51 (0.06 to 2.00)                                   | NA                                               |
| 7d levofloxacin           | 0.62 (0.14 to 1.79)                                   | NA                                               |
| 10/14d levofloxacin       | 0.37 (0.05 to 1.30)                                   | NA                                               |
| 14d hybrid                | 4.26 (0.12 to 21.04)                                  | NA                                               |
| <b>7d probiotic</b>       |                                                       |                                                  |
| 10/14d probiotic          | 1.45 (0.03 to 8.18)                                   | NA                                               |
| 7d ranitidine bismuth     | 12.73 (0.19 to 78.01)                                 | NA                                               |
| 10/14d ranitidine bismuth | 4.75 (0.18 to 25.50)                                  | NA                                               |
| 7d levofloxacin           | 5.52 (0.42 to 25.94)                                  | NA                                               |
| 10/14d levofloxacin       | 3.51 (0.15 to 17.72)                                  | NA                                               |
| 14d hybrid                | 41.28 (0.44 to 263.60)                                | NA                                               |
| <b>10/14d probiotic</b>   |                                                       |                                                  |
| 7d ranitidine bismuth     | 28.85 (0.39 to 175.50)                                | NA                                               |
| 10/14d ranitidine bismuth | 10.10 (0.40 to 53.60)                                 | NA                                               |
| 7d levofloxacin           | 12.43 (0.79 to 62.83)                                 | NA                                               |
| 10/14d levofloxacin       | 7.43 (0.29 to 38.19)                                  | NA                                               |
| 14d hybrid                | 88.12 (0.99 to 529.10)                                | NA                                               |

---

---

**Headache with or without vomiting**

| <b>Intervention</b>              | <b>Network-meta analysis<br/>risk ratio (95% CrI)</b> | <b>Direct comparison<br/>risk ratio (95% CI)</b> |
|----------------------------------|-------------------------------------------------------|--------------------------------------------------|
| <b>7d ranitidine bismuth</b>     |                                                       |                                                  |
| 10/14d ranitidine bismuth        | 0.91 (0.06 to 4.00)                                   | 1.00 (0.15 to 6.85)                              |
| 7d levofloxacin                  | 1.74 (0.07 to 9.04)                                   | NA                                               |
| 10/14d levofloxacin              | 1.03 (0.03 to 5.67)                                   | NA                                               |
| 14d hybrid                       | 12.17 (0.10 to 81.86)                                 | NA                                               |
| <b>10/14d ranitidine bismuth</b> |                                                       |                                                  |
| 7d levofloxacin                  | 2.20 (0.26 to 8.31)                                   | NA                                               |
| 10/14d levofloxacin              | 1.26 (0.11 to 5.33)                                   | NA                                               |
| 14d hybrid                       | 15.56 (0.29 to 91.39)                                 | NA                                               |
| <b>7d levofloxacin</b>           |                                                       |                                                  |
| 10/14d levofloxacin              | 0.72 (0.11 to 2.45)                                   | NA                                               |
| 14d hybrid                       | 8.37 (0.26 to 39.16)                                  | NA                                               |
| <b>10/14d levofloxacin</b>       |                                                       |                                                  |
| 14d hybrid                       | 18.94 (0.41 to 96.63)                                 | NA                                               |

---

CrI=credible interval; CI=confidence interval; NA=not applicable.  
See Table 1 for key of intervention regimen names and descriptions.

Table S5.8 Traditional meta-analysis results

|                                                     | <b>Studies</b> | <b>Participants</b> | <b>Statistical Method</b>        | <b>Effect Estimate</b> | <b>Heterogeneity</b>          |
|-----------------------------------------------------|----------------|---------------------|----------------------------------|------------------------|-------------------------------|
| 10/14d sequential VS. 7d triple                     | 6              | 2133                | Risk Ratio (M-H, Random, 95% CI) | 1.37 (0.57 to 3.29)    | P = 0.80; I <sup>2</sup> =0%  |
| 10/14d triple VS. 7d triple                         | 5              | 1699                | Risk Ratio (M-H, Random, 95% CI) | 1.51 (0.87 to 2.61)    | P = 0.84; I <sup>2</sup> =0%  |
| 10/14d bismuth VS. 7d triple                        | 1              | 438                 | Risk Ratio (M-H, Random, 95% CI) | 2.64 (1.13 to 6.20)    | Not applicable                |
| 7d bismuth VS. 7d triple                            | 3              | 563                 | Risk Ratio (M-H, Random, 95% CI) | 1.61 (1.11 to 2.34)    | P=0.66; I <sup>2</sup> =0%    |
| 7d probiotic VS. 7d triple                          | 2              | 507                 | Risk Ratio (M-H, Random, 95% CI) | 0.43 (0.08 to 2.39)    | P=0.42; I <sup>2</sup> =0%    |
| 7d ranitidine bismuth VS. 7d triple                 | 1              | 150                 | Risk Ratio (M-H, Random, 95% CI) | 3.00 (0.12 to 72.49)   | Not applicable                |
| 7d levofloxacin VS. 7d triple                       | 5              | 1398                | Risk Ratio (M-H, Random, 95% CI) | 1.15 (0.63 to 2.10)    | P = 0.69; I <sup>2</sup> =0%  |
| 10/14d triple VS. 10/14 sequential                  | 5              | 1846                | Risk Ratio (M-H, Random, 95% CI) | 0.87 (0.50 to 1.54)    | P = 0.36; I <sup>2</sup> =7%  |
| 10/14d bismuth VS. 10/14d sequential                | 2              | 653                 | Risk Ratio (M-H, Random, 95% CI) | 2.33 (0.61 to 8.95)    | P = 0.88; I <sup>2</sup> =0%  |
| 10/14d concomitant VS. 10/14d sequential            | 2              | 401                 | Risk Ratio (M-H, Random, 95% CI) | 0.79 (0.27 to 2.30)    | P = 0.39; I <sup>2</sup> =0%  |
| 14d hybrid VS. 10/14d sequential                    | 1              | 180                 | Risk Ratio (M-H, Random, 95% CI) | 2.00 (0.18 to 21.67)   | Not applicable                |
| 10/14 bismuth VS. 10/14d triple                     | 2              | 539                 | Risk Ratio (M-H, Random, 95% CI) | 1.24 (0.58 to 2.65)    | P = 0.35; I <sup>2</sup> =0%  |
| 10/14d concomitant VS. 10/14d triple                | 1              | 246                 | Risk Ratio (M-H, Random, 95% CI) | 1.00 (0.06 to 15.81)   | Not applicable                |
| 10/14d probiotic VS. 10/14d triple                  | 1              | 82                  | Risk Ratio (M-H, Random, 95% CI) | 0.17 (0.04 to 0.76)    | Not applicable                |
| 10/14d ranitidine bismuth VS. 10/14d triple         | 2              | 163                 | Risk Ratio (M-H, Random, 95% CI) | 0.63 (0.01 to 71.90)   | P = 0.02; I <sup>2</sup> =82% |
| 10/14d levofloxacin VS. 10/14d triple               | 1              | 250                 | Risk Ratio (M-H, Random, 95% CI) | 0.41 (0.18 to 0.94)    | Not applicable                |
| 7d bismuth VS. 10/14d bismuth                       | 1              | 156                 | Risk Ratio (M-H, Random, 95% CI) | 0.14 (0.02 to 1.13)    | Not applicable                |
| 10/14d concomitant VS. 10/14d bismuth               | 1              | 158                 | Risk Ratio (M-H, Random, 95% CI) | 1.71 (0.42 to 6.91)    | Not applicable                |
| 7d levofloxacin VS. 7d bismuth                      | 1              | 145                 | Risk Ratio (M-H, Random, 95% CI) | 0.17 (0.01 to 3.02)    | Not applicable                |
| 10/14d ranitidine bismuth VS. 7d ranitidine bismuth | 1              | 110                 | Risk Ratio (M-H, Random, 95% CI) | 1.00 (0.15 to 6.85)    | Not applicable                |

CI = confidence interval; M-H=Mantel-Haenszel (test).

See Table 1 for key of intervention regimen names and descriptions.

Fig S5.4 Assessment of publication bias-Funnel plot of analysis for headache with or without vomiting.

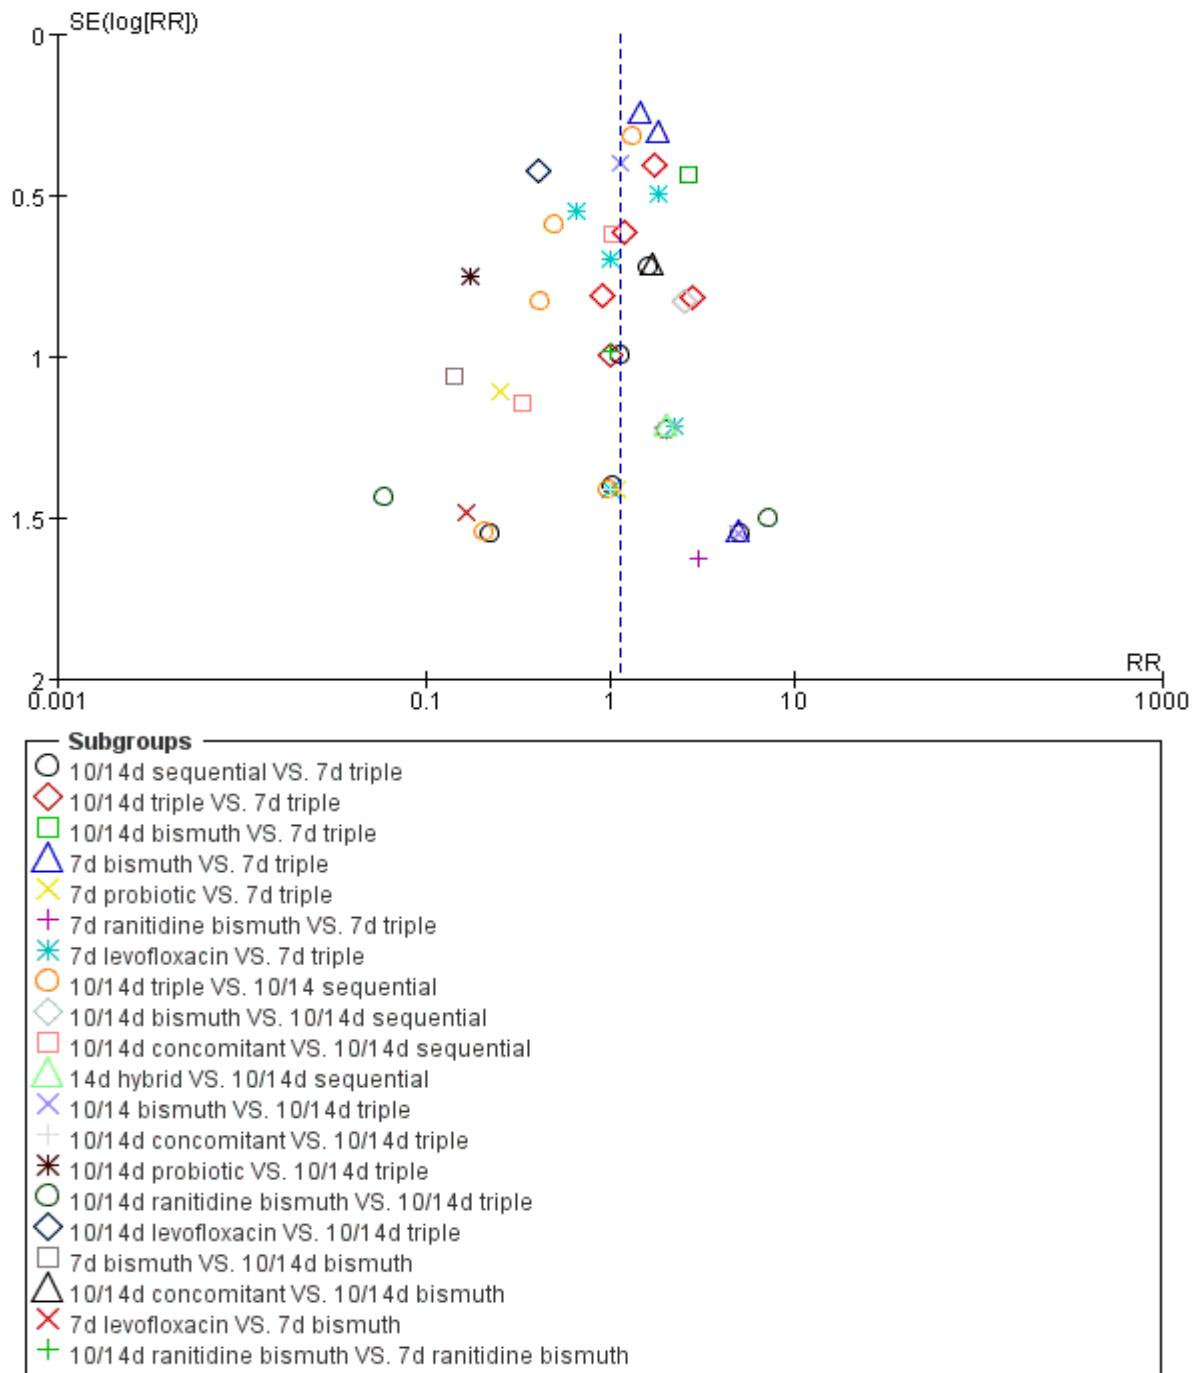

See Table 1 for key of intervention regimen names and descriptions.

Table S5.9 Direct and network-meta analysis results for diarrhoea

| Intervention              | Diarrhoea                                     |                                          |
|---------------------------|-----------------------------------------------|------------------------------------------|
|                           | Network-meta analysis<br>risk ratio (95% CrI) | Direct comparison<br>risk ratio (95% CI) |
| <b>7d triple</b>          |                                               |                                          |
| 7d concomitant            | 1.46 (0.52 to 3.14)                           | 1.26 (0.68 to 2.34)                      |
| 10/14d sequential         | 0.79 (0.59 to 1.03)                           | 0.75 (0.55 to 1.02)                      |
| 10/14d triple             | 1.03 (0.78 to 1.32)                           | 0.95 (0.70 to 1.27)                      |
| 10/14d bismuth            | 0.89 (0.57 to 1.36)                           | 0.89 (0.16 to 4.85)                      |
| 7d bismuth                | 1.35 (0.82 to 2.03)                           | 1.44 (0.91 to 2.29)                      |
| 10/14d concomitant        | 1.06 (0.60 to 1.67)                           | NA                                       |
| 7d probiotic              | 0.60 (0.40 to 0.87)                           | 0.65 (0.36 to 1.18)                      |
| 10/14d probiotic          | 0.36 (0.18 to 0.63)                           | 1.50 (0.29 to 7.73)                      |
| 7d ranitidine bismuth     | 1.12 (0.55 to 1.94)                           | 1.20 (0.77 to 1.86)                      |
| 10/14d ranitidine bismuth | 0.83 (0.42 to 1.44)                           | NA                                       |
| 7d levofloxacin           | 0.61 (0.38 to 0.89)                           | 0.69 (0.51 to 0.94)                      |
| 10/14d levofloxacin       | 1.30 (0.68 to 2.19)                           | NA                                       |
| 14d hybrid                | 0.91 (0.25 to 2.25)                           | NA                                       |
| <b>7d concomitant</b>     |                                               |                                          |
| 10/14d sequential         | 0.67 (0.24 to 1.57)                           | NA                                       |
| 10/14d triple             | 0.87 (0.31 to 2.01)                           | NA                                       |
| 10/14d bismuth            | 0.75 (0.25 to 1.88)                           | NA                                       |
| 7d bismuth                | 1.14 (0.37 to 2.78)                           | NA                                       |
| 10/14d concomitant        | 0.89 (0.28 to 2.21)                           | NA                                       |
| 7d probiotic              | 0.51 (0.17 to 1.23)                           | NA                                       |
| 10/14d probiotic          | 0.30 (0.09 to 0.79)                           | NA                                       |
| 7d ranitidine bismuth     | 0.95 (0.27 to 2.46)                           | NA                                       |
| 10/14d ranitidine bismuth | 0.70 (0.20 to 1.79)                           | NA                                       |
| 7d levofloxacin           | 0.51 (0.17 to 1.25)                           | NA                                       |

| Intervention              | Diarrhoea                                     |                                          |
|---------------------------|-----------------------------------------------|------------------------------------------|
|                           | Network-meta analysis<br>risk ratio (95% CrI) | Direct comparison<br>risk ratio (95% CI) |
| 10/14d levofloxacin       | 1.09 (0.33 to 2.76)                           | NA                                       |
| 14d hybrid                | 0.77 (0.14 to 2.38)                           | NA                                       |
| <b>10/14d sequential</b>  |                                               |                                          |
| 10/14d triple             | 1.31 (1.00 to 1.70)                           | 1.22 (0.98 to 1.51)                      |
| 10/14d bismuth            | 1.14 (0.69 to 1.79)                           | 1.20 (0.17 to 8.53)                      |
| 7d bismuth                | 1.75 (0.99 to 2.79)                           | NA                                       |
| 10/14d concomitant        | 1.35 (0.81 to 2.03)                           | 1.45 (0.94 to 2.22)                      |
| 7d probiotic              | 0.78 (0.46 to 1.21)                           | NA                                       |
| 10/14d probiotic          | 0.46 (0.23 to 0.82)                           | NA                                       |
| 7d ranitidine bismuth     | 1.45 (0.67 to 2.63)                           | NA                                       |
| 10/14d ranitidine bismuth | 1.06 (0.54 to 1.85)                           | NA                                       |
| 7d levofloxacin           | 0.79 (0.45 to 1.25)                           | 3.03 (0.12 to 73.51)                     |
| 10/14d levofloxacin       | 1.66 (0.88 to 2.80)                           | 2.00 (0.78 to 5.15)                      |
| 14d hybrid                | 1.15 (0.34 to 2.77)                           | 1.00 (0.39 to 2.60)                      |
| <b>10/14d triple</b>      |                                               |                                          |
| 10/14d bismuth            | 0.87 (0.55 to 1.33)                           | 0.82 (0.32 to 2.08)                      |
| 7d bismuth                | 1.34 (0.77 to 2.12)                           | NA                                       |
| 10/14d concomitant        | 1.04 (0.60 to 1.62)                           | 0.86 (0.30 to 2.48)                      |
| 7d probiotic              | 0.60 (0.36 to 0.92)                           | NA                                       |
| 10/14d probiotic          | 0.35 (0.19 to 0.59)                           | 0.46 (0.34 to 0.64)                      |
| 7d ranitidine bismuth     | 1.11 (0.52 to 2.00)                           | NA                                       |
| 10/14d ranitidine bismuth | 0.81 (0.44 to 1.34)                           | 0.72 (0.41 to 1.25)                      |
| 7d levofloxacin           | 0.61 (0.35 to 0.94)                           | NA                                       |
| 10/14d levofloxacin       | 1.27 (0.70 to 2.07)                           | 1.16 (0.74 to 1.82)                      |
| 14d hybrid                | 0.89 (0.25 to 2.20)                           | NA                                       |
| <b>10/14d bismuth</b>     |                                               |                                          |

| Intervention              | Diarrhoea                                     |                                          |
|---------------------------|-----------------------------------------------|------------------------------------------|
|                           | Network-meta analysis<br>risk ratio (95% CrI) | Direct comparison<br>risk ratio (95% CI) |
| 7d bismuth                | 1.59 (0.82 to 2.64)                           | 0.72 (0.28 to 1.87)                      |
| 10/14d concomitant        | 1.24 (0.62 to 2.15)                           | 0.75 (0.17 to 3.27)                      |
| 7d probiotic              | 0.71 (0.37 to 1.20)                           | NA                                       |
| 10/14d probiotic          | 0.42 (0.19 to 0.80)                           | NA                                       |
| 7d ranitidine bismuth     | 1.33 (0.55 to 2.57)                           | NA                                       |
| 10/14d ranitidine bismuth | 0.97 (0.44 to 1.83)                           | NA                                       |
| 7d levofloxacin           | 0.72 (0.36 to 1.24)                           | NA                                       |
| 10/14d levofloxacin       | 1.52 (0.70 to 2.78)                           | NA                                       |
| 14d hybrid                | 1.07 (0.27 to 2.87)                           | NA                                       |
| <b>7d bismuth</b>         |                                               |                                          |
| 10/14d concomitant        | 0.82 (0.40 to 1.51)                           | NA                                       |
| 7d probiotic              | 0.47 (0.25 to 0.83)                           | NA                                       |
| 10/14d probiotic          | 0.28 (0.12 to 0.56)                           | NA                                       |
| 7d ranitidine bismuth     | 0.87 (0.37 to 1.73)                           | NA                                       |
| 10/14d ranitidine bismuth | 0.64 (0.29 to 1.28)                           | NA                                       |
| 7d levofloxacin           | 0.47 (0.25 to 0.83)                           | 0.30 (0.01 to 6.10)                      |
| 10/14d levofloxacin       | 1.01 (0.45 to 1.95)                           | NA                                       |
| 14d hybrid                | 0.71 (0.18 to 1.86)                           | NA                                       |
| <b>10/14d concomitant</b> |                                               |                                          |
| 7d probiotic              | 0.61 (0.31 to 1.11)                           | NA                                       |
| 10/14d probiotic          | 0.36 (0.16 to 0.72)                           | NA                                       |
| 7d ranitidine bismuth     | 1.13 (0.46 to 2.31)                           | NA                                       |
| 10/14d ranitidine bismuth | 0.83 (0.37 to 1.65)                           | NA                                       |
| 7d levofloxacin           | 0.62 (0.30 to 1.12)                           | NA                                       |
| 10/14d levofloxacin       | 1.30 (0.60 to 2.52)                           | NA                                       |
| 14d hybrid                | 0.90 (0.24 to 2.35)                           | NA                                       |

| Intervention                     | Diarrhoea                                     |                                          |
|----------------------------------|-----------------------------------------------|------------------------------------------|
|                                  | Network-meta analysis<br>risk ratio (95% CrI) | Direct comparison<br>risk ratio (95% CI) |
| <b>7d probiotic</b>              |                                               |                                          |
| 10/14d probiotic                 | 0.62 (0.28 to 1.20)                           | 3.20 (0.60 to 17.18)                     |
| 7d ranitidine bismuth            | 1.94 (0.84 to 3.73)                           | NA                                       |
| 10/14d ranitidine bismuth        | 1.43 (0.65 to 2.74)                           | NA                                       |
| 7d levofloxacin                  | 1.05 (0.56 to 1.78)                           | NA                                       |
| 10/14d levofloxacin              | 2.24 (1.03 to 4.19)                           | NA                                       |
| 14d hybrid                       | 1.57 (0.41 to 4.13)                           | NA                                       |
| <b>10/14d probiotic</b>          |                                               |                                          |
| 7d ranitidine bismuth            | 3.47 (1.27 to 7.46)                           | NA                                       |
| 10/14d ranitidine bismuth        | 2.51 (1.05 to 5.14)                           | NA                                       |
| 7d levofloxacin                  | 1.89 (0.82 to 3.73)                           | NA                                       |
| 10/14d levofloxacin              | 3.95 (1.64 to 7.93)                           | NA                                       |
| 14d hybrid                       | 2.79 (0.66 to 7.74)                           | NA                                       |
| <b>7d ranitidine bismuth</b>     |                                               |                                          |
| 10/14d ranitidine bismuth        | 0.81 (0.33 to 1.72)                           | 1.50 (0.26 to 8.63)                      |
| 7d levofloxacin                  | 0.60 (0.26 to 1.20)                           | NA                                       |
| 10/14d levofloxacin              | 1.28 (0.50 to 2.74)                           | NA                                       |
| 14d hybrid                       | 0.89 (0.21 to 2.48)                           | NA                                       |
| <b>10/14d ranitidine bismuth</b> |                                               |                                          |
| 7d levofloxacin                  | 0.81 (0.35 to 1.58)                           | NA                                       |
| 10/14d levofloxacin              | 1.70 (0.72 to 3.39)                           | NA                                       |
| 14d hybrid                       | 1.20 (0.29 to 3.24)                           | NA                                       |
| <b>7d levofloxacin</b>           |                                               |                                          |
| 10/14d levofloxacin              | 2.23 (1.02 to 4.26)                           | NA                                       |
| 14d hybrid                       | 1.56 (0.40 to 4.14)                           | NA                                       |
| <b>10/14d levofloxacin</b>       |                                               |                                          |



| <b>Intervention</b> | <b>Diarrhoea</b>                                      |                                                  |
|---------------------|-------------------------------------------------------|--------------------------------------------------|
|                     | <b>Network-meta analysis<br/>risk ratio (95% CrI)</b> | <b>Direct comparison<br/>risk ratio (95% CI)</b> |
| 14d hybrid          | 0.76 (0.19 to 2.04)                                   | NA                                               |

CrI=credible interval; CI=confidence interval; NA=not applicable.  
See Table 1 for key of intervention regimen names and descriptions.

Table S5.10 Traditional meta-analysis results

|                                                     | <b>Studies</b> | <b>Participants</b> | <b>Statistical Method</b>        | <b>Effect Estimate</b> | <b>Heterogeneity</b>          |
|-----------------------------------------------------|----------------|---------------------|----------------------------------|------------------------|-------------------------------|
| 7d concomitant VS. 7d triple                        | 1              | 110                 | Risk Ratio (M-H, Random, 95% CI) | 1.26 (0.68 to 2.34)    | Not applicable                |
| 10/14d sequential VS. 7d triple                     | 13             | 3223                | Risk Ratio (M-H, Random, 95% CI) | 0.75 (0.55 to 1.02)    | P = 0.95; I <sup>2</sup> =0%  |
| 10/14d triple VS. 7d triple                         | 11             | 3083                | Risk Ratio (M-H, Random, 95% CI) | 0.95 (0.70 to 1.27)    | P = 0.99; I <sup>2</sup> =0%  |
| 10/14d bismuth VS. 7d triple                        | 3              | 747                 | Risk Ratio (M-H, Random, 95% CI) | 0.89 (0.16 to 4.85)    | P = 0.14; I <sup>2</sup> =48% |
| 7d bismuth VS. 7d triple                            | 4              | 576                 | Risk Ratio (M-H, Random, 95% CI) | 1.44 (0.91 to 2.29)    | P = 0.22; I <sup>2</sup> =33% |
| 7d probiotic VS. 7d triple                          | 9              | 2050                | Risk Ratio (M-H, Random, 95% CI) | 0.65 (0.36 to 1.18)    | P = 0.01; I <sup>2</sup> =59% |
| 10/14d probiotic VS. 7d triple                      | 1              | 30                  | Risk Ratio (M-H, Random, 95% CI) | 1.50 (0.29 to 7.73)    | Not applicable                |
| 7d ranitidine bismuth VS. 7d triple                 | 3              | 522                 | Risk Ratio (M-H, Random, 95% CI) | 1.20 (0.77 to 1.86)    | P = 0.53; I <sup>2</sup> =0%  |
| 7d levofloxacin VS. 7d triple                       | 7              | 1845                | Risk Ratio (M-H, Random, 95% CI) | 0.69 (0.51 to 0.94)    | P = 0.38; I <sup>2</sup> =6%  |
| 10/14d triple VS. 10 /14d sequential                | 10             | 2841                | Risk Ratio (M-H, Random, 95% CI) | 1.22 (0.98 to 1.51)    | P = 0.71; I <sup>2</sup> =0%  |
| 10/14d bismuth VS. 10/14d sequential                | 4              | 1011                | Risk Ratio (M-H, Random, 95% CI) | 1.20 (0.17 to 8.53)    | P = 0.22; I <sup>2</sup> =34% |
| 10/14d concomitant VS. 10/14d sequential            | 4              | 903                 | Risk Ratio (M-H, Random, 95% CI) | 1.45 (0.94 to 2.22)    | P = 0.35; I <sup>2</sup> =10% |
| 7d levofloxacin VS. 10/14d sequential               | 1              | 229                 | Risk Ratio (M-H, Random, 95% CI) | 3.03 (0.12 to 73.51)   | Not applicable                |
| 10/14d levofloxacin VS. 10/14d sequential           | 1              | 230                 | Risk Ratio (M-H, Random, 95% CI) | 2.00 (0.78 to 5.15)    | Not applicable                |
| 14d hybrid VS. 10/14d sequential                    | 2              | 600                 | Risk Ratio (M-H, Random, 95% CI) | 1.00 (0.39 to 2.60)    | P = 1.00; I <sup>2</sup> =0%  |
| 10/14d bismuth VS. 10/14d triple                    | 4              | 959                 | Risk Ratio (M-H, Random, 95% CI) | 0.82 (0.32 to 2.08)    | P = 0.13; I <sup>2</sup> =47% |
| 10/14d concomitant VS. 10/14d triple                | 1              | 246                 | Risk Ratio (M-H, Random, 95% CI) | 0.86 (0.30 to 2.48)    | Not applicable                |
| 10/14d probiotic VS. 10/14d triple                  | 4              | 442                 | Risk Ratio (M-H, Random, 95% CI) | 0.46 (0.34 to 0.64)    | P = 0.95; I <sup>2</sup> =0%  |
| 10/14d ranitidine bismuth VS. 10/14d triple         | 4              | 549                 | Risk Ratio (M-H, Random, 95% CI) | 0.72 (0.41 to 1.25)    | P = 0.27; I <sup>2</sup> =24% |
| 10/14d levofloxacin VS. 10/14d triple               | 3              | 554                 | Risk Ratio (M-H, Random, 95% CI) | 1.16 (0.74 to 1.82)    | P = 0.51; I <sup>2</sup> =0%  |
| 7d bismuth VS. 10/14d bismuth                       | 2              | 316                 | Risk Ratio (M-H, Random, 95% CI) | 0.72 (0.28 to 1.87)    | P = 0.45; I <sup>2</sup> =0%  |
| 10/14d concomitant VS. 10/14d bismuth               | 1              | 200                 | Risk Ratio (M-H, Random, 95% CI) | 0.75 (0.17 to 3.27)    | Not applicable                |
| 7d levofloxacin VS. 7d bismuth                      | 1              | 145                 | Risk Ratio (M-H, Random, 95% CI) | 0.30 (0.01 to 6.10)    | Not applicable                |
| 10/14d probiotic VS. 7d probiotic                   | 1              | 47                  | Risk Ratio (M-H, Random, 95% CI) | 3.20 (0.60 to 17.18)   | Not applicable                |
| 10/14d ranitidine bismuth VS. 7d ranitidine bismuth | 1              | 110                 | Risk Ratio (M-H, Random, 95% CI) | 1.50 (0.26 to 8.63)    | Not applicable                |

CI=confidence interval; M-H=Mantel-Haenszel (test).

See Table 1 for key of intervention regimen names and descriptions.

Fig S5.5 Assessment of publication bias-Funnel plot of analysis of patients experiencing diarrhoea

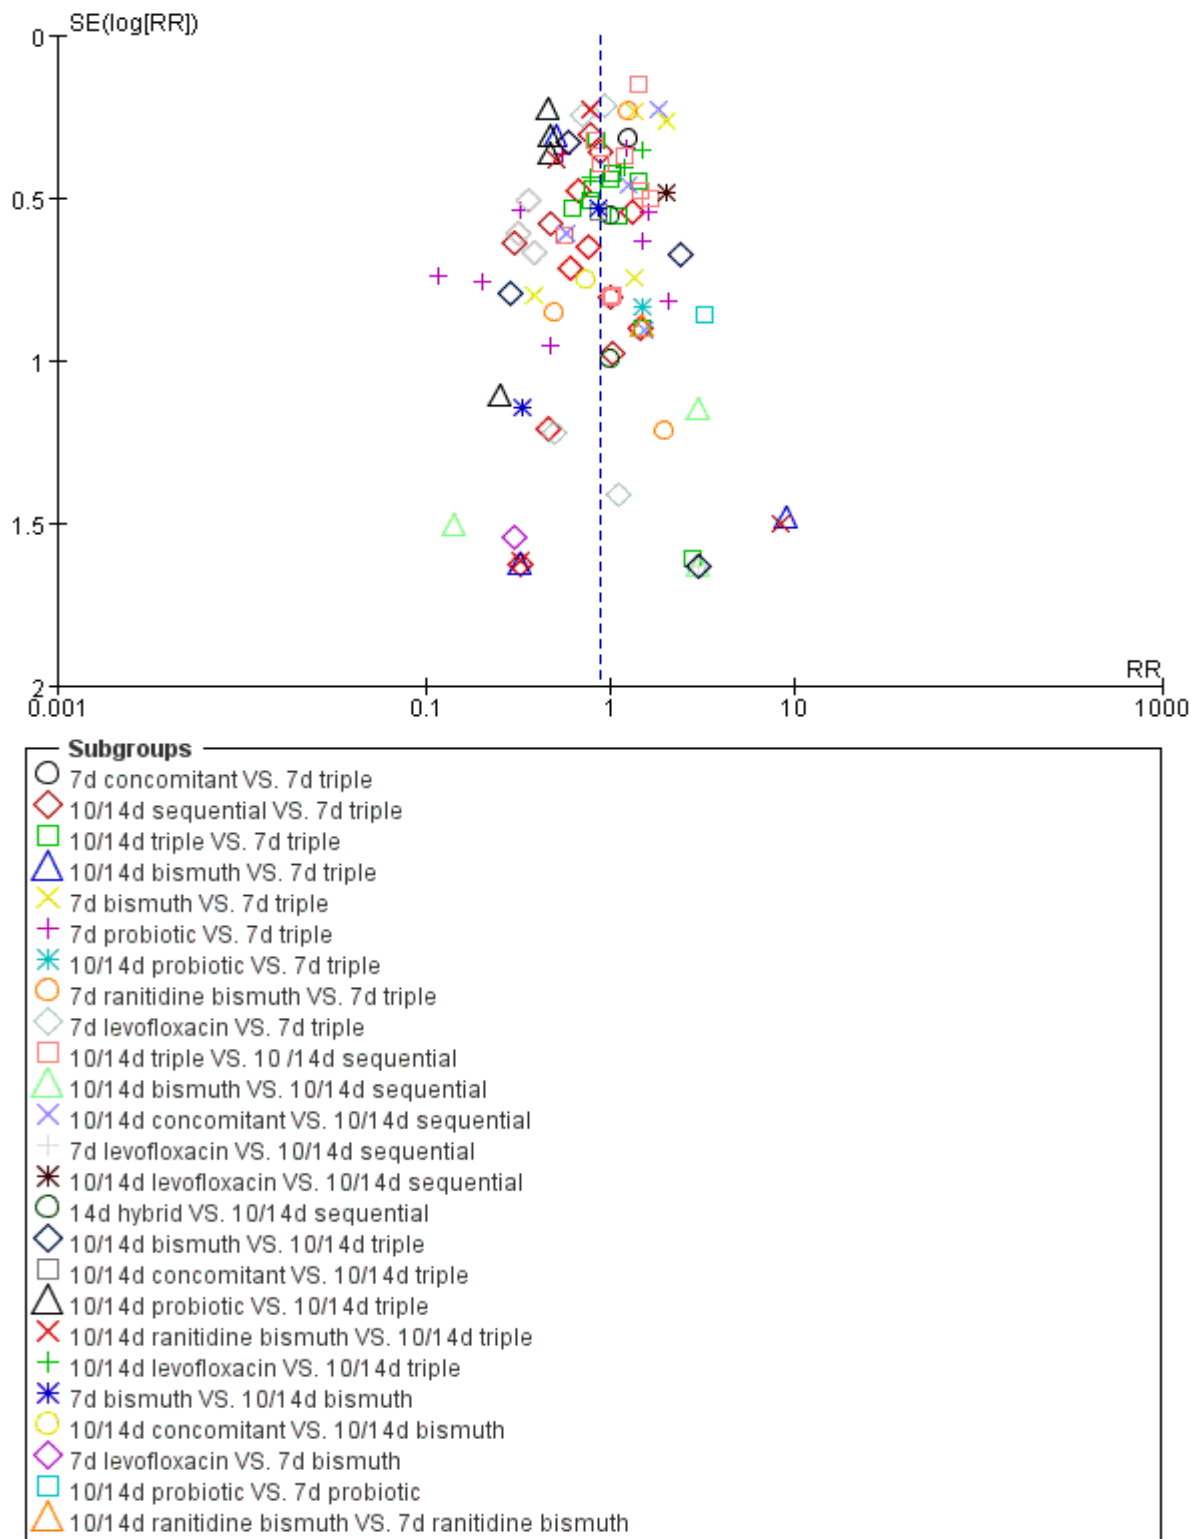

See Table 1 for key of intervention regimen names and descriptions.
